# Supplementary material for: Limited Effects of an eIF2α S51A Allele on Neurological Impairments in the 5xFAD Mouse Model of Alzheimer's Disease
Source: Neural Plast. 2015 Mar 26;2015:825157. doi: 10.1155/2015/825157 (PMC4391319; doi:10.1155/2015/825157)
Supplement: Supplementary file 5 [file 825157.f5.xlsx]

## Sheet: eIF2alpha IPA results.txt
¬© 2000-2014 Ingenuity Systems	Inc. All rights reserved.
AnalysisName:eIF2alpha 5xFAD vs WT Reference set: Mouse Exon 1.0 ST Array
Relationship to include: Direct and Indirect
Includes Endogenous Chemicals
Optional Analyses: My Pathways My List
Filter Summary:
Consider only relationships where
confidence = Experimentally Observed
Cutoff:
bio Functions:
Category	Diseases or Functions Annotation	p-Value	Predicted Activation State	Activation z-score	Notes	Molecules	# Molecules
Cell-To-Cell Signaling and Interaction	activation of cells	1.72e-21		1.755	bias	B2M	BCL2A1	C1QA	C3AR1	CD180	CD84	CD9	CHI3L1	CLEC5A	CLEC7A	CSF1R	CTSS	FCER1G	FCGR2A	FCGR2B	GFAP	Gp49a/Lilrb4	GRN	HLA-B	IGF1	INPP5D	IRF8	ITGAM	ITGAX	ITGB2	LAG3	LAPTM5	LCP2	LYN	PIK3CG	PLEK	RUNX1	SAMSN1	SELPLG	SLC11A1	STAT3	TF	TLR7	TREM2	TYROBP	40
Inflammatory Response	inflammatory response	4.22e-21	Increased	3.295	bias	BCL2A1	C3AR1	CCL3L1/CCL3L3	Cd33	CD9	CHI3L1	CLEC5A	CLEC7A	CMKLR1	CSF1R	CSF3R	FCER1G	FCGR2A	FCGR2B	Gp49a/Lilrb4	GRN	HPGDS	IGF1	INPP5D	ITGAM	ITGB2	LCP1	LYN	MYO1F	NCKAP1L	PIK3CG	S1PR3	SELPLG	SERPINA3	SLC11A1	SPI1	STAT3	TBXAS1	TLR7	TYROBP	35
Hematological System Development and Function	quantity of blood cells	4.3e-21	Increased	2.243	bias	B2M	BCL2A1	C1QA	C3AR1	CCL3L1/CCL3L3	CD180	Cd33	CD84	CD9	CHI3L1	CLEC7A	CMKLR1	CSF1R	CSF3R	CTSD	CTSS	FCER1G	FCGR2A	FCGR2B	Gp49a/Lilrb4	HEXB	HLA-B	IGF1	INPP5D	IRF8	ITGAM	ITGB2	LAG3	LCP2	LYN	PIK3CG	PLEK	RASGRP3	RUNX1	S1PR3	SAMSN1	SELPLG	SLC14A1	SPI1	STAT3	TF	TYROBP	42
Tissue Morphology	quantity of blood cells	4.3e-21	Increased	2.243	bias	B2M	BCL2A1	C1QA	C3AR1	CCL3L1/CCL3L3	CD180	Cd33	CD84	CD9	CHI3L1	CLEC7A	CMKLR1	CSF1R	CSF3R	CTSD	CTSS	FCER1G	FCGR2A	FCGR2B	Gp49a/Lilrb4	HEXB	HLA-B	IGF1	INPP5D	IRF8	ITGAM	ITGB2	LAG3	LCP2	LYN	PIK3CG	PLEK	RASGRP3	RUNX1	S1PR3	SAMSN1	SELPLG	SLC14A1	SPI1	STAT3	TF	TYROBP	42
Cellular Function and Maintenance	function of leukocytes	8.5e-21				B2M	BCL2A1	C3AR1	CD84	CD9	CHI3L1	CLEC7A	CMKLR1	CSF1R	CTSS	CTSZ	FCER1G	FCGR2A	FCGR2B	Gp49a/Lilrb4	GPR84	GRN	HLA-B	INPP5D	IRF8	ITGAM	ITGB2	LAG3	LCP1	LYN	PIK3CG	S1PR3	SAMSN1	STAT3	TLR7	TREM2	TYROBP	32
Cellular Movement	leukocyte migration	1.37e-20	Increased	3.72	bias	C3AR1	CCL3L1/CCL3L3	CD9	CHI3L1	CLEC5A	CLEC7A	CMKLR1	CSF1R	CSF3R	CTSS	CTSZ	FCER1G	FCGR2A	FCGR2B	GFAP	GRN	IGF1	INPP5D	ITGAM	ITGAX	ITGB2	LAG3	LCP1	LCP2	LYN	MYO1F	NCKAP1L	PIK3CG	RUNX1	S1PR3	SELPLG	SERPINA3	SPI1	STAT3	TLR7	TREM2	TYROBP	Wfdc17	38
Immune Cell Trafficking	leukocyte migration	1.37e-20	Increased	3.72	bias	C3AR1	CCL3L1/CCL3L3	CD9	CHI3L1	CLEC5A	CLEC7A	CMKLR1	CSF1R	CSF3R	CTSS	CTSZ	FCER1G	FCGR2A	FCGR2B	GFAP	GRN	IGF1	INPP5D	ITGAM	ITGAX	ITGB2	LAG3	LCP1	LCP2	LYN	MYO1F	NCKAP1L	PIK3CG	RUNX1	S1PR3	SELPLG	SERPINA3	SPI1	STAT3	TLR7	TREM2	TYROBP	Wfdc17	38
Cell-To-Cell Signaling and Interaction	activation of blood cells	6.29e-20		1.667	bias	B2M	C1QA	C3AR1	CD180	CD84	CHI3L1	CLEC5A	CLEC7A	CSF1R	CTSS	FCER1G	FCGR2A	FCGR2B	GRN	HLA-B	IGF1	INPP5D	IRF8	ITGAM	ITGB2	LAG3	LAPTM5	LCP2	LYN	PIK3CG	PLEK	RUNX1	SAMSN1	SELPLG	SLC11A1	STAT3	TLR7	TREM2	TYROBP	34
Hematological System Development and Function	activation of blood cells	6.29e-20		1.667	bias	B2M	C1QA	C3AR1	CD180	CD84	CHI3L1	CLEC5A	CLEC7A	CSF1R	CTSS	FCER1G	FCGR2A	FCGR2B	GRN	HLA-B	IGF1	INPP5D	IRF8	ITGAM	ITGB2	LAG3	LAPTM5	LCP2	LYN	PIK3CG	PLEK	RUNX1	SAMSN1	SELPLG	SLC11A1	STAT3	TLR7	TREM2	TYROBP	34
Cell-To-Cell Signaling and Interaction	activation of leukocytes	9.84e-20		1.497	bias	B2M	C1QA	C3AR1	CD180	CD84	CHI3L1	CLEC5A	CLEC7A	CSF1R	CTSS	FCER1G	FCGR2A	FCGR2B	GRN	HLA-B	IGF1	INPP5D	IRF8	ITGAM	ITGB2	LAG3	LAPTM5	LCP2	LYN	PIK3CG	RUNX1	SAMSN1	SLC11A1	STAT3	TLR7	TREM2	TYROBP	32
Inflammatory Response	activation of leukocytes	9.84e-20		1.497	bias	B2M	C1QA	C3AR1	CD180	CD84	CHI3L1	CLEC5A	CLEC7A	CSF1R	CTSS	FCER1G	FCGR2A	FCGR2B	GRN	HLA-B	IGF1	INPP5D	IRF8	ITGAM	ITGB2	LAG3	LAPTM5	LCP2	LYN	PIK3CG	RUNX1	SAMSN1	SLC11A1	STAT3	TLR7	TREM2	TYROBP	32
Hematological System Development and Function	activation of leukocytes	9.84e-20		1.497	bias	B2M	C1QA	C3AR1	CD180	CD84	CHI3L1	CLEC5A	CLEC7A	CSF1R	CTSS	FCER1G	FCGR2A	FCGR2B	GRN	HLA-B	IGF1	INPP5D	IRF8	ITGAM	ITGB2	LAG3	LAPTM5	LCP2	LYN	PIK3CG	RUNX1	SAMSN1	SLC11A1	STAT3	TLR7	TREM2	TYROBP	32
Immune Cell Trafficking	activation of leukocytes	9.84e-20		1.497	bias	B2M	C1QA	C3AR1	CD180	CD84	CHI3L1	CLEC5A	CLEC7A	CSF1R	CTSS	FCER1G	FCGR2A	FCGR2B	GRN	HLA-B	IGF1	INPP5D	IRF8	ITGAM	ITGB2	LAG3	LAPTM5	LCP2	LYN	PIK3CG	RUNX1	SAMSN1	SLC11A1	STAT3	TLR7	TREM2	TYROBP	32
Hematological System Development and Function	proliferation of immune cells	1.14e-19		-0.193	bias	B2M	BCL2A1	C10orf54	CD180	CD37	CD84	CSF1R	CSF3R	CTSD	CTSZ	FCER1G	FCGR2B	Gp49a/Lilrb4	HPGDS	IGF1	INPP5D	IRF8	ITGAM	ITGAX	ITGB2	LAG3	LAPTM5	LCP2	LY86	LYN	MAFB	NCKAP1L	PIK3CG	RASGRP3	RUNX1	SAMSN1	SPI1	STAT3	TLR7	TYROBP	35
Cellular Development	proliferation of immune cells	1.14e-19		-0.193	bias	B2M	BCL2A1	C10orf54	CD180	CD37	CD84	CSF1R	CSF3R	CTSD	CTSZ	FCER1G	FCGR2B	Gp49a/Lilrb4	HPGDS	IGF1	INPP5D	IRF8	ITGAM	ITGAX	ITGB2	LAG3	LAPTM5	LCP2	LY86	LYN	MAFB	NCKAP1L	PIK3CG	RASGRP3	RUNX1	SAMSN1	SPI1	STAT3	TLR7	TYROBP	35
Cellular Growth and Proliferation	proliferation of immune cells	1.14e-19		-0.193	bias	B2M	BCL2A1	C10orf54	CD180	CD37	CD84	CSF1R	CSF3R	CTSD	CTSZ	FCER1G	FCGR2B	Gp49a/Lilrb4	HPGDS	IGF1	INPP5D	IRF8	ITGAM	ITGAX	ITGB2	LAG3	LAPTM5	LCP2	LY86	LYN	MAFB	NCKAP1L	PIK3CG	RASGRP3	RUNX1	SAMSN1	SPI1	STAT3	TLR7	TYROBP	35
Cellular Development	proliferation of blood cells	1.26e-19		-0.246	bias	B2M	BCL2A1	C10orf54	CCL3L1/CCL3L3	CD180	CD37	CD84	CSF1R	CSF3R	CTSD	CTSZ	FCER1G	FCGR2B	Gp49a/Lilrb4	HPGDS	IGF1	INPP5D	IRF8	ITGAM	ITGAX	ITGB2	LAG3	LAPTM5	LCP2	LY86	LYN	MAFB	NCKAP1L	PIK3CG	RASGRP3	RUNX1	SAMSN1	SPI1	STAT3	TLR7	TYROBP	36
Cellular Growth and Proliferation	proliferation of blood cells	1.26e-19		-0.246	bias	B2M	BCL2A1	C10orf54	CCL3L1/CCL3L3	CD180	CD37	CD84	CSF1R	CSF3R	CTSD	CTSZ	FCER1G	FCGR2B	Gp49a/Lilrb4	HPGDS	IGF1	INPP5D	IRF8	ITGAM	ITGAX	ITGB2	LAG3	LAPTM5	LCP2	LY86	LYN	MAFB	NCKAP1L	PIK3CG	RASGRP3	RUNX1	SAMSN1	SPI1	STAT3	TLR7	TYROBP	36
Hematological System Development and Function	quantity of leukocytes	2.29e-19	Increased	2.21	bias	B2M	BCL2A1	C1QA	C3AR1	CCL3L1/CCL3L3	CD180	CD84	CHI3L1	CLEC7A	CMKLR1	CSF1R	CSF3R	CTSD	CTSS	FCER1G	FCGR2A	FCGR2B	Gp49a/Lilrb4	HEXB	HLA-B	IGF1	INPP5D	IRF8	ITGAM	ITGB2	LAG3	LCP2	LYN	PIK3CG	RASGRP3	RUNX1	S1PR3	SAMSN1	SELPLG	SPI1	STAT3	TF	TYROBP	38
Tissue Morphology	quantity of leukocytes	2.29e-19	Increased	2.21	bias	B2M	BCL2A1	C1QA	C3AR1	CCL3L1/CCL3L3	CD180	CD84	CHI3L1	CLEC7A	CMKLR1	CSF1R	CSF3R	CTSD	CTSS	FCER1G	FCGR2A	FCGR2B	Gp49a/Lilrb4	HEXB	HLA-B	IGF1	INPP5D	IRF8	ITGAM	ITGB2	LAG3	LCP2	LYN	PIK3CG	RASGRP3	RUNX1	S1PR3	SAMSN1	SELPLG	SPI1	STAT3	TF	TYROBP	38
Hematological System Development and Function	quantity of mononuclear leukocytes	9.19e-19	Increased	2.363	bias	B2M	BCL2A1	C3AR1	CD180	CD84	CHI3L1	CMKLR1	CSF1R	CSF3R	CTSD	CTSS	FCER1G	FCGR2A	FCGR2B	Gp49a/Lilrb4	HEXB	HLA-B	IGF1	INPP5D	IRF8	ITGAM	ITGB2	LAG3	LCP2	LYN	PIK3CG	RASGRP3	RUNX1	S1PR3	SAMSN1	SELPLG	SPI1	STAT3	TYROBP	34
Tissue Morphology	quantity of mononuclear leukocytes	9.19e-19	Increased	2.363	bias	B2M	BCL2A1	C3AR1	CD180	CD84	CHI3L1	CMKLR1	CSF1R	CSF3R	CTSD	CTSS	FCER1G	FCGR2A	FCGR2B	Gp49a/Lilrb4	HEXB	HLA-B	IGF1	INPP5D	IRF8	ITGAM	ITGB2	LAG3	LCP2	LYN	PIK3CG	RASGRP3	RUNX1	S1PR3	SAMSN1	SELPLG	SPI1	STAT3	TYROBP	34
Hematological System Development and Function	proliferation of mononuclear leukocytes	1.01e-18		0.259	bias	B2M	BCL2A1	C10orf54	CD180	CD37	CD84	CSF1R	CTSD	CTSZ	FCER1G	FCGR2B	Gp49a/Lilrb4	HPGDS	IGF1	INPP5D	IRF8	ITGAM	ITGAX	ITGB2	LAG3	LAPTM5	LCP2	LY86	LYN	NCKAP1L	PIK3CG	RASGRP3	RUNX1	SAMSN1	SPI1	STAT3	TLR7	TYROBP	33
Cellular Development	proliferation of mononuclear leukocytes	1.01e-18		0.259	bias	B2M	BCL2A1	C10orf54	CD180	CD37	CD84	CSF1R	CTSD	CTSZ	FCER1G	FCGR2B	Gp49a/Lilrb4	HPGDS	IGF1	INPP5D	IRF8	ITGAM	ITGAX	ITGB2	LAG3	LAPTM5	LCP2	LY86	LYN	NCKAP1L	PIK3CG	RASGRP3	RUNX1	SAMSN1	SPI1	STAT3	TLR7	TYROBP	33
Cellular Growth and Proliferation	proliferation of mononuclear leukocytes	1.01e-18		0.259	bias	B2M	BCL2A1	C10orf54	CD180	CD37	CD84	CSF1R	CTSD	CTSZ	FCER1G	FCGR2B	Gp49a/Lilrb4	HPGDS	IGF1	INPP5D	IRF8	ITGAM	ITGAX	ITGB2	LAG3	LAPTM5	LCP2	LY86	LYN	NCKAP1L	PIK3CG	RASGRP3	RUNX1	SAMSN1	SPI1	STAT3	TLR7	TYROBP	33
Hematological System Development and Function	quantity of lymphocytes	2.47e-18	Increased	2.395	bias	B2M	BCL2A1	C3AR1	CD180	CD84	CHI3L1	CMKLR1	CSF1R	CTSD	CTSS	FCER1G	FCGR2A	FCGR2B	Gp49a/Lilrb4	HEXB	HLA-B	IGF1	INPP5D	IRF8	ITGAM	ITGB2	LAG3	LCP2	LYN	PIK3CG	RASGRP3	RUNX1	S1PR3	SAMSN1	SELPLG	SPI1	STAT3	TYROBP	33
Tissue Morphology	quantity of lymphocytes	2.47e-18	Increased	2.395	bias	B2M	BCL2A1	C3AR1	CD180	CD84	CHI3L1	CMKLR1	CSF1R	CTSD	CTSS	FCER1G	FCGR2A	FCGR2B	Gp49a/Lilrb4	HEXB	HLA-B	IGF1	INPP5D	IRF8	ITGAM	ITGB2	LAG3	LCP2	LYN	PIK3CG	RASGRP3	RUNX1	S1PR3	SAMSN1	SELPLG	SPI1	STAT3	TYROBP	33
Hematological System Development and Function	proliferation of lymphocytes	6.05e-18		-0.019		B2M	BCL2A1	C10orf54	CD180	CD37	CD84	CTSD	CTSZ	FCER1G	FCGR2B	Gp49a/Lilrb4	HPGDS	IGF1	INPP5D	IRF8	ITGAM	ITGAX	ITGB2	LAG3	LAPTM5	LCP2	LY86	LYN	NCKAP1L	PIK3CG	RASGRP3	RUNX1	SAMSN1	SPI1	STAT3	TLR7	TYROBP	32
Cellular Development	proliferation of lymphocytes	6.05e-18		-0.019		B2M	BCL2A1	C10orf54	CD180	CD37	CD84	CTSD	CTSZ	FCER1G	FCGR2B	Gp49a/Lilrb4	HPGDS	IGF1	INPP5D	IRF8	ITGAM	ITGAX	ITGB2	LAG3	LAPTM5	LCP2	LY86	LYN	NCKAP1L	PIK3CG	RASGRP3	RUNX1	SAMSN1	SPI1	STAT3	TLR7	TYROBP	32
Cellular Growth and Proliferation	proliferation of lymphocytes	6.05e-18		-0.019		B2M	BCL2A1	C10orf54	CD180	CD37	CD84	CTSD	CTSZ	FCER1G	FCGR2B	Gp49a/Lilrb4	HPGDS	IGF1	INPP5D	IRF8	ITGAM	ITGAX	ITGB2	LAG3	LAPTM5	LCP2	LY86	LYN	NCKAP1L	PIK3CG	RASGRP3	RUNX1	SAMSN1	SPI1	STAT3	TLR7	TYROBP	32
Hematological System Development and Function	cell movement of leukocytes	9.17e-18	Increased	3.51	bias	C3AR1	CCL3L1/CCL3L3	CD9	CLEC5A	CMKLR1	CSF1R	CSF3R	CTSS	CTSZ	FCER1G	FCGR2A	FCGR2B	GFAP	GRN	INPP5D	ITGAM	ITGAX	ITGB2	LAG3	LCP1	LCP2	LYN	MYO1F	NCKAP1L	PIK3CG	RUNX1	S1PR3	SELPLG	SERPINA3	SPI1	STAT3	TREM2	TYROBP	33
Cellular Movement	cell movement of leukocytes	9.17e-18	Increased	3.51	bias	C3AR1	CCL3L1/CCL3L3	CD9	CLEC5A	CMKLR1	CSF1R	CSF3R	CTSS	CTSZ	FCER1G	FCGR2A	FCGR2B	GFAP	GRN	INPP5D	ITGAM	ITGAX	ITGB2	LAG3	LCP1	LCP2	LYN	MYO1F	NCKAP1L	PIK3CG	RUNX1	S1PR3	SELPLG	SERPINA3	SPI1	STAT3	TREM2	TYROBP	33
Immune Cell Trafficking	cell movement of leukocytes	9.17e-18	Increased	3.51	bias	C3AR1	CCL3L1/CCL3L3	CD9	CLEC5A	CMKLR1	CSF1R	CSF3R	CTSS	CTSZ	FCER1G	FCGR2A	FCGR2B	GFAP	GRN	INPP5D	ITGAM	ITGAX	ITGB2	LAG3	LCP1	LCP2	LYN	MYO1F	NCKAP1L	PIK3CG	RUNX1	S1PR3	SELPLG	SERPINA3	SPI1	STAT3	TREM2	TYROBP	33
Cellular Movement	cell movement	1.54e-17	Increased	4.55	bias	ABI3	ARPC1B	C3AR1	CCL3L1/CCL3L3	CD9	CHI3L1	CLDN11	CLEC5A	CLEC7A	CMKLR1	CSF1R	CSF3R	CTSS	CTSZ	FCER1G	FCGR2A	FCGR2B	GFAP	GRN	IGF1	IGFBP5	INPP5D	IRF8	ITGAM	ITGAX	ITGB2	ITGB5	KLK6	LAG3	LCP1	LCP2	LYN	MAFB	MSN	MYO1F	NAIP	NCKAP1L	OSMR	PIK3CG	RUNX1	S1PR3	SELPLG	SERPINA3	SLC11A1
Inflammatory Response	quantity of phagocytes	5.46e-17		0.281		B2M	BCL2A1	C1QA	C3AR1	CCL3L1/CCL3L3	CLEC7A	CMKLR1	CSF1R	CSF3R	CTSS	FCGR2A	FCGR2B	Gp49a/Lilrb4	INPP5D	IRF8	ITGAM	ITGB2	LYN	PIK3CG	RUNX1	SELPLG	SPI1	STAT3	TF	TYROBP	25
Hematological System Development and Function	quantity of phagocytes	5.46e-17		0.281		B2M	BCL2A1	C1QA	C3AR1	CCL3L1/CCL3L3	CLEC7A	CMKLR1	CSF1R	CSF3R	CTSS	FCGR2A	FCGR2B	Gp49a/Lilrb4	INPP5D	IRF8	ITGAM	ITGB2	LYN	PIK3CG	RUNX1	SELPLG	SPI1	STAT3	TF	TYROBP	25
Tissue Morphology	quantity of phagocytes	5.46e-17		0.281		B2M	BCL2A1	C1QA	C3AR1	CCL3L1/CCL3L3	CLEC7A	CMKLR1	CSF1R	CSF3R	CTSS	FCGR2A	FCGR2B	Gp49a/Lilrb4	INPP5D	IRF8	ITGAM	ITGB2	LYN	PIK3CG	RUNX1	SELPLG	SPI1	STAT3	TF	TYROBP	25
Humoral Immune Response	production of antibody	1.66e-16		-0.087		B2M	C1QA	C3AR1	CD180	CD37	CD84	CHI3L1	CTSS	FCER1G	FCGR2B	Ggta1	Gp49a/Lilrb4	HEXB	IRF8	ITGB2	LY86	LYN	RASGRP3	SAMSN1	SPI1	TLR7	TYROBP	22
Protein Synthesis	production of antibody	1.66e-16		-0.087		B2M	C1QA	C3AR1	CD180	CD37	CD84	CHI3L1	CTSS	FCER1G	FCGR2B	Ggta1	Gp49a/Lilrb4	HEXB	IRF8	ITGB2	LY86	LYN	RASGRP3	SAMSN1	SPI1	TLR7	TYROBP	22
Cellular Function and Maintenance	function of phagocytes	2e-16				BCL2A1	CD9	CHI3L1	CLEC7A	CMKLR1	CSF1R	CTSZ	FCER1G	FCGR2A	FCGR2B	Gp49a/Lilrb4	GRN	ITGAM	ITGB2	LCP1	LYN	PIK3CG	SAMSN1	STAT3	TLR7	TREM2	TYROBP	22
Hematological System Development and Function	homing of leukocytes	2.21e-16	Increased	3.047	bias	C3AR1	CCL3L1/CCL3L3	CD9	CMKLR1	CSF1R	CSF3R	FCER1G	FCGR2A	GRN	INPP5D	ITGAM	ITGB2	LCP1	LYN	MYO1F	NCKAP1L	PIK3CG	RUNX1	S1PR3	SELPLG	SERPINA3	SPI1	STAT3	23
Cellular Movement	homing of leukocytes	2.21e-16	Increased	3.047	bias	C3AR1	CCL3L1/CCL3L3	CD9	CMKLR1	CSF1R	CSF3R	FCER1G	FCGR2A	GRN	INPP5D	ITGAM	ITGB2	LCP1	LYN	MYO1F	NCKAP1L	PIK3CG	RUNX1	S1PR3	SELPLG	SERPINA3	SPI1	STAT3	23
Immune Cell Trafficking	homing of leukocytes	2.21e-16	Increased	3.047	bias	C3AR1	CCL3L1/CCL3L3	CD9	CMKLR1	CSF1R	CSF3R	FCER1G	FCGR2A	GRN	INPP5D	ITGAM	ITGB2	LCP1	LYN	MYO1F	NCKAP1L	PIK3CG	RUNX1	S1PR3	SELPLG	SERPINA3	SPI1	STAT3	23
Immunological Disease	systemic autoimmune syndrome	2.45e-16		0.666		B2M	C1QA	C3AR1	CCL3L1/CCL3L3	CD180	CD68	CD84	CHI3L1	CSF3R	CTSS	FCER1G	FCGR2A	FCGR2B	GFAP	Gp49a/Lilrb4	GPNMB	GRN	HLA-B	IGF1	IGFBP5	INPP5D	ITGAM	ITGAX	ITGB2	LCP1	LY86	LYN	MYO1F	NAIP	Oasl2	PIK3CG	PLD4	PLEK	STAT3	TLR7	TYROBP	36
Cellular Function and Maintenance	function of antigen presenting cells	2.64e-16				CD9	CHI3L1	CLEC7A	CMKLR1	CSF1R	CTSS	CTSZ	FCER1G	FCGR2A	FCGR2B	GRN	ITGAM	LCP1	LYN	PIK3CG	SAMSN1	STAT3	TLR7	TREM2	TYROBP	20
Cell-To-Cell Signaling and Interaction	response of phagocytes	6.35e-16	Increased	2.522	bias	CLEC5A	CLEC7A	FCER1G	FCGR2A	FCGR2B	INPP5D	IRF8	ITGAM	ITGAX	ITGB2	LYN	PIK3CG	SELPLG	SPI1	STAT3	TLR7	TREM2	TYROBP	18
Inflammatory Response	response of phagocytes	6.35e-16	Increased	2.522	bias	CLEC5A	CLEC7A	FCER1G	FCGR2A	FCGR2B	INPP5D	IRF8	ITGAM	ITGAX	ITGB2	LYN	PIK3CG	SELPLG	SPI1	STAT3	TLR7	TREM2	TYROBP	18
Humoral Immune Response	quantity of immunoglobulin	7.15e-16		-0.17		B2M	C1QA	C3AR1	CD180	CD37	CD84	CHI3L1	CTSS	FCER1G	FCGR2B	Ggta1	Gp49a/Lilrb4	HEXB	IRF8	ITGB2	LY86	LYN	RASGRP3	SAMSN1	SPI1	TYROBP	21
Protein Synthesis	quantity of immunoglobulin	7.15e-16		-0.17		B2M	C1QA	C3AR1	CD180	CD37	CD84	CHI3L1	CTSS	FCER1G	FCGR2B	Ggta1	Gp49a/Lilrb4	HEXB	IRF8	ITGB2	LY86	LYN	RASGRP3	SAMSN1	SPI1	TYROBP	21
Hematological System Development and Function	quantity of myeloid cells	1.15e-15		0.025		C1QA	C3AR1	CCL3L1/CCL3L3	CLEC7A	CMKLR1	CSF1R	CSF3R	FCGR2A	FCGR2B	IGF1	INPP5D	IRF8	ITGAM	ITGB2	LYN	PIK3CG	RUNX1	SELPLG	SPI1	STAT3	TF	TYROBP	22
Tissue Morphology	quantity of myeloid cells	1.15e-15		0.025		C1QA	C3AR1	CCL3L1/CCL3L3	CLEC7A	CMKLR1	CSF1R	CSF3R	FCGR2A	FCGR2B	IGF1	INPP5D	IRF8	ITGAM	ITGB2	LYN	PIK3CG	RUNX1	SELPLG	SPI1	STAT3	TF	TYROBP	22
Cellular Movement	migration of cells	1.26e-15	Increased	4.666	bias	ABI3	C3AR1	CCL3L1/CCL3L3	CD9	CHI3L1	CLDN11	CLEC5A	CLEC7A	CMKLR1	CSF1R	CSF3R	CTSS	CTSZ	FCER1G	FCGR2A	FCGR2B	GFAP	GRN	IGF1	IGFBP5	INPP5D	ITGAM	ITGAX	ITGB2	ITGB5	KLK6	LAG3	LCP1	LCP2	LYN	MAFB	MSN	MYO1F	NCKAP1L	OSMR	PIK3CG	RUNX1	S1PR3	SELPLG	SERPINA3	SPI1	STAT3	TLR7	TREM2
Cell-To-Cell Signaling and Interaction	response of antigen presenting cells	1.57e-15	Increased	2.823	bias	CD68	CLEC7A	CTSS	FCER1G	FCGR2A	FCGR2B	Gp49a/Lilrb4	INPP5D	IRF8	ITGAM	ITGB2	LYN	PIK3CG	SPI1	STAT3	TLR7	TREM2	17
Cell-To-Cell Signaling and Interaction	immune response of phagocytes	2.07e-15	Increased	2.289	bias	CLEC5A	FCER1G	FCGR2A	FCGR2B	INPP5D	IRF8	ITGAM	ITGAX	ITGB2	LYN	PIK3CG	SELPLG	SPI1	STAT3	TLR7	TREM2	TYROBP	17
Inflammatory Response	immune response of phagocytes	2.07e-15	Increased	2.289	bias	CLEC5A	FCER1G	FCGR2A	FCGR2B	INPP5D	IRF8	ITGAM	ITGAX	ITGB2	LYN	PIK3CG	SELPLG	SPI1	STAT3	TLR7	TREM2	TYROBP	17
Inflammatory Response	cell movement of phagocytes	2.5e-15	Increased	3.784	bias	C3AR1	CCL3L1/CCL3L3	CD9	CMKLR1	CSF1R	CSF3R	CTSS	CTSZ	FCER1G	FCGR2A	GRN	INPP5D	ITGAM	ITGAX	ITGB2	LYN	MYO1F	NCKAP1L	PIK3CG	S1PR3	SELPLG	SERPINA3	SPI1	STAT3	TREM2	TYROBP	26
Hematological System Development and Function	cell movement of phagocytes	2.5e-15	Increased	3.784	bias	C3AR1	CCL3L1/CCL3L3	CD9	CMKLR1	CSF1R	CSF3R	CTSS	CTSZ	FCER1G	FCGR2A	GRN	INPP5D	ITGAM	ITGAX	ITGB2	LYN	MYO1F	NCKAP1L	PIK3CG	S1PR3	SELPLG	SERPINA3	SPI1	STAT3	TREM2	TYROBP	26
Cellular Movement	cell movement of phagocytes	2.5e-15	Increased	3.784	bias	C3AR1	CCL3L1/CCL3L3	CD9	CMKLR1	CSF1R	CSF3R	CTSS	CTSZ	FCER1G	FCGR2A	GRN	INPP5D	ITGAM	ITGAX	ITGB2	LYN	MYO1F	NCKAP1L	PIK3CG	S1PR3	SELPLG	SERPINA3	SPI1	STAT3	TREM2	TYROBP	26
Immune Cell Trafficking	cell movement of phagocytes	2.5e-15	Increased	3.784	bias	C3AR1	CCL3L1/CCL3L3	CD9	CMKLR1	CSF1R	CSF3R	CTSS	CTSZ	FCER1G	FCGR2A	GRN	INPP5D	ITGAM	ITGAX	ITGB2	LYN	MYO1F	NCKAP1L	PIK3CG	S1PR3	SELPLG	SERPINA3	SPI1	STAT3	TREM2	TYROBP	26
Cell-To-Cell Signaling and Interaction	activation of mononuclear leukocytes	2.54e-15		0.147	bias	B2M	C1QA	C3AR1	CD180	CLEC5A	CLEC7A	FCER1G	FCGR2A	FCGR2B	IGF1	INPP5D	IRF8	ITGAM	ITGB2	LAG3	LAPTM5	LYN	PIK3CG	RUNX1	SAMSN1	SLC11A1	STAT3	TLR7	TYROBP	24
Inflammatory Response	activation of mononuclear leukocytes	2.54e-15		0.147	bias	B2M	C1QA	C3AR1	CD180	CLEC5A	CLEC7A	FCER1G	FCGR2A	FCGR2B	IGF1	INPP5D	IRF8	ITGAM	ITGB2	LAG3	LAPTM5	LYN	PIK3CG	RUNX1	SAMSN1	SLC11A1	STAT3	TLR7	TYROBP	24
Hematological System Development and Function	activation of mononuclear leukocytes	2.54e-15		0.147	bias	B2M	C1QA	C3AR1	CD180	CLEC5A	CLEC7A	FCER1G	FCGR2A	FCGR2B	IGF1	INPP5D	IRF8	ITGAM	ITGB2	LAG3	LAPTM5	LYN	PIK3CG	RUNX1	SAMSN1	SLC11A1	STAT3	TLR7	TYROBP	24
Immune Cell Trafficking	activation of mononuclear leukocytes	2.54e-15		0.147	bias	B2M	C1QA	C3AR1	CD180	CLEC5A	CLEC7A	FCER1G	FCGR2A	FCGR2B	IGF1	INPP5D	IRF8	ITGAM	ITGB2	LAG3	LAPTM5	LYN	PIK3CG	RUNX1	SAMSN1	SLC11A1	STAT3	TLR7	TYROBP	24
Cell Morphology	morphology of leukocytes	2.76e-15	Decreased	-2.425	bias	B2M	CD84	CHI3L1	CMKLR1	CSF1R	CSF3R	CTSD	CTSZ	FCER1G	FCGR2B	Gp49a/Lilrb4	HEXB	HLA-B	INPP5D	IRF8	ITGAM	ITGB2	LCP2	LYN	MAN2B1	PIK3CG	SPI1	22
Cell-To-Cell Signaling and Interaction	response of myeloid cells	2.96e-15	Increased	2.521	bias	CLEC5A	FCER1G	FCGR2A	FCGR2B	INPP5D	IRF8	ITGAM	ITGAX	ITGB2	LYN	PIK3CG	SELPLG	SPI1	STAT3	TLR7	TREM2	TYROBP	17
Inflammatory Response	chemotaxis of leukocytes	9.25e-15	Increased	3.254	bias	C3AR1	CCL3L1/CCL3L3	CD9	CMKLR1	CSF1R	CSF3R	FCER1G	FCGR2A	GRN	INPP5D	ITGAM	ITGB2	LCP1	LYN	MYO1F	NCKAP1L	PIK3CG	S1PR3	SELPLG	SERPINA3	SPI1	21
Hematological System Development and Function	chemotaxis of leukocytes	9.25e-15	Increased	3.254	bias	C3AR1	CCL3L1/CCL3L3	CD9	CMKLR1	CSF1R	CSF3R	FCER1G	FCGR2A	GRN	INPP5D	ITGAM	ITGB2	LCP1	LYN	MYO1F	NCKAP1L	PIK3CG	S1PR3	SELPLG	SERPINA3	SPI1	21
Cellular Movement	chemotaxis of leukocytes	9.25e-15	Increased	3.254	bias	C3AR1	CCL3L1/CCL3L3	CD9	CMKLR1	CSF1R	CSF3R	FCER1G	FCGR2A	GRN	INPP5D	ITGAM	ITGB2	LCP1	LYN	MYO1F	NCKAP1L	PIK3CG	S1PR3	SELPLG	SERPINA3	SPI1	21
Immune Cell Trafficking	chemotaxis of leukocytes	9.25e-15	Increased	3.254	bias	C3AR1	CCL3L1/CCL3L3	CD9	CMKLR1	CSF1R	CSF3R	FCER1G	FCGR2A	GRN	INPP5D	ITGAM	ITGB2	LCP1	LYN	MYO1F	NCKAP1L	PIK3CG	S1PR3	SELPLG	SERPINA3	SPI1	21
Cell-To-Cell Signaling and Interaction	activation of lymphocytes	9.88e-15		0.044	bias	B2M	C1QA	C3AR1	CD180	CLEC7A	FCER1G	FCGR2A	FCGR2B	IGF1	INPP5D	IRF8	ITGAM	ITGB2	LAG3	LAPTM5	LYN	PIK3CG	RUNX1	SAMSN1	SLC11A1	STAT3	TLR7	TYROBP	23
Inflammatory Response	activation of lymphocytes	9.88e-15		0.044	bias	B2M	C1QA	C3AR1	CD180	CLEC7A	FCER1G	FCGR2A	FCGR2B	IGF1	INPP5D	IRF8	ITGAM	ITGB2	LAG3	LAPTM5	LYN	PIK3CG	RUNX1	SAMSN1	SLC11A1	STAT3	TLR7	TYROBP	23
Hematological System Development and Function	activation of lymphocytes	9.88e-15		0.044	bias	B2M	C1QA	C3AR1	CD180	CLEC7A	FCER1G	FCGR2A	FCGR2B	IGF1	INPP5D	IRF8	ITGAM	ITGB2	LAG3	LAPTM5	LYN	PIK3CG	RUNX1	SAMSN1	SLC11A1	STAT3	TLR7	TYROBP	23
Immune Cell Trafficking	activation of lymphocytes	9.88e-15		0.044	bias	B2M	C1QA	C3AR1	CD180	CLEC7A	FCER1G	FCGR2A	FCGR2B	IGF1	INPP5D	IRF8	ITGAM	ITGB2	LAG3	LAPTM5	LYN	PIK3CG	RUNX1	SAMSN1	SLC11A1	STAT3	TLR7	TYROBP	23
Immunological Disease	insulin-dependent diabetes mellitus	1.3e-14				B2M	C3AR1	CCL3L1/CCL3L3	CD180	CD84	CTSS	FCER1G	FCGR2A	FCGR2B	Gp49a/Lilrb4	GPNMB	HLA-B	IGF1	ITGAX	ITGB2	LCP1	LY86	MYO1F	NAIP	Oasl2	PLD4	PLEK	TYROBP	23
Endocrine System Disorders	insulin-dependent diabetes mellitus	1.3e-14				B2M	C3AR1	CCL3L1/CCL3L3	CD180	CD84	CTSS	FCER1G	FCGR2A	FCGR2B	Gp49a/Lilrb4	GPNMB	HLA-B	IGF1	ITGAX	ITGB2	LCP1	LY86	MYO1F	NAIP	Oasl2	PLD4	PLEK	TYROBP	23
Gastrointestinal Disease	insulin-dependent diabetes mellitus	1.3e-14				B2M	C3AR1	CCL3L1/CCL3L3	CD180	CD84	CTSS	FCER1G	FCGR2A	FCGR2B	Gp49a/Lilrb4	GPNMB	HLA-B	IGF1	ITGAX	ITGB2	LCP1	LY86	MYO1F	NAIP	Oasl2	PLD4	PLEK	TYROBP	23
Metabolic Disease	insulin-dependent diabetes mellitus	1.3e-14				B2M	C3AR1	CCL3L1/CCL3L3	CD180	CD84	CTSS	FCER1G	FCGR2A	FCGR2B	Gp49a/Lilrb4	GPNMB	HLA-B	IGF1	ITGAX	ITGB2	LCP1	LY86	MYO1F	NAIP	Oasl2	PLD4	PLEK	TYROBP	23
Tissue Morphology	quantity of cells	1.41e-14	Increased	2.18	bias	B2M	BCL2A1	C1QA	C3AR1	CCL3L1/CCL3L3	CD180	Cd33	CD84	CD9	CHI3L1	CLEC7A	CMKLR1	CSF1R	CSF3R	CTSD	CTSS	FCER1G	FCGR2A	FCGR2B	Gp49a/Lilrb4	HEXB	HLA-B	IGF1	IGFBP5	INPP5D	IRF8	ITGAM	ITGB2	LAG3	LCP2	LYN	MAFB	PIK3CG	PLEK	RASGRP3	RUNX1	S1PR3	SAMSN1	SELPLG	SLC14A1	SPI1	STAT3	TF	TYROBP
Hematological System Development and Function	quantity of granulocytes	1.46e-14		-0.6		C1QA	C3AR1	CCL3L1/CCL3L3	CLEC7A	CMKLR1	CSF1R	CSF3R	FCGR2A	FCGR2B	INPP5D	IRF8	ITGAM	ITGB2	LYN	PIK3CG	RUNX1	SELPLG	SPI1	STAT3	TF	20
Tissue Morphology	quantity of granulocytes	1.46e-14		-0.6		C1QA	C3AR1	CCL3L1/CCL3L3	CLEC7A	CMKLR1	CSF1R	CSF3R	FCGR2A	FCGR2B	INPP5D	IRF8	ITGAM	ITGB2	LYN	PIK3CG	RUNX1	SELPLG	SPI1	STAT3	TF	20
Cell Morphology	morphology of blood cells	2.12e-14	Decreased	-2.425	bias	B2M	CD84	CHI3L1	CMKLR1	CSF1R	CSF3R	CTSD	CTSZ	FCER1G	FCGR2B	Gp49a/Lilrb4	HEXB	HLA-B	INPP5D	IRF8	ITGAM	ITGB2	LCP2	LYN	MAN2B1	NCKAP1L	PIK3CG	SPI1	23
Inflammatory Response	chemotaxis of phagocytes	3.66e-14	Increased	2.987	bias	C3AR1	CCL3L1/CCL3L3	CD9	CMKLR1	CSF1R	CSF3R	FCER1G	FCGR2A	GRN	INPP5D	ITGAM	ITGB2	LYN	MYO1F	NCKAP1L	PIK3CG	SELPLG	SERPINA3	SPI1	19
Hematological System Development and Function	chemotaxis of phagocytes	3.66e-14	Increased	2.987	bias	C3AR1	CCL3L1/CCL3L3	CD9	CMKLR1	CSF1R	CSF3R	FCER1G	FCGR2A	GRN	INPP5D	ITGAM	ITGB2	LYN	MYO1F	NCKAP1L	PIK3CG	SELPLG	SERPINA3	SPI1	19
Cellular Movement	chemotaxis of phagocytes	3.66e-14	Increased	2.987	bias	C3AR1	CCL3L1/CCL3L3	CD9	CMKLR1	CSF1R	CSF3R	FCER1G	FCGR2A	GRN	INPP5D	ITGAM	ITGB2	LYN	MYO1F	NCKAP1L	PIK3CG	SELPLG	SERPINA3	SPI1	19
Immune Cell Trafficking	chemotaxis of phagocytes	3.66e-14	Increased	2.987	bias	C3AR1	CCL3L1/CCL3L3	CD9	CMKLR1	CSF1R	CSF3R	FCER1G	FCGR2A	GRN	INPP5D	ITGAM	ITGB2	LYN	MYO1F	NCKAP1L	PIK3CG	SELPLG	SERPINA3	SPI1	19
Inflammatory Response	quantity of neutrophils	7.11e-14		-0.76		C1QA	C3AR1	CCL3L1/CCL3L3	CLEC7A	CMKLR1	CSF3R	FCGR2A	FCGR2B	INPP5D	ITGAM	ITGB2	LYN	PIK3CG	SELPLG	SPI1	STAT3	TF	17
Hematological System Development and Function	quantity of neutrophils	7.11e-14		-0.76		C1QA	C3AR1	CCL3L1/CCL3L3	CLEC7A	CMKLR1	CSF3R	FCGR2A	FCGR2B	INPP5D	ITGAM	ITGB2	LYN	PIK3CG	SELPLG	SPI1	STAT3	TF	17
Tissue Morphology	quantity of neutrophils	7.11e-14		-0.76		C1QA	C3AR1	CCL3L1/CCL3L3	CLEC7A	CMKLR1	CSF3R	FCGR2A	FCGR2B	INPP5D	ITGAM	ITGB2	LYN	PIK3CG	SELPLG	SPI1	STAT3	TF	17
Inflammatory Response	chemotaxis of neutrophils	7.22e-14	Increased	2.736	bias	C3AR1	CCL3L1/CCL3L3	CSF3R	FCER1G	FCGR2A	GRN	INPP5D	ITGAM	ITGB2	LYN	MYO1F	NCKAP1L	PIK3CG	SELPLG	SPI1	15
Hematological System Development and Function	chemotaxis of neutrophils	7.22e-14	Increased	2.736	bias	C3AR1	CCL3L1/CCL3L3	CSF3R	FCER1G	FCGR2A	GRN	INPP5D	ITGAM	ITGB2	LYN	MYO1F	NCKAP1L	PIK3CG	SELPLG	SPI1	15
Cellular Movement	chemotaxis of neutrophils	7.22e-14	Increased	2.736	bias	C3AR1	CCL3L1/CCL3L3	CSF3R	FCER1G	FCGR2A	GRN	INPP5D	ITGAM	ITGB2	LYN	MYO1F	NCKAP1L	PIK3CG	SELPLG	SPI1	15
Immune Cell Trafficking	chemotaxis of neutrophils	7.22e-14	Increased	2.736	bias	C3AR1	CCL3L1/CCL3L3	CSF3R	FCER1G	FCGR2A	GRN	INPP5D	ITGAM	ITGB2	LYN	MYO1F	NCKAP1L	PIK3CG	SELPLG	SPI1	15
Inflammatory Response	antibody response	1.04e-13		1.066	bias	CD180	CD37	CTSS	Ggta1	HLA-B	IRF8	LCP1	LCP2	LY86	LYN	RASGRP3	STAT3	TLR7	TREM2	TYROBP	15
Cellular Movement	homing of cells	1.73e-13	Increased	3.123	bias	C3AR1	CCL3L1/CCL3L3	CD9	CMKLR1	CSF1R	CSF3R	FCER1G	FCGR2A	GRN	IGF1	INPP5D	ITGAM	ITGB2	LCP1	LYN	MYO1F	NCKAP1L	PIK3CG	RUNX1	S1PR3	SELPLG	SERPINA3	SPI1	STAT3	24
Inflammatory Response	chemotaxis of myeloid cells	2.2e-13	Increased	2.817	bias	C3AR1	CCL3L1/CCL3L3	CMKLR1	CSF1R	CSF3R	FCER1G	FCGR2A	GRN	INPP5D	ITGAM	ITGB2	LYN	MYO1F	NCKAP1L	PIK3CG	SELPLG	SERPINA3	SPI1	18
Hematological System Development and Function	chemotaxis of myeloid cells	2.2e-13	Increased	2.817	bias	C3AR1	CCL3L1/CCL3L3	CMKLR1	CSF1R	CSF3R	FCER1G	FCGR2A	GRN	INPP5D	ITGAM	ITGB2	LYN	MYO1F	NCKAP1L	PIK3CG	SELPLG	SERPINA3	SPI1	18
Cellular Movement	chemotaxis of myeloid cells	2.2e-13	Increased	2.817	bias	C3AR1	CCL3L1/CCL3L3	CMKLR1	CSF1R	CSF3R	FCER1G	FCGR2A	GRN	INPP5D	ITGAM	ITGB2	LYN	MYO1F	NCKAP1L	PIK3CG	SELPLG	SERPINA3	SPI1	18
Immune Cell Trafficking	chemotaxis of myeloid cells	2.2e-13	Increased	2.817	bias	C3AR1	CCL3L1/CCL3L3	CMKLR1	CSF1R	CSF3R	FCER1G	FCGR2A	GRN	INPP5D	ITGAM	ITGB2	LYN	MYO1F	NCKAP1L	PIK3CG	SELPLG	SERPINA3	SPI1	18
Inflammatory Response	immune response of cells	3.11e-13	Increased	3.067	bias	C1QA	CD68	CLEC7A	CSF3R	FCER1G	FCGR2A	FCGR2B	Gp49a/Lilrb4	INPP5D	IRF8	ITGAM	ITGAX	ITGB2	LYN	PIK3CG	SELPLG	SLC11A1	SPI1	TREM2	19
Inflammatory Response	phagocytosis	3.52e-13	Increased	3	bias	C1QA	CLEC7A	CSF3R	FCER1G	FCGR2A	FCGR2B	INPP5D	IRF8	ITGAM	ITGAX	ITGB2	ITGB5	LYN	MSN	SELPLG	SLC11A1	SPI1	TREM2	18
Cellular Function and Maintenance	phagocytosis	3.52e-13	Increased	3	bias	C1QA	CLEC7A	CSF3R	FCER1G	FCGR2A	FCGR2B	INPP5D	IRF8	ITGAM	ITGAX	ITGB2	ITGB5	LYN	MSN	SELPLG	SLC11A1	SPI1	TREM2	18
Hematological System Development and Function	quantity of T lymphocytes	4.39e-13	Increased	3.346	bias	B2M	BCL2A1	CD84	CHI3L1	CMKLR1	CTSD	CTSS	FCER1G	FCGR2B	HEXB	HLA-B	IGF1	INPP5D	IRF8	ITGAM	ITGB2	LAG3	LCP2	LYN	PIK3CG	RUNX1	SELPLG	SPI1	STAT3	24
Tissue Morphology	quantity of T lymphocytes	4.39e-13	Increased	3.346	bias	B2M	BCL2A1	CD84	CHI3L1	CMKLR1	CTSD	CTSS	FCER1G	FCGR2B	HEXB	HLA-B	IGF1	INPP5D	IRF8	ITGAM	ITGB2	LAG3	LCP2	LYN	PIK3CG	RUNX1	SELPLG	SPI1	STAT3	24
Hematological System Development and Function	function of myeloid cells	4.66e-13				BCL2A1	C3AR1	CD9	CLEC7A	CSF1R	FCER1G	FCGR2A	FCGR2B	GRN	ITGAM	ITGB2	LCP1	LYN	PIK3CG	STAT3	TREM2	TYROBP	17
Cellular Function and Maintenance	function of myeloid cells	4.66e-13				BCL2A1	C3AR1	CD9	CLEC7A	CSF1R	FCER1G	FCGR2A	FCGR2B	GRN	ITGAM	ITGB2	LCP1	LYN	PIK3CG	STAT3	TREM2	TYROBP	17
Cardiovascular Disease	peripheral arterial occlusive disease	6.54e-13				B2M	C3AR1	CD53	CTSS	FCGR2A	IGFBP5	IRF8	LAPTM5	LCP1	LYN	MAFB	RASGRP3	RUNX1	SAMSN1	SLCO2B1	TLR7	16
Hematological System Development and Function	development of leukocytes	1.1e-12	Increased	3.17	bias	B2M	BCL2A1	C3AR1	CD9	CSF1R	CSF3R	FCER1G	FCGR2A	FCGR2B	IGF1	INPP5D	IRF8	ITGB2	LCP2	LYN	MAFB	NCKAP1L	PIK3CG	RASGRP3	RUNX1	SPI1	STAT3	TLR7	TYROBP	24
Cellular Development	development of leukocytes	1.1e-12	Increased	3.17	bias	B2M	BCL2A1	C3AR1	CD9	CSF1R	CSF3R	FCER1G	FCGR2A	FCGR2B	IGF1	INPP5D	IRF8	ITGB2	LCP2	LYN	MAFB	NCKAP1L	PIK3CG	RASGRP3	RUNX1	SPI1	STAT3	TLR7	TYROBP	24
Hematopoiesis	development of leukocytes	1.1e-12	Increased	3.17	bias	B2M	BCL2A1	C3AR1	CD9	CSF1R	CSF3R	FCER1G	FCGR2A	FCGR2B	IGF1	INPP5D	IRF8	ITGB2	LCP2	LYN	MAFB	NCKAP1L	PIK3CG	RASGRP3	RUNX1	SPI1	STAT3	TLR7	TYROBP	24
Lymphoid Tissue Structure and Development	development of leukocytes	1.1e-12	Increased	3.17	bias	B2M	BCL2A1	C3AR1	CD9	CSF1R	CSF3R	FCER1G	FCGR2A	FCGR2B	IGF1	INPP5D	IRF8	ITGB2	LCP2	LYN	MAFB	NCKAP1L	PIK3CG	RASGRP3	RUNX1	SPI1	STAT3	TLR7	TYROBP	24
Hematological System Development and Function	cell movement of myeloid cells	1.11e-12	Increased	3.356	bias	C3AR1	CCL3L1/CCL3L3	CMKLR1	CSF1R	CSF3R	CTSS	FCER1G	FCGR2A	GRN	INPP5D	ITGAM	ITGAX	ITGB2	LYN	MYO1F	NCKAP1L	PIK3CG	SELPLG	SERPINA3	SPI1	STAT3	TREM2	TYROBP	23
Cellular Movement	cell movement of myeloid cells	1.11e-12	Increased	3.356	bias	C3AR1	CCL3L1/CCL3L3	CMKLR1	CSF1R	CSF3R	CTSS	FCER1G	FCGR2A	GRN	INPP5D	ITGAM	ITGAX	ITGB2	LYN	MYO1F	NCKAP1L	PIK3CG	SELPLG	SERPINA3	SPI1	STAT3	TREM2	TYROBP	23
Immune Cell Trafficking	cell movement of myeloid cells	1.11e-12	Increased	3.356	bias	C3AR1	CCL3L1/CCL3L3	CMKLR1	CSF1R	CSF3R	CTSS	FCER1G	FCGR2A	GRN	INPP5D	ITGAM	ITGAX	ITGB2	LYN	MYO1F	NCKAP1L	PIK3CG	SELPLG	SERPINA3	SPI1	STAT3	TREM2	TYROBP	23
Hematological System Development and Function	proliferation of T lymphocytes	1.35e-12		0.062		B2M	C10orf54	CD37	CD84	CTSD	CTSZ	FCER1G	FCGR2B	IGF1	INPP5D	ITGAM	ITGAX	ITGB2	LAG3	LAPTM5	LCP2	NCKAP1L	PIK3CG	RASGRP3	RUNX1	SAMSN1	SPI1	STAT3	TYROBP	24
Cellular Development	proliferation of T lymphocytes	1.35e-12		0.062		B2M	C10orf54	CD37	CD84	CTSD	CTSZ	FCER1G	FCGR2B	IGF1	INPP5D	ITGAM	ITGAX	ITGB2	LAG3	LAPTM5	LCP2	NCKAP1L	PIK3CG	RASGRP3	RUNX1	SAMSN1	SPI1	STAT3	TYROBP	24
Cellular Growth and Proliferation	proliferation of T lymphocytes	1.35e-12		0.062		B2M	C10orf54	CD37	CD84	CTSD	CTSZ	FCER1G	FCGR2B	IGF1	INPP5D	ITGAM	ITGAX	ITGB2	LAG3	LAPTM5	LCP2	NCKAP1L	PIK3CG	RASGRP3	RUNX1	SAMSN1	SPI1	STAT3	TYROBP	24
Hematological System Development and Function	development of blood cells	1.68e-12	Increased	3.767	bias	B2M	BCL2A1	C3AR1	CD9	CSF1R	CSF3R	FCER1G	FCGR2A	FCGR2B	IGF1	INPP5D	IRF8	ITGB2	LCP2	LYN	MAFB	MYO1E	NCKAP1L	PIK3CG	RASGRP3	RUNX1	SPI1	STAT3	TLR7	TYROBP	25
Cellular Development	development of blood cells	1.68e-12	Increased	3.767	bias	B2M	BCL2A1	C3AR1	CD9	CSF1R	CSF3R	FCER1G	FCGR2A	FCGR2B	IGF1	INPP5D	IRF8	ITGB2	LCP2	LYN	MAFB	MYO1E	NCKAP1L	PIK3CG	RASGRP3	RUNX1	SPI1	STAT3	TLR7	TYROBP	25
Hematopoiesis	development of blood cells	1.68e-12	Increased	3.767	bias	B2M	BCL2A1	C3AR1	CD9	CSF1R	CSF3R	FCER1G	FCGR2A	FCGR2B	IGF1	INPP5D	IRF8	ITGB2	LCP2	LYN	MAFB	MYO1E	NCKAP1L	PIK3CG	RASGRP3	RUNX1	SPI1	STAT3	TLR7	TYROBP	25
Endocrine System Disorders	diabetes mellitus	1.76e-12		0.742		B2M	C3AR1	CCL3L1/CCL3L3	CD180	CD84	CHI3L1	CTSS	FCER1G	FCGR2A	FCGR2B	GFAP	Gp49a/Lilrb4	GPNMB	HLA-B	IGF1	ITGAX	ITGB2	LCP1	LY86	MYO1F	NAIP	Oasl2	PLD4	PLEK	SERPINA3	STAT3	TF	TYROBP	28
Gastrointestinal Disease	diabetes mellitus	1.76e-12		0.742		B2M	C3AR1	CCL3L1/CCL3L3	CD180	CD84	CHI3L1	CTSS	FCER1G	FCGR2A	FCGR2B	GFAP	Gp49a/Lilrb4	GPNMB	HLA-B	IGF1	ITGAX	ITGB2	LCP1	LY86	MYO1F	NAIP	Oasl2	PLD4	PLEK	SERPINA3	STAT3	TF	TYROBP	28
Metabolic Disease	diabetes mellitus	1.76e-12		0.742		B2M	C3AR1	CCL3L1/CCL3L3	CD180	CD84	CHI3L1	CTSS	FCER1G	FCGR2A	FCGR2B	GFAP	Gp49a/Lilrb4	GPNMB	HLA-B	IGF1	ITGAX	ITGB2	LCP1	LY86	MYO1F	NAIP	Oasl2	PLD4	PLEK	SERPINA3	STAT3	TF	TYROBP	28
Hematological System Development and Function	function of lymphocytes	2.46e-12				B2M	C3AR1	CD84	CHI3L1	CTSS	FCER1G	FCGR2A	GPR84	HLA-B	INPP5D	IRF8	LAG3	LCP1	LYN	PIK3CG	S1PR3	SAMSN1	STAT3	TYROBP	19
Cellular Function and Maintenance	function of lymphocytes	2.46e-12				B2M	C3AR1	CD84	CHI3L1	CTSS	FCER1G	FCGR2A	GPR84	HLA-B	INPP5D	IRF8	LAG3	LCP1	LYN	PIK3CG	S1PR3	SAMSN1	STAT3	TYROBP	19
Cell-To-Cell Signaling and Interaction	immune response of antigen presenting cells	2.65e-12	Increased	2.469	bias	CD68	CTSS	FCER1G	FCGR2A	FCGR2B	Gp49a/Lilrb4	INPP5D	IRF8	ITGAM	ITGB2	LYN	SPI1	TLR7	TREM2	14
Inflammatory Response	immune response of antigen presenting cells	2.65e-12	Increased	2.469	bias	CD68	CTSS	FCER1G	FCGR2A	FCGR2B	Gp49a/Lilrb4	INPP5D	IRF8	ITGAM	ITGB2	LYN	SPI1	TLR7	TREM2	14
Cellular Movement	chemotaxis of cells	3.05e-12	Increased	3.202	bias	C3AR1	CCL3L1/CCL3L3	CD9	CMKLR1	CSF1R	CSF3R	FCER1G	FCGR2A	GRN	IGF1	INPP5D	ITGAM	ITGB2	LCP1	LYN	MYO1F	NCKAP1L	PIK3CG	S1PR3	SELPLG	SERPINA3	SPI1	22
Inflammatory Response	morphology of phagocytes	5.08e-12				CHI3L1	CMKLR1	CSF1R	CSF3R	CTSD	CTSZ	FCGR2B	HEXB	ITGAM	ITGB2	MAN2B1	PIK3CG	SPI1	13
Cell Morphology	morphology of phagocytes	5.08e-12				CHI3L1	CMKLR1	CSF1R	CSF3R	CTSD	CTSZ	FCGR2B	HEXB	ITGAM	ITGB2	MAN2B1	PIK3CG	SPI1	13
Cell-To-Cell Signaling and Interaction	activation of phagocytes	6.9e-12	Increased	2.318	bias	CHI3L1	CLEC5A	CLEC7A	CSF1R	FCER1G	FCGR2A	GRN	IGF1	ITGAM	ITGB2	LCP2	LYN	SLC11A1	STAT3	TLR7	TREM2	TYROBP	17
Inflammatory Response	activation of phagocytes	6.9e-12	Increased	2.318	bias	CHI3L1	CLEC5A	CLEC7A	CSF1R	FCER1G	FCGR2A	GRN	IGF1	ITGAM	ITGB2	LCP2	LYN	SLC11A1	STAT3	TLR7	TREM2	TYROBP	17
Hematological System Development and Function	activation of phagocytes	6.9e-12	Increased	2.318	bias	CHI3L1	CLEC5A	CLEC7A	CSF1R	FCER1G	FCGR2A	GRN	IGF1	ITGAM	ITGB2	LCP2	LYN	SLC11A1	STAT3	TLR7	TREM2	TYROBP	17
Immune Cell Trafficking	activation of phagocytes	6.9e-12	Increased	2.318	bias	CHI3L1	CLEC5A	CLEC7A	CSF1R	FCER1G	FCGR2A	GRN	IGF1	ITGAM	ITGB2	LCP2	LYN	SLC11A1	STAT3	TLR7	TREM2	TYROBP	17
Inflammatory Response	cell movement of neutrophils	7.65e-12	Increased	2.648	bias	C3AR1	CCL3L1/CCL3L3	CMKLR1	CSF3R	FCER1G	FCGR2A	GRN	INPP5D	ITGAM	ITGB2	LYN	MYO1F	NCKAP1L	PIK3CG	SELPLG	SPI1	STAT3	17
Hematological System Development and Function	cell movement of neutrophils	7.65e-12	Increased	2.648	bias	C3AR1	CCL3L1/CCL3L3	CMKLR1	CSF3R	FCER1G	FCGR2A	GRN	INPP5D	ITGAM	ITGB2	LYN	MYO1F	NCKAP1L	PIK3CG	SELPLG	SPI1	STAT3	17
Cellular Movement	cell movement of neutrophils	7.65e-12	Increased	2.648	bias	C3AR1	CCL3L1/CCL3L3	CMKLR1	CSF3R	FCER1G	FCGR2A	GRN	INPP5D	ITGAM	ITGB2	LYN	MYO1F	NCKAP1L	PIK3CG	SELPLG	SPI1	STAT3	17
Immune Cell Trafficking	cell movement of neutrophils	7.65e-12	Increased	2.648	bias	C3AR1	CCL3L1/CCL3L3	CMKLR1	CSF3R	FCER1G	FCGR2A	GRN	INPP5D	ITGAM	ITGB2	LYN	MYO1F	NCKAP1L	PIK3CG	SELPLG	SPI1	STAT3	17
Inflammatory Response	degranulation of phagocytes	8.64e-12		0.346	bias	C3AR1	CCL3L1/CCL3L3	CD9	FCER1G	FCGR2A	FCGR2B	Gp49a/Lilrb4	INPP5D	ITGB2	LCP2	LYN	MYO1F	PIK3CG	13
Cellular Compromise	degranulation of phagocytes	8.64e-12		0.346	bias	C3AR1	CCL3L1/CCL3L3	CD9	FCER1G	FCGR2A	FCGR2B	Gp49a/Lilrb4	INPP5D	ITGB2	LCP2	LYN	MYO1F	PIK3CG	13
Cell-To-Cell Signaling and Interaction	phagocytosis of cells	8.65e-12	Increased	2.846	bias	C1QA	CLEC7A	CSF3R	FCER1G	FCGR2A	FCGR2B	INPP5D	IRF8	ITGAM	ITGAX	ITGB2	LYN	SELPLG	SLC11A1	SPI1	TREM2	16
Inflammatory Response	phagocytosis of cells	8.65e-12	Increased	2.846	bias	C1QA	CLEC7A	CSF3R	FCER1G	FCGR2A	FCGR2B	INPP5D	IRF8	ITGAM	ITGAX	ITGB2	LYN	SELPLG	SLC11A1	SPI1	TREM2	16
Cellular Function and Maintenance	phagocytosis of cells	8.65e-12	Increased	2.846	bias	C1QA	CLEC7A	CSF3R	FCER1G	FCGR2A	FCGR2B	INPP5D	IRF8	ITGAM	ITGAX	ITGB2	LYN	SELPLG	SLC11A1	SPI1	TREM2	16
Inflammatory Response	inflammation of organ	1.11e-11		-1.115	bias	B2M	C10orf54	C1QA	C3AR1	CCL3L1/CCL3L3	CLEC7A	CMKLR1	CSF1R	CTSS	FCER1G	FCGR2A	FCGR2B	GFAP	HLA-B	IGF1	INPP5D	ITGAM	ITGAX	ITGB2	KLK6	LCP2	LYN	MSN	OSMR	PIK3CG	SPI1	STAT3	TF	TLR7	TYROBP	UNC93B1	31
Cardiovascular Disease	occlusion of artery	1.14e-11	Increased	2.207	bias	B2M	C3AR1	CCL3L1/CCL3L3	CD53	CHI3L1	CTSS	FCGR2A	IGF1	IGFBP5	IRF8	ITGAM	ITGAX	ITGB2	LAPTM5	LCP1	LYN	MAFB	PIK3CG	RASGRP3	RUNX1	SAMSN1	SLCO2B1	STAT3	TLR7	24
Hematological System Development and Function	function of macrophages	1.23e-11				CD9	CLEC7A	CSF1R	FCER1G	FCGR2A	FCGR2B	GRN	ITGAM	LCP1	LYN	PIK3CG	STAT3	TREM2	TYROBP	14
Cellular Function and Maintenance	function of macrophages	1.23e-11				CD9	CLEC7A	CSF1R	FCER1G	FCGR2A	FCGR2B	GRN	ITGAM	LCP1	LYN	PIK3CG	STAT3	TREM2	TYROBP	14
Infectious Disease	Bacterial Infection	2.03e-11		-1.172	bias	B2M	C1QA	C1QB	CCL3L1/CCL3L3	CMKLR1	FCER1G	FCGR2A	GRN	IRF8	ITGAM	ITGAX	ITGB2	LCP1	LY86	NAIP	S1PR3	SLC11A1	STAT3	UNC93B1	19
Humoral Immune Response	quantity of IgG	2.09e-11		1.046		B2M	C3AR1	CD180	CD37	CD84	CTSS	FCER1G	FCGR2B	Ggta1	ITGB2	LY86	LYN	RASGRP3	SAMSN1	TYROBP	15
Protein Synthesis	quantity of IgG	2.09e-11		1.046		B2M	C3AR1	CD180	CD37	CD84	CTSS	FCER1G	FCGR2B	Ggta1	ITGB2	LY86	LYN	RASGRP3	SAMSN1	TYROBP	15
Cell-To-Cell Signaling and Interaction	immune response of neutrophils	2.15e-11		1.24	bias	FCER1G	FCGR2A	ITGAM	ITGAX	ITGB2	LYN	PIK3CG	SELPLG	STAT3	TYROBP	10
Inflammatory Response	immune response of neutrophils	2.15e-11		1.24	bias	FCER1G	FCGR2A	ITGAM	ITGAX	ITGB2	LYN	PIK3CG	SELPLG	STAT3	TYROBP	10
Hematological System Development and Function	immune response of neutrophils	2.15e-11		1.24	bias	FCER1G	FCGR2A	ITGAM	ITGAX	ITGB2	LYN	PIK3CG	SELPLG	STAT3	TYROBP	10
Metabolic Disease	glucose metabolism disorder	2.16e-11		1.291	bias	B2M	C1QA	C3AR1	CCL3L1/CCL3L3	CD180	CD84	CHI3L1	CTSS	FCER1G	FCGR2A	FCGR2B	GFAP	Gp49a/Lilrb4	GPNMB	HLA-B	IGF1	ITGAX	ITGB2	LCP1	LY86	MYO1F	NAIP	Oasl2	PLD4	PLEK	SERPINA3	STAT3	TF	TLR7	TYROBP	30
Hematological System Development and Function	quantity of helper T lymphocytes	2.48e-11	Increased	2.005	bias	B2M	CD84	CHI3L1	FCGR2B	HLA-B	ITGAM	ITGB2	LAG3	LCP2	PIK3CG	RUNX1	SELPLG	SPI1	STAT3	14
Tissue Morphology	quantity of helper T lymphocytes	2.48e-11	Increased	2.005	bias	B2M	CD84	CHI3L1	FCGR2B	HLA-B	ITGAM	ITGB2	LAG3	LCP2	PIK3CG	RUNX1	SELPLG	SPI1	STAT3	14
Cell-To-Cell Signaling and Interaction	adhesion of phagocytes	4.58e-11	Increased	2.106	bias	CCL3L1/CCL3L3	CSF3R	CTSZ	INPP5D	ITGAM	ITGAX	ITGB2	LCP1	LYN	PIK3CG	SELPLG	SPI1	12
Inflammatory Response	adhesion of phagocytes	4.58e-11	Increased	2.106	bias	CCL3L1/CCL3L3	CSF3R	CTSZ	INPP5D	ITGAM	ITGAX	ITGB2	LCP1	LYN	PIK3CG	SELPLG	SPI1	12
Hematological System Development and Function	adhesion of phagocytes	4.58e-11	Increased	2.106	bias	CCL3L1/CCL3L3	CSF3R	CTSZ	INPP5D	ITGAM	ITGAX	ITGB2	LCP1	LYN	PIK3CG	SELPLG	SPI1	12
Immune Cell Trafficking	adhesion of phagocytes	4.58e-11	Increased	2.106	bias	CCL3L1/CCL3L3	CSF3R	CTSZ	INPP5D	ITGAM	ITGAX	ITGB2	LCP1	LYN	PIK3CG	SELPLG	SPI1	12
Tissue Development	adhesion of phagocytes	4.58e-11	Increased	2.106	bias	CCL3L1/CCL3L3	CSF3R	CTSZ	INPP5D	ITGAM	ITGAX	ITGB2	LCP1	LYN	PIK3CG	SELPLG	SPI1	12
Cell Morphology	morphology of cells	6.41e-11	Decreased	-2.483		B2M	C1QA	C3AR1	CD180	CD68	CD84	CD9	CHI3L1	CLDN11	CMKLR1	CSF1R	CSF3R	CTSD	CTSZ	FCER1G	FCGR2B	GFAP	Gp49a/Lilrb4	GRN	HEXA	HEXB	HLA-B	IGF1	IGFBP5	INPP5D	IRF8	ITGAM	ITGB2	KLK6	LCP1	LCP2	LYN	MAFB	MAN2B1	MYO1E	NCKAP1L	OSMR	PIK3CG	S1PR3	SPI1	STAT3	TYROBP	42
Cellular Function and Maintenance	Lymphocyte homeostasis	7.08e-11	Increased	2.679	bias	B2M	BCL2A1	C3AR1	FCER1G	FCGR2A	FCGR2B	IGF1	INPP5D	IRF8	ITGB2	LAG3	LCP2	LYN	NCKAP1L	PIK3CG	RASGRP3	RUNX1	SPI1	STAT3	TLR7	TYROBP	21
Cell-To-Cell Signaling and Interaction	response of macrophages	7.68e-11	Increased	2.288	bias	CLEC7A	FCER1G	FCGR2A	FCGR2B	INPP5D	IRF8	ITGAM	ITGB2	LYN	SPI1	STAT3	TREM2	12
Inflammatory Response	response of macrophages	7.68e-11	Increased	2.288	bias	CLEC7A	FCER1G	FCGR2A	FCGR2B	INPP5D	IRF8	ITGAM	ITGB2	LYN	SPI1	STAT3	TREM2	12
Cell-To-Cell Signaling and Interaction	adhesion of blood cells	7.84e-11	Increased	2.892	bias	C1QA	CCL3L1/CCL3L3	CD9	CSF3R	CTSZ	FCER1G	FCGR2A	INPP5D	ITGAM	ITGAX	ITGB2	LCP1	LYN	MSN	PIK3CG	SELPLG	SPI1	Wfdc17	18
Tissue Development	adhesion of blood cells	7.84e-11	Increased	2.892	bias	C1QA	CCL3L1/CCL3L3	CD9	CSF3R	CTSZ	FCER1G	FCGR2A	INPP5D	ITGAM	ITGAX	ITGB2	LCP1	LYN	MSN	PIK3CG	SELPLG	SPI1	Wfdc17	18
Cell-To-Cell Signaling and Interaction	phagocytosis of blood cells	8.36e-11	Increased	2.432	bias	FCER1G	FCGR2A	FCGR2B	INPP5D	IRF8	ITGAM	ITGAX	ITGB2	LYN	SELPLG	SPI1	TREM2	12
Inflammatory Response	phagocytosis of blood cells	8.36e-11	Increased	2.432	bias	FCER1G	FCGR2A	FCGR2B	INPP5D	IRF8	ITGAM	ITGAX	ITGB2	LYN	SELPLG	SPI1	TREM2	12
Cellular Function and Maintenance	phagocytosis of blood cells	8.36e-11	Increased	2.432	bias	FCER1G	FCGR2A	FCGR2B	INPP5D	IRF8	ITGAM	ITGAX	ITGB2	LYN	SELPLG	SPI1	TREM2	12
Inflammatory Response	degranulation of cells	1.02e-10		-0.245	bias	C3AR1	CCL3L1/CCL3L3	CD9	FCER1G	FCGR2A	FCGR2B	Gp49a/Lilrb4	INPP5D	ITGAM	ITGB2	LCP2	LYN	MYO1F	PIK3CG	14
Cellular Compromise	degranulation of cells	1.02e-10		-0.245	bias	C3AR1	CCL3L1/CCL3L3	CD9	FCER1G	FCGR2A	FCGR2B	Gp49a/Lilrb4	INPP5D	ITGAM	ITGB2	LCP2	LYN	MYO1F	PIK3CG	14
Cellular Growth and Proliferation	proliferation of cells	1.2e-10		1.171		B2M	BCL2A1	C10orf54	C3AR1	CCL3L1/CCL3L3	CD180	CD37	CD84	CD9	CHI3L1	CLDN11	CLEC7A	CMKLR1	CSF1R	CSF3R	CTSD	CTSS	CTSZ	FCER1G	FCGR2B	GFAP	Gp49a/Lilrb4	GPNMB	GRN	HEXB	HPGDS	IGF1	IGFBP5	INPP5D	IRF8	ITGAM	ITGAX	ITGB2	ITGB5	KLK6	LAG3	LAPTM5	LCP1	LCP2	LY86	LYN	MAFB	NAIP	NCKAP1L
Hematological System Development and Function	development of lymphocytes	1.24e-10	Increased	2.353	bias	B2M	BCL2A1	C3AR1	CSF3R	FCER1G	FCGR2A	FCGR2B	IGF1	INPP5D	IRF8	ITGB2	LCP2	LYN	NCKAP1L	PIK3CG	RASGRP3	RUNX1	SPI1	STAT3	TLR7	TYROBP	21
Cellular Development	development of lymphocytes	1.24e-10	Increased	2.353	bias	B2M	BCL2A1	C3AR1	CSF3R	FCER1G	FCGR2A	FCGR2B	IGF1	INPP5D	IRF8	ITGB2	LCP2	LYN	NCKAP1L	PIK3CG	RASGRP3	RUNX1	SPI1	STAT3	TLR7	TYROBP	21
Hematopoiesis	development of lymphocytes	1.24e-10	Increased	2.353	bias	B2M	BCL2A1	C3AR1	CSF3R	FCER1G	FCGR2A	FCGR2B	IGF1	INPP5D	IRF8	ITGB2	LCP2	LYN	NCKAP1L	PIK3CG	RASGRP3	RUNX1	SPI1	STAT3	TLR7	TYROBP	21
Lymphoid Tissue Structure and Development	development of lymphocytes	1.24e-10	Increased	2.353	bias	B2M	BCL2A1	C3AR1	CSF3R	FCER1G	FCGR2A	FCGR2B	IGF1	INPP5D	IRF8	ITGB2	LCP2	LYN	NCKAP1L	PIK3CG	RASGRP3	RUNX1	SPI1	STAT3	TLR7	TYROBP	21
Hematological System Development and Function	quantity of antigen presenting cells	1.72e-10	Increased	2.14		B2M	C3AR1	CSF1R	CTSS	FCGR2B	Gp49a/Lilrb4	IGF1	INPP5D	IRF8	ITGB2	PIK3CG	SELPLG	SPI1	STAT3	TYROBP	15
Tissue Morphology	quantity of antigen presenting cells	1.72e-10	Increased	2.14		B2M	C3AR1	CSF1R	CTSS	FCGR2B	Gp49a/Lilrb4	IGF1	INPP5D	IRF8	ITGB2	PIK3CG	SELPLG	SPI1	STAT3	TYROBP	15
Cell-To-Cell Signaling and Interaction	adhesion of immune cells	1.77e-10	Increased	2.758	bias	C1QA	CCL3L1/CCL3L3	CD9	CSF3R	CTSZ	FCGR2A	INPP5D	ITGAM	ITGAX	ITGB2	LCP1	LYN	MSN	PIK3CG	SELPLG	SPI1	Wfdc17	17
Hematological System Development and Function	adhesion of immune cells	1.77e-10	Increased	2.758	bias	C1QA	CCL3L1/CCL3L3	CD9	CSF3R	CTSZ	FCGR2A	INPP5D	ITGAM	ITGAX	ITGB2	LCP1	LYN	MSN	PIK3CG	SELPLG	SPI1	Wfdc17	17
Immune Cell Trafficking	adhesion of immune cells	1.77e-10	Increased	2.758	bias	C1QA	CCL3L1/CCL3L3	CD9	CSF3R	CTSZ	FCGR2A	INPP5D	ITGAM	ITGAX	ITGB2	LCP1	LYN	MSN	PIK3CG	SELPLG	SPI1	Wfdc17	17
Tissue Development	adhesion of immune cells	1.77e-10	Increased	2.758	bias	C1QA	CCL3L1/CCL3L3	CD9	CSF3R	CTSZ	FCGR2A	INPP5D	ITGAM	ITGAX	ITGB2	LCP1	LYN	MSN	PIK3CG	SELPLG	SPI1	Wfdc17	17
Cell-To-Cell Signaling and Interaction	activation of antigen presenting cells	1.94e-10	Increased	2.225	bias	CHI3L1	CLEC7A	CSF1R	CTSS	FCER1G	FCGR2A	HLA-B	IGF1	LYN	SLC11A1	STAT3	TLR7	TREM2	TYROBP	14
Inflammatory Response	activation of antigen presenting cells	1.94e-10	Increased	2.225	bias	CHI3L1	CLEC7A	CSF1R	CTSS	FCER1G	FCGR2A	HLA-B	IGF1	LYN	SLC11A1	STAT3	TLR7	TREM2	TYROBP	14
Hematological System Development and Function	activation of antigen presenting cells	1.94e-10	Increased	2.225	bias	CHI3L1	CLEC7A	CSF1R	CTSS	FCER1G	FCGR2A	HLA-B	IGF1	LYN	SLC11A1	STAT3	TLR7	TREM2	TYROBP	14
Immune Cell Trafficking	activation of antigen presenting cells	1.94e-10	Increased	2.225	bias	CHI3L1	CLEC7A	CSF1R	CTSS	FCER1G	FCGR2A	HLA-B	IGF1	LYN	SLC11A1	STAT3	TLR7	TREM2	TYROBP	14
Lymphoid Tissue Structure and Development	morphology of lymphatic system component	2.44e-10				CD37	CD68	CSF1R	CTSD	FCGR2B	HPGDS	IGF1	INPP5D	IRF8	ITGB2	LAG3	LCP2	LYN	MAN2B1	PIK3CG	RUNX1	S1PR3	SPI1	STAT3	TYROBP	20
Hematological System Development and Function	function of T lymphocytes	3.14e-10				B2M	C3AR1	CD84	CHI3L1	CTSS	FCER1G	GPR84	HLA-B	INPP5D	IRF8	LAG3	PIK3CG	SAMSN1	STAT3	TYROBP	15
Cellular Function and Maintenance	function of T lymphocytes	3.14e-10				B2M	C3AR1	CD84	CHI3L1	CTSS	FCER1G	GPR84	HLA-B	INPP5D	IRF8	LAG3	PIK3CG	SAMSN1	STAT3	TYROBP	15
Cell-To-Cell Signaling and Interaction	adhesion of neutrophils	3.53e-10		1.393	bias	CSF3R	INPP5D	ITGAM	ITGAX	ITGB2	LCP1	LYN	PIK3CG	SELPLG	9
Inflammatory Response	adhesion of neutrophils	3.53e-10		1.393	bias	CSF3R	INPP5D	ITGAM	ITGAX	ITGB2	LCP1	LYN	PIK3CG	SELPLG	9
Hematological System Development and Function	adhesion of neutrophils	3.53e-10		1.393	bias	CSF3R	INPP5D	ITGAM	ITGAX	ITGB2	LCP1	LYN	PIK3CG	SELPLG	9
Immune Cell Trafficking	adhesion of neutrophils	3.53e-10		1.393	bias	CSF3R	INPP5D	ITGAM	ITGAX	ITGB2	LCP1	LYN	PIK3CG	SELPLG	9
Tissue Development	adhesion of neutrophils	3.53e-10		1.393	bias	CSF3R	INPP5D	ITGAM	ITGAX	ITGB2	LCP1	LYN	PIK3CG	SELPLG	9
Cell Death and Survival	cell death of blood cells	3.82e-10		-0.595		BCL2A1	C1QA	CCL3L1/CCL3L3	CD9	CHI3L1	CSF1R	CTSD	FCER1G	FCGR2B	IGF1	INPP5D	IRF8	ITGAM	ITGB2	KLK6	LAG3	LYN	NAIP	PIK3CG	RUNX1	SPI1	STAT3	TYROBP	23
Hematological System Development and Function	differentiation of granulocytes	4.62e-10		0.564	bias	C1QC	CSF3R	IGF1	INPP5D	IRF8	LYN	MAFB	RUNX1	SPI1	STAT3	10
Cellular Development	differentiation of granulocytes	4.62e-10		0.564	bias	C1QC	CSF3R	IGF1	INPP5D	IRF8	LYN	MAFB	RUNX1	SPI1	STAT3	10
Hematopoiesis	differentiation of granulocytes	4.62e-10		0.564	bias	C1QC	CSF3R	IGF1	INPP5D	IRF8	LYN	MAFB	RUNX1	SPI1	STAT3	10
Cardiovascular Disease	vascular disease	5.08e-10		0.929		B2M	C1QA	C3AR1	CCL3L1/CCL3L3	CD53	CHI3L1	CTSD	CTSS	FCGR2A	FCGR2B	IGF1	IGFBP5	IRF8	ITGAM	ITGAX	ITGB2	LAPTM5	LCP1	LYN	MAFB	PIK3CG	RASGRP3	RUNX1	SAMSN1	SLCO2B1	STAT3	TLR7	27
Hematological System Development and Function	differentiation of leukocytes	5.64e-10	Increased	3.145	bias	B2M	BCL2A1	C1QC	C3AR1	CSF1R	CSF3R	FCGR2B	IGF1	INPP5D	IRF8	ITGAM	ITGB2	LCP2	LYN	MAFB	NCKAP1L	PIK3CG	RUNX1	SPI1	STAT3	TLR7	TYROBP	22
Cellular Development	differentiation of leukocytes	5.64e-10	Increased	3.145	bias	B2M	BCL2A1	C1QC	C3AR1	CSF1R	CSF3R	FCGR2B	IGF1	INPP5D	IRF8	ITGAM	ITGB2	LCP2	LYN	MAFB	NCKAP1L	PIK3CG	RUNX1	SPI1	STAT3	TLR7	TYROBP	22
Hematopoiesis	differentiation of leukocytes	5.64e-10	Increased	3.145	bias	B2M	BCL2A1	C1QC	C3AR1	CSF1R	CSF3R	FCGR2B	IGF1	INPP5D	IRF8	ITGAM	ITGB2	LCP2	LYN	MAFB	NCKAP1L	PIK3CG	RUNX1	SPI1	STAT3	TLR7	TYROBP	22
Inflammatory Response	proliferation of phagocytes	5.68e-10		0.022		CSF1R	FCGR2B	INPP5D	IRF8	LAG3	LYN	RUNX1	SPI1	STAT3	TYROBP	10
Hematological System Development and Function	proliferation of phagocytes	5.68e-10		0.022		CSF1R	FCGR2B	INPP5D	IRF8	LAG3	LYN	RUNX1	SPI1	STAT3	TYROBP	10
Cellular Development	proliferation of phagocytes	5.68e-10		0.022		CSF1R	FCGR2B	INPP5D	IRF8	LAG3	LYN	RUNX1	SPI1	STAT3	TYROBP	10
Cellular Growth and Proliferation	proliferation of phagocytes	5.68e-10		0.022		CSF1R	FCGR2B	INPP5D	IRF8	LAG3	LYN	RUNX1	SPI1	STAT3	TYROBP	10
Inflammatory Response	degranulation of mast cells	5.71e-10		0.579	bias	C3AR1	CCL3L1/CCL3L3	CD9	FCER1G	FCGR2A	FCGR2B	Gp49a/Lilrb4	INPP5D	LCP2	LYN	PIK3CG	11
Cellular Compromise	degranulation of mast cells	5.71e-10		0.579	bias	C3AR1	CCL3L1/CCL3L3	CD9	FCER1G	FCGR2A	FCGR2B	Gp49a/Lilrb4	INPP5D	LCP2	LYN	PIK3CG	11
Hypersensitivity Response	degranulation of mast cells	5.71e-10		0.579	bias	C3AR1	CCL3L1/CCL3L3	CD9	FCER1G	FCGR2A	FCGR2B	Gp49a/Lilrb4	INPP5D	LCP2	LYN	PIK3CG	11
Cellular Development	maturation of phagocytes	5.71e-10		0.903	bias	CLEC7A	FCGR2B	INPP5D	IRF8	ITGAM	ITGB2	LYN	STAT3	TLR7	TREM2	TYROBP	11
Hematopoiesis	maturation of phagocytes	5.71e-10		0.903	bias	CLEC7A	FCGR2B	INPP5D	IRF8	ITGAM	ITGB2	LYN	STAT3	TLR7	TREM2	TYROBP	11
Cell-To-Cell Signaling and Interaction	activation of myeloid cells	5.79e-10	Increased	2.291	bias	CHI3L1	CLEC5A	CSF1R	FCER1G	FCGR2A	FCGR2B	GRN	IGF1	ITGAM	ITGB2	SLC11A1	STAT3	TREM2	TYROBP	14
Inflammatory Response	activation of myeloid cells	5.79e-10	Increased	2.291	bias	CHI3L1	CLEC5A	CSF1R	FCER1G	FCGR2A	FCGR2B	GRN	IGF1	ITGAM	ITGB2	SLC11A1	STAT3	TREM2	TYROBP	14
Hematological System Development and Function	activation of myeloid cells	5.79e-10	Increased	2.291	bias	CHI3L1	CLEC5A	CSF1R	FCER1G	FCGR2A	FCGR2B	GRN	IGF1	ITGAM	ITGB2	SLC11A1	STAT3	TREM2	TYROBP	14
Immune Cell Trafficking	activation of myeloid cells	5.79e-10	Increased	2.291	bias	CHI3L1	CLEC5A	CSF1R	FCER1G	FCGR2A	FCGR2B	GRN	IGF1	ITGAM	ITGB2	SLC11A1	STAT3	TREM2	TYROBP	14
Cell Signaling	mobilization of Ca2+	7.96e-10		1.337	bias	B2M	C3AR1	CCL3L1/CCL3L3	CD180	CD84	CMKLR1	FCER1G	FCGR2A	FCGR2B	Gp49a/Lilrb4	INPP5D	ITGB2	LCP2	LYN	PIK3CG	S1PR3	16
Molecular Transport	mobilization of Ca2+	7.96e-10		1.337	bias	B2M	C3AR1	CCL3L1/CCL3L3	CD180	CD84	CMKLR1	FCER1G	FCGR2A	FCGR2B	Gp49a/Lilrb4	INPP5D	ITGB2	LCP2	LYN	PIK3CG	S1PR3	16
Vitamin and Mineral Metabolism	mobilization of Ca2+	7.96e-10		1.337	bias	B2M	C3AR1	CCL3L1/CCL3L3	CD180	CD84	CMKLR1	FCER1G	FCGR2A	FCGR2B	Gp49a/Lilrb4	INPP5D	ITGB2	LCP2	LYN	PIK3CG	S1PR3	16
Tissue Development	accumulation of cells	8.29e-10		1.416		B2M	BCL2A1	CCL3L1/CCL3L3	FCGR2A	GRN	IGF1	INPP5D	ITGAM	ITGAX	ITGB2	PIK3CG	RUNX1	SELPLG	STAT3	TLR7	TYROBP	16
Connective Tissue Disorders	Rheumatic Disease	8.65e-10		1.161		B2M	C1QA	C1QB	C3AR1	CCL3L1/CCL3L3	CD180	CD68	CHI3L1	CLEC5A	CSF3R	CTSS	FCER1G	FCGR2A	FCGR2B	GFAP	GRN	HLA-B	IGF1	IGFBP5	IRF8	ITGAM	ITGB2	LCP1	LYN	PIK3CG	STAT3	TLR7	TYROBP	28
Inflammatory Disease	Rheumatic Disease	8.65e-10		1.161		B2M	C1QA	C1QB	C3AR1	CCL3L1/CCL3L3	CD180	CD68	CHI3L1	CLEC5A	CSF3R	CTSS	FCER1G	FCGR2A	FCGR2B	GFAP	GRN	HLA-B	IGF1	IGFBP5	IRF8	ITGAM	ITGB2	LCP1	LYN	PIK3CG	STAT3	TLR7	TYROBP	28
Skeletal and Muscular Disorders	Rheumatic Disease	8.65e-10		1.161		B2M	C1QA	C1QB	C3AR1	CCL3L1/CCL3L3	CD180	CD68	CHI3L1	CLEC5A	CSF3R	CTSS	FCER1G	FCGR2A	FCGR2B	GFAP	GRN	HLA-B	IGF1	IGFBP5	IRF8	ITGAM	ITGB2	LCP1	LYN	PIK3CG	STAT3	TLR7	TYROBP	28
Cell Death and Survival	cell death of immune cells	9.91e-10		-0.785		BCL2A1	C1QA	CD9	CHI3L1	CSF1R	CTSD	FCER1G	FCGR2B	IGF1	INPP5D	IRF8	ITGAM	ITGB2	KLK6	LAG3	LYN	NAIP	PIK3CG	RUNX1	SPI1	STAT3	TYROBP	22
Inflammatory Response	accumulation of leukocytes	1.06e-09		1.439	bias	B2M	BCL2A1	CCL3L1/CCL3L3	FCGR2A	GRN	INPP5D	ITGAM	ITGAX	ITGB2	PIK3CG	SELPLG	STAT3	TLR7	TYROBP	14
Hematological System Development and Function	accumulation of leukocytes	1.06e-09		1.439	bias	B2M	BCL2A1	CCL3L1/CCL3L3	FCGR2A	GRN	INPP5D	ITGAM	ITGAX	ITGB2	PIK3CG	SELPLG	STAT3	TLR7	TYROBP	14
Immune Cell Trafficking	accumulation of leukocytes	1.06e-09		1.439	bias	B2M	BCL2A1	CCL3L1/CCL3L3	FCGR2A	GRN	INPP5D	ITGAM	ITGAX	ITGB2	PIK3CG	SELPLG	STAT3	TLR7	TYROBP	14
Tissue Development	accumulation of leukocytes	1.06e-09		1.439	bias	B2M	BCL2A1	CCL3L1/CCL3L3	FCGR2A	GRN	INPP5D	ITGAM	ITGAX	ITGB2	PIK3CG	SELPLG	STAT3	TLR7	TYROBP	14
Hematological System Development and Function	proliferation of antigen presenting cells	1.12e-09		-0.616	bias	CSF1R	IGF1	IRF8	LAG3	LYN	RUNX1	SPI1	STAT3	TYROBP	9
Cellular Development	proliferation of antigen presenting cells	1.12e-09		-0.616	bias	CSF1R	IGF1	IRF8	LAG3	LYN	RUNX1	SPI1	STAT3	TYROBP	9
Cellular Growth and Proliferation	proliferation of antigen presenting cells	1.12e-09		-0.616	bias	CSF1R	IGF1	IRF8	LAG3	LYN	RUNX1	SPI1	STAT3	TYROBP	9
Cell-To-Cell Signaling and Interaction	recruitment of cells	1.19e-09	Increased	3.226	bias	C3AR1	CCL3L1/CCL3L3	CHI3L1	CLEC7A	CMKLR1	CSF1R	FCGR2A	FCGR2B	INPP5D	ITGAM	ITGB2	LYN	PIK3CG	SELPLG	SLC11A1	TLR7	16
Cellular Movement	recruitment of cells	1.19e-09	Increased	3.226	bias	C3AR1	CCL3L1/CCL3L3	CHI3L1	CLEC7A	CMKLR1	CSF1R	FCGR2A	FCGR2B	INPP5D	ITGAM	ITGB2	LYN	PIK3CG	SELPLG	SLC11A1	TLR7	16
Hematological System Development and Function	T cell homeostasis	1.35e-09	Increased	2.488	bias	B2M	BCL2A1	C3AR1	FCER1G	FCGR2A	FCGR2B	IGF1	IRF8	ITGB2	LAG3	LCP2	NCKAP1L	PIK3CG	RASGRP3	RUNX1	SPI1	STAT3	TLR7	TYROBP	19
Cellular Function and Maintenance	T cell homeostasis	1.35e-09	Increased	2.488	bias	B2M	BCL2A1	C3AR1	FCER1G	FCGR2A	FCGR2B	IGF1	IRF8	ITGB2	LAG3	LCP2	NCKAP1L	PIK3CG	RASGRP3	RUNX1	SPI1	STAT3	TLR7	TYROBP	19
Cell-mediated Immune Response	T cell homeostasis	1.35e-09	Increased	2.488	bias	B2M	BCL2A1	C3AR1	FCER1G	FCGR2A	FCGR2B	IGF1	IRF8	ITGB2	LAG3	LCP2	NCKAP1L	PIK3CG	RASGRP3	RUNX1	SPI1	STAT3	TLR7	TYROBP	19
Hematological System Development and Function	quantity of B lymphocytes	1.44e-09		-0.11	bias	BCL2A1	CD180	CD84	FCER1G	FCGR2A	FCGR2B	Gp49a/Lilrb4	INPP5D	IRF8	ITGB2	LYN	RASGRP3	S1PR3	SAMSN1	SPI1	TYROBP	16
Tissue Morphology	quantity of B lymphocytes	1.44e-09		-0.11	bias	BCL2A1	CD180	CD84	FCER1G	FCGR2A	FCGR2B	Gp49a/Lilrb4	INPP5D	IRF8	ITGB2	LYN	RASGRP3	S1PR3	SAMSN1	SPI1	TYROBP	16
Humoral Immune Response	quantity of B lymphocytes	1.44e-09		-0.11	bias	BCL2A1	CD180	CD84	FCER1G	FCGR2A	FCGR2B	Gp49a/Lilrb4	INPP5D	IRF8	ITGB2	LYN	RASGRP3	S1PR3	SAMSN1	SPI1	TYROBP	16
Immunological Disease	passive systemic anaphylaxis	1.51e-09		1.165	bias	FCER1G	FCGR2A	LYN	PIK3CG	4
Cell-To-Cell Signaling and Interaction	recruitment of leukocytes	2.08e-09	Increased	3.072	bias	C3AR1	CCL3L1/CCL3L3	CHI3L1	CLEC7A	CMKLR1	CSF1R	FCGR2A	FCGR2B	INPP5D	ITGAM	ITGB2	LYN	PIK3CG	SELPLG	TLR7	15
Hematological System Development and Function	recruitment of leukocytes	2.08e-09	Increased	3.072	bias	C3AR1	CCL3L1/CCL3L3	CHI3L1	CLEC7A	CMKLR1	CSF1R	FCGR2A	FCGR2B	INPP5D	ITGAM	ITGB2	LYN	PIK3CG	SELPLG	TLR7	15
Cellular Movement	recruitment of leukocytes	2.08e-09	Increased	3.072	bias	C3AR1	CCL3L1/CCL3L3	CHI3L1	CLEC7A	CMKLR1	CSF1R	FCGR2A	FCGR2B	INPP5D	ITGAM	ITGB2	LYN	PIK3CG	SELPLG	TLR7	15
Immune Cell Trafficking	recruitment of leukocytes	2.08e-09	Increased	3.072	bias	C3AR1	CCL3L1/CCL3L3	CHI3L1	CLEC7A	CMKLR1	CSF1R	FCGR2A	FCGR2B	INPP5D	ITGAM	ITGB2	LYN	PIK3CG	SELPLG	TLR7	15
Cellular Growth and Proliferation	proliferation of lymphatic system cells	2.25e-09		0.709	bias	CD180	CHI3L1	CMKLR1	CSF1R	FCGR2B	IGF1	INPP5D	IRF8	MAFB	RUNX1	SPI1	STAT3	TLR7	13
Lymphoid Tissue Structure and Development	proliferation of lymphatic system cells	2.25e-09		0.709	bias	CD180	CHI3L1	CMKLR1	CSF1R	FCGR2B	IGF1	INPP5D	IRF8	MAFB	RUNX1	SPI1	STAT3	TLR7	13
Hematological System Development and Function	morphology of myeloid cells	2.29e-09				CHI3L1	CMKLR1	CSF3R	CTSD	FCGR2B	HEXB	ITGAM	ITGB2	MAN2B1	PIK3CG	SPI1	11
Cell Morphology	morphology of myeloid cells	2.29e-09				CHI3L1	CMKLR1	CSF3R	CTSD	FCGR2B	HEXB	ITGAM	ITGB2	MAN2B1	PIK3CG	SPI1	11
Hematological System Development and Function	differentiation of blood cells	2.38e-09	Increased	3.029	bias	B2M	BCL2A1	C1QC	C3AR1	CSF1R	CSF3R	FCGR2B	IGF1	INPP5D	IRF8	ITGAM	ITGB2	LCP2	LYN	MAFB	MYO1E	NCKAP1L	PIK3CG	RUNX1	SPI1	STAT3	TLR7	TYROBP	23
Cellular Development	differentiation of blood cells	2.38e-09	Increased	3.029	bias	B2M	BCL2A1	C1QC	C3AR1	CSF1R	CSF3R	FCGR2B	IGF1	INPP5D	IRF8	ITGAM	ITGB2	LCP2	LYN	MAFB	MYO1E	NCKAP1L	PIK3CG	RUNX1	SPI1	STAT3	TLR7	TYROBP	23
Inflammatory Response	Encephalitis	2.63e-09		-0.146		B2M	C10orf54	C3AR1	FCER1G	FCGR2A	GFAP	HLA-B	IGF1	ITGAX	LCP2	LYN	SPI1	TYROBP	UNC93B1	14
Inflammatory Disease	Encephalitis	2.63e-09		-0.146		B2M	C10orf54	C3AR1	FCER1G	FCGR2A	GFAP	HLA-B	IGF1	ITGAX	LCP2	LYN	SPI1	TYROBP	UNC93B1	14
Neurological Disease	Encephalitis	2.63e-09		-0.146		B2M	C10orf54	C3AR1	FCER1G	FCGR2A	GFAP	HLA-B	IGF1	ITGAX	LCP2	LYN	SPI1	TYROBP	UNC93B1	14
Infectious Disease	infection of mammalia	2.95e-09		-1.517	bias	B2M	BCL2A1	C1QA	CCL3L1/CCL3L3	CLEC7A	FCER1G	FCGR2B	GRN	IRF8	ITGAM	ITGAX	ITGB2	LCP1	SLC11A1	TLR7	UNC93B1	16
Hematological System Development and Function	quantity of hematopoietic progenitor cells	2.98e-09		1.953	bias	B2M	CD180	CD9	CSF3R	CTSD	FCER1G	FCGR2B	IGF1	INPP5D	IRF8	ITGB2	LAG3	LCP2	LYN	PIK3CG	RUNX1	SPI1	STAT3	18
Tissue Morphology	quantity of hematopoietic progenitor cells	2.98e-09		1.953	bias	B2M	CD180	CD9	CSF3R	CTSD	FCER1G	FCGR2B	IGF1	INPP5D	IRF8	ITGB2	LAG3	LCP2	LYN	PIK3CG	RUNX1	SPI1	STAT3	18
Hematopoiesis	quantity of hematopoietic progenitor cells	2.98e-09		1.953	bias	B2M	CD180	CD9	CSF3R	CTSD	FCER1G	FCGR2B	IGF1	INPP5D	IRF8	ITGB2	LAG3	LCP2	LYN	PIK3CG	RUNX1	SPI1	STAT3	18
Connective Tissue Disorders	arthritis	3.13e-09		1.4		B2M	C1QA	C3AR1	CCL3L1/CCL3L3	CD180	CD68	CHI3L1	CLEC5A	CSF3R	CTSS	FCER1G	FCGR2A	FCGR2B	GFAP	GRN	HLA-B	IGF1	IGFBP5	ITGAM	ITGB2	LCP1	LYN	PIK3CG	STAT3	TLR7	TYROBP	26
Inflammatory Disease	arthritis	3.13e-09		1.4		B2M	C1QA	C3AR1	CCL3L1/CCL3L3	CD180	CD68	CHI3L1	CLEC5A	CSF3R	CTSS	FCER1G	FCGR2A	FCGR2B	GFAP	GRN	HLA-B	IGF1	IGFBP5	ITGAM	ITGB2	LCP1	LYN	PIK3CG	STAT3	TLR7	TYROBP	26
Skeletal and Muscular Disorders	arthritis	3.13e-09		1.4		B2M	C1QA	C3AR1	CCL3L1/CCL3L3	CD180	CD68	CHI3L1	CLEC5A	CSF3R	CTSS	FCER1G	FCGR2A	FCGR2B	GFAP	GRN	HLA-B	IGF1	IGFBP5	ITGAM	ITGB2	LCP1	LYN	PIK3CG	STAT3	TLR7	TYROBP	26
Lymphoid Tissue Structure and Development	morphology of lymphoid organ	3.51e-09				CSF1R	CTSD	FCGR2B	HPGDS	IGF1	INPP5D	IRF8	ITGB2	LAG3	LCP2	LYN	MAN2B1	PIK3CG	RUNX1	S1PR3	SPI1	STAT3	17
Organ Morphology	morphology of lymphoid organ	3.51e-09				CSF1R	CTSD	FCGR2B	HPGDS	IGF1	INPP5D	IRF8	ITGB2	LAG3	LCP2	LYN	MAN2B1	PIK3CG	RUNX1	S1PR3	SPI1	STAT3	17
Cellular Development	maturation of leukocytes	3.57e-09		1.075	bias	CLEC7A	FCGR2B	INPP5D	IRF8	ITGAM	ITGB2	LCP1	LYN	RUNX1	STAT3	TLR7	TREM2	TYROBP	13
Hematopoiesis	maturation of leukocytes	3.57e-09		1.075	bias	CLEC7A	FCGR2B	INPP5D	IRF8	ITGAM	ITGB2	LCP1	LYN	RUNX1	STAT3	TLR7	TREM2	TYROBP	13
Cell-To-Cell Signaling and Interaction	response of mononuclear leukocytes	3.75e-09		1.236	bias	C3AR1	CD180	CLEC5A	CLEC7A	CTSS	FCGR2A	FCGR2B	LAG3	LCP2	LYN	SELPLG	STAT3	TLR7	13
Cell-To-Cell Signaling and Interaction	phagocytosis of myeloid cells	4.2e-09	Increased	2.426	bias	FCER1G	FCGR2A	FCGR2B	INPP5D	IRF8	ITGAM	ITGB2	SELPLG	SPI1	TREM2	10
Inflammatory Response	phagocytosis of myeloid cells	4.2e-09	Increased	2.426	bias	FCER1G	FCGR2A	FCGR2B	INPP5D	IRF8	ITGAM	ITGB2	SELPLG	SPI1	TREM2	10
Hematological System Development and Function	phagocytosis of myeloid cells	4.2e-09	Increased	2.426	bias	FCER1G	FCGR2A	FCGR2B	INPP5D	IRF8	ITGAM	ITGB2	SELPLG	SPI1	TREM2	10
Cellular Function and Maintenance	phagocytosis of myeloid cells	4.2e-09	Increased	2.426	bias	FCER1G	FCGR2A	FCGR2B	INPP5D	IRF8	ITGAM	ITGB2	SELPLG	SPI1	TREM2	10
Cell Signaling	tyrosine phosphorylation of protein	4.47e-09	Increased	2.257	bias	CD9	CSF1R	FCER1G	FCGR2A	FCGR2B	IGF1	ITGAM	ITGB2	LYN	SAMSN1	SPI1	TYROBP	12
Post-Translational Modification	tyrosine phosphorylation of protein	4.47e-09	Increased	2.257	bias	CD9	CSF1R	FCER1G	FCGR2A	FCGR2B	IGF1	ITGAM	ITGB2	LYN	SAMSN1	SPI1	TYROBP	12
Immunological Disease	abnormality of immune system	4.57e-09				B2M	C3AR1	CCL3L1/CCL3L3	FCER1G	Ggta1	Gp49a/Lilrb4	HEXB	INPP5D	LYN	S1PR3	TREM2	11
Hematological System Development and Function	proliferation of B lymphocytes	4.9e-09		-0.242		BCL2A1	CD180	FCGR2B	Gp49a/Lilrb4	INPP5D	IRF8	LAG3	LY86	LYN	NCKAP1L	SAMSN1	SPI1	TLR7	TYROBP	14
Cellular Development	proliferation of B lymphocytes	4.9e-09		-0.242		BCL2A1	CD180	FCGR2B	Gp49a/Lilrb4	INPP5D	IRF8	LAG3	LY86	LYN	NCKAP1L	SAMSN1	SPI1	TLR7	TYROBP	14
Cellular Growth and Proliferation	proliferation of B lymphocytes	4.9e-09		-0.242		BCL2A1	CD180	FCGR2B	Gp49a/Lilrb4	INPP5D	IRF8	LAG3	LY86	LYN	NCKAP1L	SAMSN1	SPI1	TLR7	TYROBP	14
Humoral Immune Response	proliferation of B lymphocytes	4.9e-09		-0.242		BCL2A1	CD180	FCGR2B	Gp49a/Lilrb4	INPP5D	IRF8	LAG3	LY86	LYN	NCKAP1L	SAMSN1	SPI1	TLR7	TYROBP	14
Inflammatory Response	accumulation of myeloid cells	5.57e-09	Increased	2.073	bias	BCL2A1	FCGR2A	GRN	INPP5D	ITGAM	ITGAX	ITGB2	PIK3CG	SELPLG	STAT3	TLR7	11
Hematological System Development and Function	accumulation of myeloid cells	5.57e-09	Increased	2.073	bias	BCL2A1	FCGR2A	GRN	INPP5D	ITGAM	ITGAX	ITGB2	PIK3CG	SELPLG	STAT3	TLR7	11
Immune Cell Trafficking	accumulation of myeloid cells	5.57e-09	Increased	2.073	bias	BCL2A1	FCGR2A	GRN	INPP5D	ITGAM	ITGAX	ITGB2	PIK3CG	SELPLG	STAT3	TLR7	11
Tissue Development	accumulation of myeloid cells	5.57e-09	Increased	2.073	bias	BCL2A1	FCGR2A	GRN	INPP5D	ITGAM	ITGAX	ITGB2	PIK3CG	SELPLG	STAT3	TLR7	11
Cell-To-Cell Signaling and Interaction	binding of cells	5.92e-09	Increased	3.008	bias	CCL3L1/CCL3L3	CD68	CD84	CD9	CLEC7A	FCGR2A	FCGR2B	IGF1	IGFBP5	IRF8	ITGAM	ITGAX	ITGB2	ITGB5	LCP2	LYN	MSN	SELPLG	18
Hematological System Development and Function	T cell development	6.09e-09	Increased	2.326	bias	B2M	BCL2A1	C3AR1	FCER1G	FCGR2A	FCGR2B	IGF1	IRF8	ITGB2	LCP2	NCKAP1L	PIK3CG	RASGRP3	RUNX1	SPI1	STAT3	TLR7	TYROBP	18
Cellular Function and Maintenance	T cell development	6.09e-09	Increased	2.326	bias	B2M	BCL2A1	C3AR1	FCER1G	FCGR2A	FCGR2B	IGF1	IRF8	ITGB2	LCP2	NCKAP1L	PIK3CG	RASGRP3	RUNX1	SPI1	STAT3	TLR7	TYROBP	18
Cellular Development	T cell development	6.09e-09	Increased	2.326	bias	B2M	BCL2A1	C3AR1	FCER1G	FCGR2A	FCGR2B	IGF1	IRF8	ITGB2	LCP2	NCKAP1L	PIK3CG	RASGRP3	RUNX1	SPI1	STAT3	TLR7	TYROBP	18
Hematopoiesis	T cell development	6.09e-09	Increased	2.326	bias	B2M	BCL2A1	C3AR1	FCER1G	FCGR2A	FCGR2B	IGF1	IRF8	ITGB2	LCP2	NCKAP1L	PIK3CG	RASGRP3	RUNX1	SPI1	STAT3	TLR7	TYROBP	18
Lymphoid Tissue Structure and Development	T cell development	6.09e-09	Increased	2.326	bias	B2M	BCL2A1	C3AR1	FCER1G	FCGR2A	FCGR2B	IGF1	IRF8	ITGB2	LCP2	NCKAP1L	PIK3CG	RASGRP3	RUNX1	SPI1	STAT3	TLR7	TYROBP	18
Cell-mediated Immune Response	T cell development	6.09e-09	Increased	2.326	bias	B2M	BCL2A1	C3AR1	FCER1G	FCGR2A	FCGR2B	IGF1	IRF8	ITGB2	LCP2	NCKAP1L	PIK3CG	RASGRP3	RUNX1	SPI1	STAT3	TLR7	TYROBP	18
Cell-To-Cell Signaling and Interaction	activation of T lymphocytes	6.32e-09		0.743	bias	B2M	C3AR1	CLEC7A	FCER1G	IRF8	ITGAM	ITGB2	LAG3	LAPTM5	PIK3CG	RUNX1	SLC11A1	STAT3	TLR7	TYROBP	15
Inflammatory Response	activation of T lymphocytes	6.32e-09		0.743	bias	B2M	C3AR1	CLEC7A	FCER1G	IRF8	ITGAM	ITGB2	LAG3	LAPTM5	PIK3CG	RUNX1	SLC11A1	STAT3	TLR7	TYROBP	15
Hematological System Development and Function	activation of T lymphocytes	6.32e-09		0.743	bias	B2M	C3AR1	CLEC7A	FCER1G	IRF8	ITGAM	ITGB2	LAG3	LAPTM5	PIK3CG	RUNX1	SLC11A1	STAT3	TLR7	TYROBP	15
Immune Cell Trafficking	activation of T lymphocytes	6.32e-09		0.743	bias	B2M	C3AR1	CLEC7A	FCER1G	IRF8	ITGAM	ITGB2	LAG3	LAPTM5	PIK3CG	RUNX1	SLC11A1	STAT3	TLR7	TYROBP	15
Cellular Development	maturation of bone marrow-derived dendritic cells	6.75e-09		0.734		CLEC7A	FCGR2B	ITGAM	ITGB2	LYN	TLR7	6
Hematopoiesis	maturation of bone marrow-derived dendritic cells	6.75e-09		0.734		CLEC7A	FCGR2B	ITGAM	ITGB2	LYN	TLR7	6
Cell-To-Cell Signaling and Interaction	immune response of macrophages	7.3e-09	Increased	2.096	bias	FCER1G	FCGR2A	FCGR2B	INPP5D	IRF8	ITGAM	ITGB2	LYN	SPI1	TREM2	10
Inflammatory Response	immune response of macrophages	7.3e-09	Increased	2.096	bias	FCER1G	FCGR2A	FCGR2B	INPP5D	IRF8	ITGAM	ITGB2	LYN	SPI1	TREM2	10
Cell Death and Survival	apoptosis of blood cells	7.89e-09		-1.606		BCL2A1	C1QA	CCL3L1/CCL3L3	CD9	CHI3L1	CTSD	FCER1G	FCGR2B	IGF1	INPP5D	IRF8	ITGAM	ITGB2	LYN	PIK3CG	RUNX1	SPI1	STAT3	18
Hematological System Development and Function	quantity of thymocytes	8.53e-09	Increased	2.06	bias	B2M	CTSD	FCER1G	FCGR2B	IGF1	INPP5D	ITGB2	LAG3	LCP2	PIK3CG	RUNX1	SPI1	STAT3	13
Tissue Morphology	quantity of thymocytes	8.53e-09	Increased	2.06	bias	B2M	CTSD	FCER1G	FCGR2B	IGF1	INPP5D	ITGB2	LAG3	LCP2	PIK3CG	RUNX1	SPI1	STAT3	13
Hematopoiesis	quantity of thymocytes	8.53e-09	Increased	2.06	bias	B2M	CTSD	FCER1G	FCGR2B	IGF1	INPP5D	ITGB2	LAG3	LCP2	PIK3CG	RUNX1	SPI1	STAT3	13
Inflammatory Response	accumulation of phagocytes	9.15e-09		1.289	bias	FCGR2A	GRN	INPP5D	ITGAM	ITGAX	ITGB2	SELPLG	STAT3	TLR7	TYROBP	10
Hematological System Development and Function	accumulation of phagocytes	9.15e-09		1.289	bias	FCGR2A	GRN	INPP5D	ITGAM	ITGAX	ITGB2	SELPLG	STAT3	TLR7	TYROBP	10
Immune Cell Trafficking	accumulation of phagocytes	9.15e-09		1.289	bias	FCGR2A	GRN	INPP5D	ITGAM	ITGAX	ITGB2	SELPLG	STAT3	TLR7	TYROBP	10
Tissue Development	accumulation of phagocytes	9.15e-09		1.289	bias	FCGR2A	GRN	INPP5D	ITGAM	ITGAX	ITGB2	SELPLG	STAT3	TLR7	TYROBP	10
Hematological System Development and Function	proliferation of myeloid cells	9.2e-09		-1.246		CSF1R	CSF3R	IGF1	IRF8	LAG3	MAFB	RUNX1	SPI1	STAT3	9
Cellular Development	proliferation of myeloid cells	9.2e-09		-1.246		CSF1R	CSF3R	IGF1	IRF8	LAG3	MAFB	RUNX1	SPI1	STAT3	9
Cellular Growth and Proliferation	proliferation of myeloid cells	9.2e-09		-1.246		CSF1R	CSF3R	IGF1	IRF8	LAG3	MAFB	RUNX1	SPI1	STAT3	9
Cellular Function and Maintenance	cellular homeostasis	1.09e-08	Increased	2.004	bias	B2M	BCL2A1	C3AR1	CCL3L1/CCL3L3	CLEC7A	CTSD	FCER1G	FCGR2A	FCGR2B	HEXB	IGF1	IGFBP5	INPP5D	IRF8	ITGB2	LAG3	LCP2	LYN	NCKAP1L	PIK3CG	RASGRP3	RUNX1	S1PR3	SLC11A1	SLC14A1	SPI1	STAT3	TBXAS1	TF	TLR7	TYROBP	31
Inflammatory Response	accumulation of granulocytes	1.11e-08	Increased	2.157	bias	BCL2A1	FCGR2A	GRN	INPP5D	ITGAM	ITGB2	PIK3CG	SELPLG	STAT3	9
Hematological System Development and Function	accumulation of granulocytes	1.11e-08	Increased	2.157	bias	BCL2A1	FCGR2A	GRN	INPP5D	ITGAM	ITGB2	PIK3CG	SELPLG	STAT3	9
Immune Cell Trafficking	accumulation of granulocytes	1.11e-08	Increased	2.157	bias	BCL2A1	FCGR2A	GRN	INPP5D	ITGAM	ITGB2	PIK3CG	SELPLG	STAT3	9
Tissue Development	accumulation of granulocytes	1.11e-08	Increased	2.157	bias	BCL2A1	FCGR2A	GRN	INPP5D	ITGAM	ITGB2	PIK3CG	SELPLG	STAT3	9
Cell-To-Cell Signaling and Interaction	respiratory burst of phagocytes	1.22e-08		-0.351	bias	FCER1G	IRF8	ITGAM	ITGB2	LYN	PIK3CG	TYROBP	7
Inflammatory Response	respiratory burst of phagocytes	1.22e-08		-0.351	bias	FCER1G	IRF8	ITGAM	ITGB2	LYN	PIK3CG	TYROBP	7
Cellular Function and Maintenance	respiratory burst of phagocytes	1.22e-08		-0.351	bias	FCER1G	IRF8	ITGAM	ITGB2	LYN	PIK3CG	TYROBP	7
Cellular Compromise	respiratory burst of phagocytes	1.22e-08		-0.351	bias	FCER1G	IRF8	ITGAM	ITGB2	LYN	PIK3CG	TYROBP	7
Hematological System Development and Function	differentiation of myeloid cells	1.23e-08		1.422	bias	C1QC	CSF1R	CSF3R	IGF1	INPP5D	IRF8	ITGAM	LYN	MAFB	RUNX1	SPI1	STAT3	TYROBP	13
Cellular Development	differentiation of myeloid cells	1.23e-08		1.422	bias	C1QC	CSF1R	CSF3R	IGF1	INPP5D	IRF8	ITGAM	LYN	MAFB	RUNX1	SPI1	STAT3	TYROBP	13
Hematopoiesis	differentiation of myeloid cells	1.23e-08		1.422	bias	C1QC	CSF1R	CSF3R	IGF1	INPP5D	IRF8	ITGAM	LYN	MAFB	RUNX1	SPI1	STAT3	TYROBP	13
Cellular Compromise	respiratory burst	1.31e-08		-0.034	bias	FCER1G	IRF8	ITGAM	ITGB2	LYN	PIK3CG	SLC11A1	TYROBP	8
Cellular Movement	infiltration of cells	1.38e-08		-0.018		CCL3L1/CCL3L3	CLEC5A	CMKLR1	CSF1R	FCER1G	FCGR2B	GFAP	INPP5D	IRF8	ITGAM	ITGB2	LAG3	LCP2	PIK3CG	SELPLG	STAT3	16
Inflammatory Response	proliferation of macrophages	1.43e-08		0.294		CSF1R	IRF8	LAG3	RUNX1	SPI1	STAT3	TYROBP	7
Hematological System Development and Function	proliferation of macrophages	1.43e-08		0.294		CSF1R	IRF8	LAG3	RUNX1	SPI1	STAT3	TYROBP	7
Cellular Development	proliferation of macrophages	1.43e-08		0.294		CSF1R	IRF8	LAG3	RUNX1	SPI1	STAT3	TYROBP	7
Cellular Growth and Proliferation	proliferation of macrophages	1.43e-08		0.294		CSF1R	IRF8	LAG3	RUNX1	SPI1	STAT3	TYROBP	7
Hematological System Development and Function	aggregation of blood cells	1.45e-08	Increased	2.933	bias	CD9	FCER1G	FCGR2A	IGF1	INPP5D	ITGB2	LCP2	LYN	PIK3CG	PLEK	SELPLG	TBXAS1	12
Tissue Development	aggregation of blood cells	1.45e-08	Increased	2.933	bias	CD9	FCER1G	FCGR2A	IGF1	INPP5D	ITGB2	LCP2	LYN	PIK3CG	PLEK	SELPLG	TBXAS1	12
Cellular Development	proliferation of bone marrow cells	1.63e-08		0.035	bias	CMKLR1	CSF1R	FCGR2B	IGF1	INPP5D	IRF8	MAFB	RUNX1	SPI1	STAT3	10
Cellular Growth and Proliferation	proliferation of bone marrow cells	1.63e-08		0.035	bias	CMKLR1	CSF1R	FCGR2B	IGF1	INPP5D	IRF8	MAFB	RUNX1	SPI1	STAT3	10
Lymphoid Tissue Structure and Development	proliferation of bone marrow cells	1.63e-08		0.035	bias	CMKLR1	CSF1R	FCGR2B	IGF1	INPP5D	IRF8	MAFB	RUNX1	SPI1	STAT3	10
Cell-To-Cell Signaling and Interaction	respiratory burst of myeloid cells	1.67e-08		-0.351	bias	FCER1G	IRF8	ITGAM	ITGB2	LYN	PIK3CG	TYROBP	7
Cellular Function and Maintenance	respiratory burst of myeloid cells	1.67e-08		-0.351	bias	FCER1G	IRF8	ITGAM	ITGB2	LYN	PIK3CG	TYROBP	7
Cellular Compromise	respiratory burst of myeloid cells	1.67e-08		-0.351	bias	FCER1G	IRF8	ITGAM	ITGB2	LYN	PIK3CG	TYROBP	7
Hematological System Development and Function	function of granulocytes	1.72e-08				BCL2A1	C3AR1	CLEC7A	FCGR2A	ITGAM	ITGB2	LCP1	LYN	PIK3CG	9
Cellular Function and Maintenance	function of granulocytes	1.72e-08				BCL2A1	C3AR1	CLEC7A	FCGR2A	ITGAM	ITGB2	LCP1	LYN	PIK3CG	9
Humoral Immune Response	quantity of IgM	1.75e-08		-1.944		B2M	CTSS	FCGR2B	Ggta1	IRF8	ITGB2	LY86	LYN	SAMSN1	SPI1	10
Protein Synthesis	quantity of IgM	1.75e-08		-1.944		B2M	CTSS	FCGR2B	Ggta1	IRF8	ITGB2	LY86	LYN	SAMSN1	SPI1	10
Inflammatory Response	migration of phagocytes	2.57e-08	Increased	3.388	bias	CCL3L1/CCL3L3	CMKLR1	CSF1R	CTSS	CTSZ	ITGAM	ITGAX	ITGB2	PIK3CG	S1PR3	SELPLG	TREM2	TYROBP	13
Hematological System Development and Function	migration of phagocytes	2.57e-08	Increased	3.388	bias	CCL3L1/CCL3L3	CMKLR1	CSF1R	CTSS	CTSZ	ITGAM	ITGAX	ITGB2	PIK3CG	S1PR3	SELPLG	TREM2	TYROBP	13
Cellular Movement	migration of phagocytes	2.57e-08	Increased	3.388	bias	CCL3L1/CCL3L3	CMKLR1	CSF1R	CTSS	CTSZ	ITGAM	ITGAX	ITGB2	PIK3CG	S1PR3	SELPLG	TREM2	TYROBP	13
Immune Cell Trafficking	migration of phagocytes	2.57e-08	Increased	3.388	bias	CCL3L1/CCL3L3	CMKLR1	CSF1R	CTSS	CTSZ	ITGAM	ITGAX	ITGB2	PIK3CG	S1PR3	SELPLG	TREM2	TYROBP	13
Cellular Development	maturation of dendritic cells	2.61e-08		1.902	bias	CLEC7A	FCGR2B	IRF8	ITGAM	ITGB2	LYN	TLR7	TREM2	TYROBP	9
Hematopoiesis	maturation of dendritic cells	2.61e-08		1.902	bias	CLEC7A	FCGR2B	IRF8	ITGAM	ITGB2	LYN	TLR7	TREM2	TYROBP	9
Cellular Development	differentiation of osteoclasts	2.65e-08		0.811		C3AR1	CCL3L1/CCL3L3	CD9	CSF1R	FCER1G	FCGR2B	IGF1	INPP5D	TF	TREM2	TYROBP	11
Tissue Development	differentiation of osteoclasts	2.65e-08		0.811		C3AR1	CCL3L1/CCL3L3	CD9	CSF1R	FCER1G	FCGR2B	IGF1	INPP5D	TF	TREM2	TYROBP	11
Connective Tissue Development and Function	differentiation of osteoclasts	2.65e-08		0.811		C3AR1	CCL3L1/CCL3L3	CD9	CSF1R	FCER1G	FCGR2B	IGF1	INPP5D	TF	TREM2	TYROBP	11
Embryonic Development	differentiation of osteoclasts	2.65e-08		0.811		C3AR1	CCL3L1/CCL3L3	CD9	CSF1R	FCER1G	FCGR2B	IGF1	INPP5D	TF	TREM2	TYROBP	11
Organ Development	differentiation of osteoclasts	2.65e-08		0.811		C3AR1	CCL3L1/CCL3L3	CD9	CSF1R	FCER1G	FCGR2B	IGF1	INPP5D	TF	TREM2	TYROBP	11
Organismal Development	differentiation of osteoclasts	2.65e-08		0.811		C3AR1	CCL3L1/CCL3L3	CD9	CSF1R	FCER1G	FCGR2B	IGF1	INPP5D	TF	TREM2	TYROBP	11
Skeletal and Muscular System Development and Function	differentiation of osteoclasts	2.65e-08		0.811		C3AR1	CCL3L1/CCL3L3	CD9	CSF1R	FCER1G	FCGR2B	IGF1	INPP5D	TF	TREM2	TYROBP	11
Inflammatory Response	quantity of dendritic cells	3.06e-08		1.067	bias	CSF1R	FCGR2B	INPP5D	IRF8	ITGB2	PIK3CG	SPI1	STAT3	TYROBP	9
Hematological System Development and Function	quantity of dendritic cells	3.06e-08		1.067	bias	CSF1R	FCGR2B	INPP5D	IRF8	ITGB2	PIK3CG	SPI1	STAT3	TYROBP	9
Tissue Morphology	quantity of dendritic cells	3.06e-08		1.067	bias	CSF1R	FCGR2B	INPP5D	IRF8	ITGB2	PIK3CG	SPI1	STAT3	TYROBP	9
Immunological Disease	hypersensitive reaction	3.29e-08		1.473	bias	C3AR1	CCL3L1/CCL3L3	FCER1G	FCGR2A	FCGR2B	Gp49a/Lilrb4	HLA-B	ITGB2	KLK6	LAPTM5	LCP2	LYN	MSN	OSMR	PIK3CG	SPI1	16
Cell-To-Cell Signaling and Interaction	response of lymphocytes	3.3e-08		1.178	bias	C3AR1	CD180	CTSS	FCGR2A	FCGR2B	LAG3	LCP2	LYN	SELPLG	STAT3	TLR7	11
Hematological System Development and Function	response of lymphocytes	3.3e-08		1.178	bias	C3AR1	CD180	CTSS	FCGR2A	FCGR2B	LAG3	LCP2	LYN	SELPLG	STAT3	TLR7	11
Inflammatory Response	quantity of macrophages	4.31e-08		1.97		B2M	C3AR1	CSF1R	CTSS	Gp49a/Lilrb4	IRF8	ITGB2	PIK3CG	SELPLG	SPI1	STAT3	11
Hematological System Development and Function	quantity of macrophages	4.31e-08		1.97		B2M	C3AR1	CSF1R	CTSS	Gp49a/Lilrb4	IRF8	ITGB2	PIK3CG	SELPLG	SPI1	STAT3	11
Tissue Morphology	quantity of macrophages	4.31e-08		1.97		B2M	C3AR1	CSF1R	CTSS	Gp49a/Lilrb4	IRF8	ITGB2	PIK3CG	SELPLG	SPI1	STAT3	11
Carbohydrate Metabolism	metabolism of phosphatidylinositol	4.66e-08		1.212	bias	FCGR2A	FCGR2B	IGF1	INPP5D	ITGB2	LYN	PIK3CG	PLEK	8
Lipid Metabolism	metabolism of phosphatidylinositol	4.66e-08		1.212	bias	FCGR2A	FCGR2B	IGF1	INPP5D	ITGB2	LYN	PIK3CG	PLEK	8
Small Molecule Biochemistry	metabolism of phosphatidylinositol	4.66e-08		1.212	bias	FCGR2A	FCGR2B	IGF1	INPP5D	ITGB2	LYN	PIK3CG	PLEK	8
Inflammatory Response	experimental autoimmune encephalomyelitis	4.77e-08		0.426		B2M	C10orf54	C3AR1	FCER1G	FCGR2A	HLA-B	IGF1	ITGAX	LCP2	LYN	SPI1	TYROBP	12
Immunological Disease	experimental autoimmune encephalomyelitis	4.77e-08		0.426		B2M	C10orf54	C3AR1	FCER1G	FCGR2A	HLA-B	IGF1	ITGAX	LCP2	LYN	SPI1	TYROBP	12
Inflammatory Disease	experimental autoimmune encephalomyelitis	4.77e-08		0.426		B2M	C10orf54	C3AR1	FCER1G	FCGR2A	HLA-B	IGF1	ITGAX	LCP2	LYN	SPI1	TYROBP	12
Neurological Disease	experimental autoimmune encephalomyelitis	4.77e-08		0.426		B2M	C10orf54	C3AR1	FCER1G	FCGR2A	HLA-B	IGF1	ITGAX	LCP2	LYN	SPI1	TYROBP	12
Hematological System Development and Function	expansion of leukocytes	4.78e-08		-1.526	bias	B2M	CD180	CSF1R	CTSD	FCGR2B	LAG3	LCP2	LYN	RUNX1	SPI1	STAT3	11
Cellular Development	expansion of leukocytes	4.78e-08		-1.526	bias	B2M	CD180	CSF1R	CTSD	FCGR2B	LAG3	LCP2	LYN	RUNX1	SPI1	STAT3	11
Cellular Growth and Proliferation	expansion of leukocytes	4.78e-08		-1.526	bias	B2M	CD180	CSF1R	CTSD	FCGR2B	LAG3	LCP2	LYN	RUNX1	SPI1	STAT3	11
Hematological System Development and Function	function of neutrophils	5.13e-08				BCL2A1	CLEC7A	FCGR2A	ITGAM	ITGB2	LCP1	LYN	PIK3CG	8
Cellular Function and Maintenance	function of neutrophils	5.13e-08				BCL2A1	CLEC7A	FCGR2A	ITGAM	ITGB2	LCP1	LYN	PIK3CG	8
Immunological Disease	abnormal quantity of cytokine	5.26e-08				B2M	C3AR1	CCL3L1/CCL3L3	Gp49a/Lilrb4	HEXB	INPP5D	LYN	S1PR3	TREM2	9
Cell-To-Cell Signaling and Interaction	respiratory burst of neutrophils	5.31e-08		-1.033	bias	FCER1G	ITGAM	ITGB2	LYN	PIK3CG	TYROBP	6
Inflammatory Response	respiratory burst of neutrophils	5.31e-08		-1.033	bias	FCER1G	ITGAM	ITGB2	LYN	PIK3CG	TYROBP	6
Hematological System Development and Function	respiratory burst of neutrophils	5.31e-08		-1.033	bias	FCER1G	ITGAM	ITGB2	LYN	PIK3CG	TYROBP	6
Cellular Function and Maintenance	respiratory burst of neutrophils	5.31e-08		-1.033	bias	FCER1G	ITGAM	ITGB2	LYN	PIK3CG	TYROBP	6
Cellular Compromise	respiratory burst of neutrophils	5.31e-08		-1.033	bias	FCER1G	ITGAM	ITGB2	LYN	PIK3CG	TYROBP	6
Carbohydrate Metabolism	synthesis of phosphatidylinositol-3	4	5-triphosphate	5.31e-08		0.537	bias	FCGR2A	IGF1	INPP5D	ITGB2	LYN	PIK3CG	6
Lipid Metabolism	synthesis of phosphatidylinositol-3	4	5-triphosphate	5.31e-08		0.537	bias	FCGR2A	IGF1	INPP5D	ITGB2	LYN	PIK3CG	6
Small Molecule Biochemistry	synthesis of phosphatidylinositol-3	4	5-triphosphate	5.31e-08		0.537	bias	FCGR2A	IGF1	INPP5D	ITGB2	LYN	PIK3CG	6
Hematological System Development and Function	production of myeloid cells	5.34e-08				CSF1R	INPP5D	IRF8	RUNX1	SPI1	5
Cellular Function and Maintenance	production of myeloid cells	5.34e-08				CSF1R	INPP5D	IRF8	RUNX1	SPI1	5
Cellular Growth and Proliferation	production of myeloid cells	5.34e-08				CSF1R	INPP5D	IRF8	RUNX1	SPI1	5
Cell Morphology	morphology of neuroglia	6.09e-08				CD9	CTSD	GFAP	HEXA	HEXB	IGF1	MAN2B1	SPI1	TYROBP	9
Nervous System Development and Function	morphology of neuroglia	6.09e-08				CD9	CTSD	GFAP	HEXA	HEXB	IGF1	MAN2B1	SPI1	TYROBP	9
Cell-To-Cell Signaling and Interaction	phagocytosis of phagocytes	6.09e-08	Increased	2.25	bias	FCER1G	FCGR2A	FCGR2B	INPP5D	ITGAM	ITGB2	SELPLG	SPI1	TREM2	9
Inflammatory Response	phagocytosis of phagocytes	6.09e-08	Increased	2.25	bias	FCER1G	FCGR2A	FCGR2B	INPP5D	ITGAM	ITGB2	SELPLG	SPI1	TREM2	9
Cellular Function and Maintenance	phagocytosis of phagocytes	6.09e-08	Increased	2.25	bias	FCER1G	FCGR2A	FCGR2B	INPP5D	ITGAM	ITGB2	SELPLG	SPI1	TREM2	9
Cellular Development	differentiation of cells	6.52e-08	Increased	3.492	bias	B2M	BCL2A1	C10orf54	C1QC	C3AR1	CCL3L1/CCL3L3	CD9	CHI3L1	CMKLR1	CSF1R	CSF3R	FCER1G	FCGR2B	GFAP	GRN	IGF1	IGFBP5	INPP5D	IRF8	ITGAM	ITGB2	ITGB5	LCP2	LYN	MAFB	MYO1E	NCKAP1L	PIK3CG	RUNX1	S1PR3	SPI1	STAT3	TF	TLR7	TREM2	TYROBP	36
Cellular Growth and Proliferation	colony formation of bone marrow cells	8.52e-08		-0.061	bias	CCL3L1/CCL3L3	CSF1R	CSF3R	INPP5D	IRF8	SPI1	STAT3	7
Hematopoiesis	colony formation of bone marrow cells	8.52e-08		-0.061	bias	CCL3L1/CCL3L3	CSF1R	CSF3R	INPP5D	IRF8	SPI1	STAT3	7
Lymphoid Tissue Structure and Development	abnormal morphology of lymphoid organ	9.57e-08				CSF1R	CTSD	FCGR2B	HPGDS	INPP5D	IRF8	ITGB2	LAG3	LCP2	LYN	MAN2B1	PIK3CG	RUNX1	S1PR3	SPI1	15
Organ Morphology	abnormal morphology of lymphoid organ	9.57e-08				CSF1R	CTSD	FCGR2B	HPGDS	INPP5D	IRF8	ITGB2	LAG3	LCP2	LYN	MAN2B1	PIK3CG	RUNX1	S1PR3	SPI1	15
Cell Death and Survival	apoptosis of leukocytes	9.72e-08		-1.823		BCL2A1	C1QA	CD9	CHI3L1	FCER1G	FCGR2B	IGF1	INPP5D	IRF8	ITGAM	ITGB2	LYN	PIK3CG	RUNX1	SPI1	STAT3	16
Tissue Development	abnormal morphology of trabecular bone	9.73e-08				CD68	CSF1R	FCER1G	HEXA	HEXB	IGF1	INPP5D	TYROBP	8
Organ Morphology	abnormal morphology of trabecular bone	9.73e-08				CD68	CSF1R	FCER1G	HEXA	HEXB	IGF1	INPP5D	TYROBP	8
Connective Tissue Development and Function	abnormal morphology of trabecular bone	9.73e-08				CD68	CSF1R	FCER1G	HEXA	HEXB	IGF1	INPP5D	TYROBP	8
Embryonic Development	abnormal morphology of trabecular bone	9.73e-08				CD68	CSF1R	FCER1G	HEXA	HEXB	IGF1	INPP5D	TYROBP	8
Organ Development	abnormal morphology of trabecular bone	9.73e-08				CD68	CSF1R	FCER1G	HEXA	HEXB	IGF1	INPP5D	TYROBP	8
Organismal Development	abnormal morphology of trabecular bone	9.73e-08				CD68	CSF1R	FCER1G	HEXA	HEXB	IGF1	INPP5D	TYROBP	8
Skeletal and Muscular System Development and Function	abnormal morphology of trabecular bone	9.73e-08				CD68	CSF1R	FCER1G	HEXA	HEXB	IGF1	INPP5D	TYROBP	8
Hematological System Development and Function	proliferation of hematopoietic cells	9.91e-08		0.865	bias	CCL3L1/CCL3L3	CSF1R	CSF3R	Gp49a/Lilrb4	IRF8	LCP2	MAFB	PIK3CG	RASGRP3	RUNX1	SPI1	STAT3	12
Cellular Development	proliferation of hematopoietic cells	9.91e-08		0.865	bias	CCL3L1/CCL3L3	CSF1R	CSF3R	Gp49a/Lilrb4	IRF8	LCP2	MAFB	PIK3CG	RASGRP3	RUNX1	SPI1	STAT3	12
Cellular Growth and Proliferation	proliferation of hematopoietic cells	9.91e-08		0.865	bias	CCL3L1/CCL3L3	CSF1R	CSF3R	Gp49a/Lilrb4	IRF8	LCP2	MAFB	PIK3CG	RASGRP3	RUNX1	SPI1	STAT3	12
Hematopoiesis	proliferation of hematopoietic cells	9.91e-08		0.865	bias	CCL3L1/CCL3L3	CSF1R	CSF3R	Gp49a/Lilrb4	IRF8	LCP2	MAFB	PIK3CG	RASGRP3	RUNX1	SPI1	STAT3	12
Cellular Development	maturation of cells	1.02e-07		1.656	bias	CLEC7A	CSF1R	FCGR2B	IGF1	INPP5D	IRF8	ITGAM	ITGB2	LCP1	LYN	RUNX1	STAT3	TLR7	TREM2	TYROBP	15
Cell-To-Cell Signaling and Interaction	phagocytosis by macrophages	1.16e-07	Increased	2.011	bias	FCER1G	FCGR2A	FCGR2B	INPP5D	ITGAM	ITGB2	SPI1	TREM2	8
Inflammatory Response	phagocytosis by macrophages	1.16e-07	Increased	2.011	bias	FCER1G	FCGR2A	FCGR2B	INPP5D	ITGAM	ITGB2	SPI1	TREM2	8
Hematological System Development and Function	phagocytosis by macrophages	1.16e-07	Increased	2.011	bias	FCER1G	FCGR2A	FCGR2B	INPP5D	ITGAM	ITGB2	SPI1	TREM2	8
Cellular Function and Maintenance	phagocytosis by macrophages	1.16e-07	Increased	2.011	bias	FCER1G	FCGR2A	FCGR2B	INPP5D	ITGAM	ITGB2	SPI1	TREM2	8
Cell Morphology	morphology of mononuclear leukocytes	1.16e-07	Decreased	-2.219	bias	B2M	CD84	CSF3R	FCER1G	FCGR2B	HLA-B	INPP5D	IRF8	LCP2	LYN	SPI1	11
Inflammatory Response	aggregation of blood platelets	1.18e-07	Increased	2.595	bias	CD9	FCER1G	FCGR2A	IGF1	INPP5D	LCP2	LYN	PIK3CG	PLEK	TBXAS1	10
Hematological System Development and Function	aggregation of blood platelets	1.18e-07	Increased	2.595	bias	CD9	FCER1G	FCGR2A	IGF1	INPP5D	LCP2	LYN	PIK3CG	PLEK	TBXAS1	10
Tissue Development	aggregation of blood platelets	1.18e-07	Increased	2.595	bias	CD9	FCER1G	FCGR2A	IGF1	INPP5D	LCP2	LYN	PIK3CG	PLEK	TBXAS1	10
Cellular Function and Maintenance	ion homeostasis of cells	1.19e-07		1.35	bias	C3AR1	CCL3L1/CCL3L3	CLEC7A	FCGR2A	FCGR2B	HEXB	IGF1	INPP5D	ITGB2	LCP2	LYN	PIK3CG	S1PR3	SLC11A1	SLC14A1	TBXAS1	TF	17
Hematological System Development and Function	differentiation of T lymphocytes	1.24e-07	Increased	2.586	bias	B2M	BCL2A1	C3AR1	FCGR2B	IGF1	IRF8	ITGB2	LCP2	NCKAP1L	PIK3CG	RUNX1	SPI1	STAT3	TLR7	14
Cellular Function and Maintenance	differentiation of T lymphocytes	1.24e-07	Increased	2.586	bias	B2M	BCL2A1	C3AR1	FCGR2B	IGF1	IRF8	ITGB2	LCP2	NCKAP1L	PIK3CG	RUNX1	SPI1	STAT3	TLR7	14
Cellular Development	differentiation of T lymphocytes	1.24e-07	Increased	2.586	bias	B2M	BCL2A1	C3AR1	FCGR2B	IGF1	IRF8	ITGB2	LCP2	NCKAP1L	PIK3CG	RUNX1	SPI1	STAT3	TLR7	14
Hematopoiesis	differentiation of T lymphocytes	1.24e-07	Increased	2.586	bias	B2M	BCL2A1	C3AR1	FCGR2B	IGF1	IRF8	ITGB2	LCP2	NCKAP1L	PIK3CG	RUNX1	SPI1	STAT3	TLR7	14
Lymphoid Tissue Structure and Development	differentiation of T lymphocytes	1.24e-07	Increased	2.586	bias	B2M	BCL2A1	C3AR1	FCGR2B	IGF1	IRF8	ITGB2	LCP2	NCKAP1L	PIK3CG	RUNX1	SPI1	STAT3	TLR7	14
Cell-mediated Immune Response	differentiation of T lymphocytes	1.24e-07	Increased	2.586	bias	B2M	BCL2A1	C3AR1	FCGR2B	IGF1	IRF8	ITGB2	LCP2	NCKAP1L	PIK3CG	RUNX1	SPI1	STAT3	TLR7	14
Hematological System Development and Function	migration of mononuclear leukocytes	1.24e-07	Increased	2.676	bias	CCL3L1/CCL3L3	CMKLR1	CTSS	INPP5D	ITGAM	ITGAX	ITGB2	LAG3	LCP1	PIK3CG	RUNX1	S1PR3	SELPLG	STAT3	14
Cellular Movement	migration of mononuclear leukocytes	1.24e-07	Increased	2.676	bias	CCL3L1/CCL3L3	CMKLR1	CTSS	INPP5D	ITGAM	ITGAX	ITGB2	LAG3	LCP1	PIK3CG	RUNX1	S1PR3	SELPLG	STAT3	14
Immune Cell Trafficking	migration of mononuclear leukocytes	1.24e-07	Increased	2.676	bias	CCL3L1/CCL3L3	CMKLR1	CTSS	INPP5D	ITGAM	ITGAX	ITGB2	LAG3	LCP1	PIK3CG	RUNX1	S1PR3	SELPLG	STAT3	14
Hematological System Development and Function	differentiation of mononuclear leukocytes	1.32e-07	Increased	3.038	bias	B2M	BCL2A1	C3AR1	CSF1R	FCGR2B	IGF1	INPP5D	IRF8	ITGB2	LCP2	LYN	NCKAP1L	PIK3CG	RUNX1	SPI1	STAT3	TLR7	17
Cellular Development	differentiation of mononuclear leukocytes	1.32e-07	Increased	3.038	bias	B2M	BCL2A1	C3AR1	CSF1R	FCGR2B	IGF1	INPP5D	IRF8	ITGB2	LCP2	LYN	NCKAP1L	PIK3CG	RUNX1	SPI1	STAT3	TLR7	17
Hematopoiesis	differentiation of mononuclear leukocytes	1.32e-07	Increased	3.038	bias	B2M	BCL2A1	C3AR1	CSF1R	FCGR2B	IGF1	INPP5D	IRF8	ITGB2	LCP2	LYN	NCKAP1L	PIK3CG	RUNX1	SPI1	STAT3	TLR7	17
Free Radical Scavenging	synthesis of reactive oxygen species	1.38e-07	Increased	2.732		FCGR2A	GRN	HVCN1	IGF1	ITGAM	ITGAX	ITGB2	LCP2	LYN	PIK3CG	SELPLG	SPI1	STAT3	TF	TLR7	TYROBP	16
Tissue Development	aggregation of cells	1.72e-07	Increased	2.955	bias	CD9	FCER1G	FCGR2A	IGF1	INPP5D	ITGB2	LCP2	LYN	PIK3CG	PLEK	SELPLG	STAT3	TBXAS1	13
Cell-To-Cell Signaling and Interaction	adhesion of antigen presenting cells	1.77e-07		1.091	bias	CTSZ	ITGAM	ITGB2	LYN	PIK3CG	SPI1	6
Hematological System Development and Function	adhesion of antigen presenting cells	1.77e-07		1.091	bias	CTSZ	ITGAM	ITGB2	LYN	PIK3CG	SPI1	6
Immune Cell Trafficking	adhesion of antigen presenting cells	1.77e-07		1.091	bias	CTSZ	ITGAM	ITGB2	LYN	PIK3CG	SPI1	6
Tissue Development	adhesion of antigen presenting cells	1.77e-07		1.091	bias	CTSZ	ITGAM	ITGB2	LYN	PIK3CG	SPI1	6
Cellular Function and Maintenance	function of dendritic cells	2.05e-07				CHI3L1	CLEC7A	CMKLR1	CSF1R	CTSZ	SAMSN1	TLR7	TYROBP	8
Hematological System Development and Function	differentiation of lymphocytes	2.3e-07	Increased	2.726	bias	B2M	BCL2A1	C3AR1	FCGR2B	IGF1	INPP5D	IRF8	ITGB2	LCP2	LYN	NCKAP1L	PIK3CG	RUNX1	SPI1	STAT3	TLR7	16
Cellular Development	differentiation of lymphocytes	2.3e-07	Increased	2.726	bias	B2M	BCL2A1	C3AR1	FCGR2B	IGF1	INPP5D	IRF8	ITGB2	LCP2	LYN	NCKAP1L	PIK3CG	RUNX1	SPI1	STAT3	TLR7	16
Hematopoiesis	differentiation of lymphocytes	2.3e-07	Increased	2.726	bias	B2M	BCL2A1	C3AR1	FCGR2B	IGF1	INPP5D	IRF8	ITGB2	LCP2	LYN	NCKAP1L	PIK3CG	RUNX1	SPI1	STAT3	TLR7	16
Immunological Disease	anaphylaxis	2.4e-07	Increased	2.183	bias	FCER1G	FCGR2A	FCGR2B	LCP2	LYN	PIK3CG	6
Immunological Disease	complement component C1q deficiency	2.46e-07				C1QA	C1QB	C1QC	3
Developmental Disorder	complement component C1q deficiency	2.46e-07				C1QA	C1QB	C1QC	3
Hereditary Disorder	complement component C1q deficiency	2.46e-07				C1QA	C1QB	C1QC	3
Cell-To-Cell Signaling and Interaction	adhesion of macrophages	2.82e-07				CTSZ	ITGB2	LYN	PIK3CG	SPI1	5
Inflammatory Response	adhesion of macrophages	2.82e-07				CTSZ	ITGB2	LYN	PIK3CG	SPI1	5
Hematological System Development and Function	adhesion of macrophages	2.82e-07				CTSZ	ITGB2	LYN	PIK3CG	SPI1	5
Immune Cell Trafficking	adhesion of macrophages	2.82e-07				CTSZ	ITGB2	LYN	PIK3CG	SPI1	5
Tissue Development	adhesion of macrophages	2.82e-07				CTSZ	ITGB2	LYN	PIK3CG	SPI1	5
Carbohydrate Metabolism	metabolism of phosphoinositide	2.83e-07		1.212	bias	FCGR2A	FCGR2B	IGF1	INPP5D	ITGB2	LYN	PIK3CG	7
Lipid Metabolism	metabolism of phosphoinositide	2.83e-07		1.212	bias	FCGR2A	FCGR2B	IGF1	INPP5D	ITGB2	LYN	PIK3CG	7
Small Molecule Biochemistry	metabolism of phosphoinositide	2.83e-07		1.212	bias	FCGR2A	FCGR2B	IGF1	INPP5D	ITGB2	LYN	PIK3CG	7
Cell-To-Cell Signaling and Interaction	recruitment of phagocytes	2.84e-07	Increased	2.37	bias	C3AR1	CCL3L1/CCL3L3	CHI3L1	CMKLR1	CSF1R	FCGR2A	FCGR2B	INPP5D	ITGAM	ITGB2	PIK3CG	11
Inflammatory Response	recruitment of phagocytes	2.84e-07	Increased	2.37	bias	C3AR1	CCL3L1/CCL3L3	CHI3L1	CMKLR1	CSF1R	FCGR2A	FCGR2B	INPP5D	ITGAM	ITGB2	PIK3CG	11
Hematological System Development and Function	recruitment of phagocytes	2.84e-07	Increased	2.37	bias	C3AR1	CCL3L1/CCL3L3	CHI3L1	CMKLR1	CSF1R	FCGR2A	FCGR2B	INPP5D	ITGAM	ITGB2	PIK3CG	11
Cellular Movement	recruitment of phagocytes	2.84e-07	Increased	2.37	bias	C3AR1	CCL3L1/CCL3L3	CHI3L1	CMKLR1	CSF1R	FCGR2A	FCGR2B	INPP5D	ITGAM	ITGB2	PIK3CG	11
Immune Cell Trafficking	recruitment of phagocytes	2.84e-07	Increased	2.37	bias	C3AR1	CCL3L1/CCL3L3	CHI3L1	CMKLR1	CSF1R	FCGR2A	FCGR2B	INPP5D	ITGAM	ITGB2	PIK3CG	11
Hematological System Development and Function	infiltration of leukocytes	2.85e-07		0.457		CCL3L1/CCL3L3	CLEC5A	CMKLR1	CSF1R	FCER1G	FCGR2B	GFAP	INPP5D	ITGAM	ITGB2	LAG3	PIK3CG	SELPLG	STAT3	14
Cellular Movement	infiltration of leukocytes	2.85e-07		0.457		CCL3L1/CCL3L3	CLEC5A	CMKLR1	CSF1R	FCER1G	FCGR2B	GFAP	INPP5D	ITGAM	ITGB2	LAG3	PIK3CG	SELPLG	STAT3	14
Immune Cell Trafficking	infiltration of leukocytes	2.85e-07		0.457		CCL3L1/CCL3L3	CLEC5A	CMKLR1	CSF1R	FCER1G	FCGR2B	GFAP	INPP5D	ITGAM	ITGB2	LAG3	PIK3CG	SELPLG	STAT3	14
Hematological Disease	cytopenia	2.88e-07		0.321	bias	CCL3L1/CCL3L3	CSF3R	FCER1G	FCGR2A	FCGR2B	INPP5D	PIK3CG	RUNX1	SLC11A1	TLR7	10
Hematological System Development and Function	cell viability of myeloid cells	3.44e-07		1.706	bias	BCL2A1	CSF1R	INPP5D	ITGB2	LYN	STAT3	TYROBP	7
Cell Death and Survival	cell viability of myeloid cells	3.44e-07		1.706	bias	BCL2A1	CSF1R	INPP5D	ITGB2	LYN	STAT3	TYROBP	7
Molecular Transport	release of reactive oxygen species	3.67e-07		0.713	bias	FCER1G	FCGR2A	GRN	IGF1	ITGB2	LYN	6
Free Radical Scavenging	release of reactive oxygen species	3.67e-07		0.713	bias	FCER1G	FCGR2A	GRN	IGF1	ITGB2	LYN	6
Cell Death and Survival	cell death of lymphocytes	3.81e-07	Decreased	-2.685		BCL2A1	CD9	CHI3L1	CTSD	FCGR2B	IGF1	INPP5D	KLK6	LAG3	LYN	PIK3CG	RUNX1	SPI1	STAT3	14
Cellular Growth and Proliferation	expansion of cells	4.25e-07		-0.956	bias	B2M	CD180	CMKLR1	CSF1R	CTSD	FCGR2B	LAG3	LCP2	LYN	RUNX1	SPI1	STAT3	12
Tissue Morphology	quantity of lymphatic system cells	4.25e-07		0.839	bias	BCL2A1	CD180	CD84	CD9	CSF3R	IGF1	INPP5D	IRF8	ITGB2	LYN	S1PR3	TYROBP	12
Lymphoid Tissue Structure and Development	quantity of lymphatic system cells	4.25e-07		0.839	bias	BCL2A1	CD180	CD84	CD9	CSF3R	IGF1	INPP5D	IRF8	ITGB2	LYN	S1PR3	TYROBP	12
Hematological System Development and Function	morphology of granulocytes	4.4e-07				FCGR2B	ITGAM	ITGB2	PIK3CG	SPI1	5
Cell Morphology	morphology of granulocytes	4.4e-07				FCGR2B	ITGAM	ITGB2	PIK3CG	SPI1	5
Cell-To-Cell Signaling and Interaction	signaling of leukocytes	4.4e-07				CLEC7A	ITGAM	ITGB2	LCP2	PIK3CG	5
Cell Morphology	abnormal morphology of leukocytes	4.47e-07				B2M	CD84	FCER1G	FCGR2B	Gp49a/Lilrb4	INPP5D	IRF8	ITGB2	LCP2	LYN	SPI1	11
Inflammatory Response	accumulation of antigen presenting cells	4.57e-07		0.378	bias	GRN	INPP5D	ITGAM	ITGAX	STAT3	TLR7	TYROBP	7
Hematological System Development and Function	accumulation of antigen presenting cells	4.57e-07		0.378	bias	GRN	INPP5D	ITGAM	ITGAX	STAT3	TLR7	TYROBP	7
Immune Cell Trafficking	accumulation of antigen presenting cells	4.57e-07		0.378	bias	GRN	INPP5D	ITGAM	ITGAX	STAT3	TLR7	TYROBP	7
Tissue Development	accumulation of antigen presenting cells	4.57e-07		0.378	bias	GRN	INPP5D	ITGAM	ITGAX	STAT3	TLR7	TYROBP	7
Hematological System Development and Function	proliferation of hematopoietic progenitor cells	4.65e-07		1.132	bias	CSF1R	CSF3R	Gp49a/Lilrb4	IRF8	LCP2	MAFB	PIK3CG	RASGRP3	RUNX1	SPI1	STAT3	11
Cellular Development	proliferation of hematopoietic progenitor cells	4.65e-07		1.132	bias	CSF1R	CSF3R	Gp49a/Lilrb4	IRF8	LCP2	MAFB	PIK3CG	RASGRP3	RUNX1	SPI1	STAT3	11
Cellular Growth and Proliferation	proliferation of hematopoietic progenitor cells	4.65e-07		1.132	bias	CSF1R	CSF3R	Gp49a/Lilrb4	IRF8	LCP2	MAFB	PIK3CG	RASGRP3	RUNX1	SPI1	STAT3	11
Hematopoiesis	proliferation of hematopoietic progenitor cells	4.65e-07		1.132	bias	CSF1R	CSF3R	Gp49a/Lilrb4	IRF8	LCP2	MAFB	PIK3CG	RASGRP3	RUNX1	SPI1	STAT3	11
Molecular Transport	quantity of metal	4.79e-07		1.754	bias	B2M	C3AR1	CCL3L1/CCL3L3	CYBRD1	FCER1G	FCGR2A	HLA-B	IGF1	INPP5D	ITGAM	LCP2	LYN	PIK3CG	RASGRP3	S1PR3	TF	16
Cell-To-Cell Signaling and Interaction	adhesion of monocytes	4.79e-07	Increased	2.393	bias	CCL3L1/CCL3L3	ITGAM	ITGAX	ITGB2	LCP1	PIK3CG	6
Inflammatory Response	adhesion of monocytes	4.79e-07	Increased	2.393	bias	CCL3L1/CCL3L3	ITGAM	ITGAX	ITGB2	LCP1	PIK3CG	6
Hematological System Development and Function	adhesion of monocytes	4.79e-07	Increased	2.393	bias	CCL3L1/CCL3L3	ITGAM	ITGAX	ITGB2	LCP1	PIK3CG	6
Immune Cell Trafficking	adhesion of monocytes	4.79e-07	Increased	2.393	bias	CCL3L1/CCL3L3	ITGAM	ITGAX	ITGB2	LCP1	PIK3CG	6
Tissue Development	adhesion of monocytes	4.79e-07	Increased	2.393	bias	CCL3L1/CCL3L3	ITGAM	ITGAX	ITGB2	LCP1	PIK3CG	6
Inflammatory Response	antigen presentation	5.01e-07				CD68	CTSD	CTSS	FCER1G	FCGR2A	Gp49a/Lilrb4	UNC93B1	7
Antigen Presentation	antigen presentation	5.01e-07				CD68	CTSD	CTSS	FCER1G	FCGR2A	Gp49a/Lilrb4	UNC93B1	7
Hematological System Development and Function	cell movement of mononuclear leukocytes	5.13e-07	Increased	2.507	bias	CCL3L1/CCL3L3	CMKLR1	CTSS	INPP5D	ITGAM	ITGAX	ITGB2	LAG3	LCP1	PIK3CG	RUNX1	S1PR3	SELPLG	SERPINA3	STAT3	15
Cellular Movement	cell movement of mononuclear leukocytes	5.13e-07	Increased	2.507	bias	CCL3L1/CCL3L3	CMKLR1	CTSS	INPP5D	ITGAM	ITGAX	ITGB2	LAG3	LCP1	PIK3CG	RUNX1	S1PR3	SELPLG	SERPINA3	STAT3	15
Immune Cell Trafficking	cell movement of mononuclear leukocytes	5.13e-07	Increased	2.507	bias	CCL3L1/CCL3L3	CMKLR1	CTSS	INPP5D	ITGAM	ITGAX	ITGB2	LAG3	LCP1	PIK3CG	RUNX1	S1PR3	SELPLG	SERPINA3	STAT3	15
Cell Morphology	abnormal morphology of cells	5.45e-07				B2M	C1QA	C3AR1	CD68	CD84	CLDN11	CSF1R	FCER1G	FCGR2B	GFAP	Gp49a/Lilrb4	GRN	HEXA	HEXB	IGF1	IGFBP5	INPP5D	IRF8	ITGB2	LCP2	LYN	MAFB	MAN2B1	MYO1E	S1PR3	SPI1	TYROBP	27
Connective Tissue Development and Function	resorption of bone	5.56e-07		1.942		CD68	CSF1R	CTSS	FCER1G	IGF1	IGFBP5	INPP5D	TF	TYROBP	9
Organ Development	resorption of bone	5.56e-07		1.942		CD68	CSF1R	CTSS	FCER1G	IGF1	IGFBP5	INPP5D	TF	TYROBP	9
Skeletal and Muscular System Development and Function	resorption of bone	5.56e-07		1.942		CD68	CSF1R	CTSS	FCER1G	IGF1	IGFBP5	INPP5D	TF	TYROBP	9
Organismal Development	morphology of body cavity	6.07e-07				B2M	CD9	CLEC7A	CMKLR1	CSF1R	CTSD	FCER1G	FCGR2B	GRN	HEXA	HEXB	IGF1	IGFBP5	INPP5D	IRF8	ITGB2	LAG3	LCP2	LYN	MAN2B1	OSMR	PIK3CG	RUNX1	SPI1	STAT3	25
Cell Morphology	morphology of antigen presenting cells	6.52e-07				CHI3L1	CMKLR1	CSF1R	CTSD	CTSZ	HEXB	MAN2B1	SPI1	8
Connective Tissue Disorders	adjuvant arthritis	6.62e-07				CCL3L1/CCL3L3	FCGR2A	FCGR2B	PIK3CG	STAT3	5
Inflammatory Disease	adjuvant arthritis	6.62e-07				CCL3L1/CCL3L3	FCGR2A	FCGR2B	PIK3CG	STAT3	5
Skeletal and Muscular Disorders	adjuvant arthritis	6.62e-07				CCL3L1/CCL3L3	FCGR2A	FCGR2B	PIK3CG	STAT3	5
Hematological System Development and Function	differentiation of hematopoietic cells	6.63e-07		1.432	bias	CSF1R	CSF3R	FCGR2B	IGF1	IRF8	LCP2	LYN	MAFB	RUNX1	SPI1	STAT3	11
Cellular Development	differentiation of hematopoietic cells	6.63e-07		1.432	bias	CSF1R	CSF3R	FCGR2B	IGF1	IRF8	LCP2	LYN	MAFB	RUNX1	SPI1	STAT3	11
Hematopoiesis	differentiation of hematopoietic cells	6.63e-07		1.432	bias	CSF1R	CSF3R	FCGR2B	IGF1	IRF8	LCP2	LYN	MAFB	RUNX1	SPI1	STAT3	11
Cell Death and Survival	cell death of leukemia cell lines	6.66e-07		-0.632		B2M	BCL2A1	CTSD	IGF1	INPP5D	ITGAM	KLK6	LYN	MSN	RUNX1	S1PR3	STAT3	12
Cell Morphology	morphology of lymphocytes	6.73e-07	Decreased	-2.219	bias	B2M	CD84	FCER1G	FCGR2B	HLA-B	INPP5D	IRF8	LCP2	LYN	SPI1	10
Cell Death and Survival	cell death of myeloid cells	7.04e-07		-0.059		BCL2A1	C1QA	IGF1	INPP5D	IRF8	ITGAM	ITGB2	LYN	NAIP	STAT3	10
Hematological System Development and Function	cell movement of T lymphocytes	7.36e-07		1.833	bias	CCL3L1/CCL3L3	CTSS	INPP5D	ITGB2	LAG3	LCP1	PIK3CG	RUNX1	SELPLG	STAT3	10
Cellular Movement	cell movement of T lymphocytes	7.36e-07		1.833	bias	CCL3L1/CCL3L3	CTSS	INPP5D	ITGB2	LAG3	LCP1	PIK3CG	RUNX1	SELPLG	STAT3	10
Immune Cell Trafficking	cell movement of T lymphocytes	7.36e-07		1.833	bias	CCL3L1/CCL3L3	CTSS	INPP5D	ITGB2	LAG3	LCP1	PIK3CG	RUNX1	SELPLG	STAT3	10
Cell-mediated Immune Response	cell movement of T lymphocytes	7.36e-07		1.833	bias	CCL3L1/CCL3L3	CTSS	INPP5D	ITGB2	LAG3	LCP1	PIK3CG	RUNX1	SELPLG	STAT3	10
Cell-To-Cell Signaling and Interaction	activation of B lymphocytes	7.94e-07		-1.937	bias	C1QA	CD180	FCGR2B	IGF1	INPP5D	ITGB2	LYN	SAMSN1	8
Inflammatory Response	activation of B lymphocytes	7.94e-07		-1.937	bias	C1QA	CD180	FCGR2B	IGF1	INPP5D	ITGB2	LYN	SAMSN1	8
Hematological System Development and Function	activation of B lymphocytes	7.94e-07		-1.937	bias	C1QA	CD180	FCGR2B	IGF1	INPP5D	ITGB2	LYN	SAMSN1	8
Immune Cell Trafficking	activation of B lymphocytes	7.94e-07		-1.937	bias	C1QA	CD180	FCGR2B	IGF1	INPP5D	ITGB2	LYN	SAMSN1	8
Humoral Immune Response	activation of B lymphocytes	7.94e-07		-1.937	bias	C1QA	CD180	FCGR2B	IGF1	INPP5D	ITGB2	LYN	SAMSN1	8
Free Radical Scavenging	production of reactive oxygen species	8.19e-07	Increased	2.663		FCGR2A	GRN	HVCN1	IGF1	ITGAM	ITGAX	ITGB2	LCP2	LYN	PIK3CG	SELPLG	SPI1	TYROBP	13
Organ Morphology	size of bone	8.97e-07		0.19		CD68	CSF1R	FCER1G	HEXA	HEXB	IGF1	IGFBP5	INPP5D	ITGB2	PIK3CG	TYROBP	11
Skeletal and Muscular System Development and Function	size of bone	8.97e-07		0.19		CD68	CSF1R	FCER1G	HEXA	HEXB	IGF1	IGFBP5	INPP5D	ITGB2	PIK3CG	TYROBP	11
Lipid Metabolism	synthesis of prostaglandin	1.1e-06	Increased	2.969	bias	CLEC7A	FCER1G	FCGR2A	FCGR2B	HPGDS	IGF1	LYN	S1PR3	STAT3	9
Small Molecule Biochemistry	synthesis of prostaglandin	1.1e-06	Increased	2.969	bias	CLEC7A	FCER1G	FCGR2A	FCGR2B	HPGDS	IGF1	LYN	S1PR3	STAT3	9
Cell Death and Survival	cytolysis of leukocytes	1.17e-06				FCER1G	FCGR2A	HLA-B	ITGB2	LCP2	PIK3CG	TYROBP	7
Cell-To-Cell Signaling and Interaction	immune response of tumor cell lines	1.23e-06		0.97	bias	CTSD	FCGR2A	FCGR2B	INPP5D	ITGAM	LYN	SPI1	STAT3	8
Inflammatory Response	immune response of tumor cell lines	1.23e-06		0.97	bias	CTSD	FCGR2A	FCGR2B	INPP5D	ITGAM	LYN	SPI1	STAT3	8
Infectious Disease	Parasitic Infection	1.27e-06		-0.378	bias	B2M	BCL2A1	FCER1G	FCGR2A	FCGR2B	IRF8	SLC11A1	TLR7	UNC93B1	9
Immunological Disease	immediate hypersensitivity	1.28e-06		1.114		C3AR1	FCER1G	FCGR2A	FCGR2B	Gp49a/Lilrb4	KLK6	LCP2	LYN	MSN	OSMR	PIK3CG	SPI1	12
Cellular Movement	invasion of cells	1.28e-06	Increased	3.033	bias	CD53	CD9	CHI3L1	CTSD	CTSS	CTSZ	GRN	IGF1	ITGAM	ITGAX	ITGB2	KLK6	LCP1	LYN	PIK3CG	S1PR3	SPI1	STAT3	TREM2	19
Cellular Growth and Proliferation	generation of phagocytes	1.37e-06		1.457	bias	IRF8	LYN	SPI1	STAT3	TLR7	5
Tissue Development	generation of phagocytes	1.37e-06		1.457	bias	IRF8	LYN	SPI1	STAT3	TLR7	5
Hematological System Development and Function	differentiation of phagocytes	1.39e-06		0.718	bias	C1QC	CSF1R	INPP5D	IRF8	ITGAM	LYN	RUNX1	SPI1	STAT3	TYROBP	10
Cellular Development	differentiation of phagocytes	1.39e-06		0.718	bias	C1QC	CSF1R	INPP5D	IRF8	ITGAM	LYN	RUNX1	SPI1	STAT3	TYROBP	10
Hematopoiesis	differentiation of phagocytes	1.39e-06		0.718	bias	C1QC	CSF1R	INPP5D	IRF8	ITGAM	LYN	RUNX1	SPI1	STAT3	TYROBP	10
Inflammatory Response	morphology of neutrophils	1.44e-06				FCGR2B	ITGAM	ITGB2	PIK3CG	4
Hematological System Development and Function	morphology of neutrophils	1.44e-06				FCGR2B	ITGAM	ITGB2	PIK3CG	4
Cell Morphology	morphology of neutrophils	1.44e-06				FCGR2B	ITGAM	ITGB2	PIK3CG	4
Carbohydrate Metabolism	metabolism of phosphatidic acid	1.47e-06		1.524	bias	FCGR2A	FCGR2B	IGF1	INPP5D	ITGB2	LYN	PIK3CG	PLEK	SPI1	9
Lipid Metabolism	metabolism of phosphatidic acid	1.47e-06		1.524	bias	FCGR2A	FCGR2B	IGF1	INPP5D	ITGB2	LYN	PIK3CG	PLEK	SPI1	9
Small Molecule Biochemistry	metabolism of phosphatidic acid	1.47e-06		1.524	bias	FCGR2A	FCGR2B	IGF1	INPP5D	ITGB2	LYN	PIK3CG	PLEK	SPI1	9
Hematological Disease	thrombocytopenia	1.66e-06				CCL3L1/CCL3L3	CSF3R	FCER1G	FCGR2A	FCGR2B	INPP5D	RUNX1	SLC11A1	8
Hematological System Development and Function	development of antigen presenting cells	1.71e-06				CD9	CSF1R	IRF8	MAFB	SPI1	STAT3	6
Cellular Development	development of antigen presenting cells	1.71e-06				CD9	CSF1R	IRF8	MAFB	SPI1	STAT3	6
Hematopoiesis	development of antigen presenting cells	1.71e-06				CD9	CSF1R	IRF8	MAFB	SPI1	STAT3	6
Lymphoid Tissue Structure and Development	development of antigen presenting cells	1.71e-06				CD9	CSF1R	IRF8	MAFB	SPI1	STAT3	6
Cell Death and Survival	apoptosis of myeloid cells	1.78e-06		-0.407		BCL2A1	C1QA	IGF1	INPP5D	IRF8	ITGAM	ITGB2	LYN	STAT3	9
Carbohydrate Metabolism	metabolism of carbohydrate	1.79e-06		1.228	bias	CSF1R	FCGR2A	FCGR2B	GUSB	HEXA	HEXB	IGF1	IGFBP5	INPP5D	ITGB2	LYN	MAN2B1	PIK3CG	PLEK	S1PR3	SPI1	STAT3	17
Cell Morphology	abnormal morphology of lymphocytes	1.87e-06				B2M	CD84	FCER1G	FCGR2B	INPP5D	IRF8	LCP2	LYN	SPI1	9
Hematological System Development and Function	expansion of mononuclear leukocytes	1.87e-06		-1.236	bias	B2M	CD180	CSF1R	CTSD	FCGR2B	LAG3	LCP2	SPI1	STAT3	9
Cellular Development	expansion of mononuclear leukocytes	1.87e-06		-1.236	bias	B2M	CD180	CSF1R	CTSD	FCGR2B	LAG3	LCP2	SPI1	STAT3	9
Cellular Growth and Proliferation	expansion of mononuclear leukocytes	1.87e-06		-1.236	bias	B2M	CD180	CSF1R	CTSD	FCGR2B	LAG3	LCP2	SPI1	STAT3	9
Immunological Disease	abnormal quantity of INTERLEUKIN	1.89e-06				B2M	C3AR1	Gp49a/Lilrb4	INPP5D	TREM2	5
Inflammatory Response	accumulation of neutrophils	1.89e-06		1.432	bias	FCGR2A	GRN	INPP5D	ITGAM	ITGB2	SELPLG	6
Hematological System Development and Function	accumulation of neutrophils	1.89e-06		1.432	bias	FCGR2A	GRN	INPP5D	ITGAM	ITGB2	SELPLG	6
Immune Cell Trafficking	accumulation of neutrophils	1.89e-06		1.432	bias	FCGR2A	GRN	INPP5D	ITGAM	ITGB2	SELPLG	6
Tissue Development	accumulation of neutrophils	1.89e-06		1.432	bias	FCGR2A	GRN	INPP5D	ITGAM	ITGB2	SELPLG	6
Cell-To-Cell Signaling and Interaction	activation of mast cells	1.89e-06				FCER1G	FCGR2A	ITGAM	LCP2	LYN	TLR7	6
Inflammatory Response	activation of mast cells	1.89e-06				FCER1G	FCGR2A	ITGAM	LCP2	LYN	TLR7	6
Hematological System Development and Function	activation of mast cells	1.89e-06				FCER1G	FCGR2A	ITGAM	LCP2	LYN	TLR7	6
Immune Cell Trafficking	activation of mast cells	1.89e-06				FCER1G	FCGR2A	ITGAM	LCP2	LYN	TLR7	6
Hypersensitivity Response	activation of mast cells	1.89e-06				FCER1G	FCGR2A	ITGAM	LCP2	LYN	TLR7	6
Cell-To-Cell Signaling and Interaction	binding of blood cells	1.91e-06	Increased	3.044	bias	CD84	FCGR2A	FCGR2B	IRF8	ITGAM	ITGB2	LCP2	LYN	MSN	SELPLG	10
Hematological System Development and Function	Lymphocyte migration	2.02e-06	Increased	2.441	bias	CCL3L1/CCL3L3	CMKLR1	CTSS	INPP5D	ITGB2	LAG3	LCP1	PIK3CG	RUNX1	S1PR3	SELPLG	STAT3	12
Cellular Movement	Lymphocyte migration	2.02e-06	Increased	2.441	bias	CCL3L1/CCL3L3	CMKLR1	CTSS	INPP5D	ITGB2	LAG3	LCP1	PIK3CG	RUNX1	S1PR3	SELPLG	STAT3	12
Immune Cell Trafficking	Lymphocyte migration	2.02e-06	Increased	2.441	bias	CCL3L1/CCL3L3	CMKLR1	CTSS	INPP5D	ITGB2	LAG3	LCP1	PIK3CG	RUNX1	S1PR3	SELPLG	STAT3	12
Immunological Disease	rheumatoid arthritis	2.09e-06				B2M	C1QA	C3AR1	CCL3L1/CCL3L3	CD68	CHI3L1	CSF3R	FCGR2A	FCGR2B	GFAP	GRN	HLA-B	IGF1	IGFBP5	ITGB2	LCP1	PIK3CG	TLR7	18
Connective Tissue Disorders	rheumatoid arthritis	2.09e-06				B2M	C1QA	C3AR1	CCL3L1/CCL3L3	CD68	CHI3L1	CSF3R	FCGR2A	FCGR2B	GFAP	GRN	HLA-B	IGF1	IGFBP5	ITGB2	LCP1	PIK3CG	TLR7	18
Inflammatory Disease	rheumatoid arthritis	2.09e-06				B2M	C1QA	C3AR1	CCL3L1/CCL3L3	CD68	CHI3L1	CSF3R	FCGR2A	FCGR2B	GFAP	GRN	HLA-B	IGF1	IGFBP5	ITGB2	LCP1	PIK3CG	TLR7	18
Skeletal and Muscular Disorders	rheumatoid arthritis	2.09e-06				B2M	C1QA	C3AR1	CCL3L1/CCL3L3	CD68	CHI3L1	CSF3R	FCGR2A	FCGR2B	GFAP	GRN	HLA-B	IGF1	IGFBP5	ITGB2	LCP1	PIK3CG	TLR7	18
Hematological System Development and Function	quantity of Single positive thymocytes	2.09e-06		0.816		B2M	FCGR2B	ITGB2	LAG3	LCP2	RUNX1	6
Tissue Morphology	quantity of Single positive thymocytes	2.09e-06		0.816		B2M	FCGR2B	ITGB2	LAG3	LCP2	RUNX1	6
Hematopoiesis	quantity of Single positive thymocytes	2.09e-06		0.816		B2M	FCGR2B	ITGB2	LAG3	LCP2	RUNX1	6
Cell Death and Survival	cell viability of blood cells	2.16e-06	Increased	2.575	bias	BCL2A1	CSF1R	FCER1G	INPP5D	ITGB2	KLK6	LYN	PIK3CG	RUNX1	STAT3	TYROBP	11
Lymphoid Tissue Structure and Development	abnormal morphology of spleen	2.24e-06				CSF1R	CTSD	FCGR2B	INPP5D	IRF8	ITGB2	LAG3	LCP2	LYN	MAN2B1	SPI1	11
Organ Morphology	abnormal morphology of spleen	2.24e-06				CSF1R	CTSD	FCGR2B	INPP5D	IRF8	ITGB2	LAG3	LCP2	LYN	MAN2B1	SPI1	11
Organismal Development	abnormal morphology of spleen	2.24e-06				CSF1R	CTSD	FCGR2B	INPP5D	IRF8	ITGB2	LAG3	LCP2	LYN	MAN2B1	SPI1	11
Cell-To-Cell Signaling and Interaction	activation of blood platelets	2.29e-06		1.067	bias	FCER1G	FCGR2A	INPP5D	LCP2	LYN	PLEK	SELPLG	7
Inflammatory Response	activation of blood platelets	2.29e-06		1.067	bias	FCER1G	FCGR2A	INPP5D	LCP2	LYN	PLEK	SELPLG	7
Hematological System Development and Function	activation of blood platelets	2.29e-06		1.067	bias	FCER1G	FCGR2A	INPP5D	LCP2	LYN	PLEK	SELPLG	7
Organismal Functions	activation of blood platelets	2.29e-06		1.067	bias	FCER1G	FCGR2A	INPP5D	LCP2	LYN	PLEK	SELPLG	7
Cell-To-Cell Signaling and Interaction	phagocytosis of tumor cell lines	2.31e-06		0.651	bias	FCGR2A	FCGR2B	INPP5D	ITGAM	LYN	SPI1	6
Inflammatory Response	phagocytosis of tumor cell lines	2.31e-06		0.651	bias	FCGR2A	FCGR2B	INPP5D	ITGAM	LYN	SPI1	6
Cellular Function and Maintenance	phagocytosis of tumor cell lines	2.31e-06		0.651	bias	FCGR2A	FCGR2B	INPP5D	ITGAM	LYN	SPI1	6
Hematological System Development and Function	quantity of cytotoxic T cells	2.46e-06		1.604	bias	B2M	HLA-B	ITGAM	ITGB2	LAG3	LCP2	PIK3CG	SPI1	8
Tissue Morphology	quantity of cytotoxic T cells	2.46e-06		1.604	bias	B2M	HLA-B	ITGAM	ITGB2	LAG3	LCP2	PIK3CG	SPI1	8
Cell Death and Survival	apoptosis	2.52e-06		-1.349		B2M	BCL2A1	C1QA	CCL3L1/CCL3L3	CD53	CD9	CHI3L1	CLEC5A	CSF1R	CSF3R	CTSD	CTSS	FCER1G	FCGR2B	GRN	HEXB	HLA-B	HPGDS	IGF1	IGFBP5	INPP5D	IRF8	ITGAM	ITGB2	ITGB5	LAG3	LY86	LYN	MAFB	MSN	NAIP	NCKAP1L	PIK3CG	RUNX1	S1PR3	SERPINA3	SPI1	STAT3	TF	TYROBP	40
Cell-To-Cell Signaling and Interaction	response of leukemia cell lines	2.56e-06		0.555	bias	CTSD	FCGR2A	FCGR2B	INPP5D	SPI1	5
Cell-To-Cell Signaling and Interaction	phagocytosis by bone marrow-derived macrophages	2.59e-06		1.067	bias	FCGR2A	FCGR2B	INPP5D	ITGAM	4
Inflammatory Response	phagocytosis by bone marrow-derived macrophages	2.59e-06		1.067	bias	FCGR2A	FCGR2B	INPP5D	ITGAM	4
Hematological System Development and Function	phagocytosis by bone marrow-derived macrophages	2.59e-06		1.067	bias	FCGR2A	FCGR2B	INPP5D	ITGAM	4
Cellular Function and Maintenance	phagocytosis by bone marrow-derived macrophages	2.59e-06		1.067	bias	FCGR2A	FCGR2B	INPP5D	ITGAM	4
Cell Death and Survival	cell viability of phagocytes	2.83e-06	Increased	2.548	bias	BCL2A1	CSF1R	FCER1G	INPP5D	LYN	STAT3	TYROBP	7
Hematological System Development and Function	quantity of follicular B lymphocytes	2.83e-06		0.625	bias	BCL2A1	CD180	CD84	IRF8	LYN	S1PR3	TYROBP	7
Tissue Morphology	quantity of follicular B lymphocytes	2.83e-06		0.625	bias	BCL2A1	CD180	CD84	IRF8	LYN	S1PR3	TYROBP	7
Humoral Immune Response	quantity of follicular B lymphocytes	2.83e-06		0.625	bias	BCL2A1	CD180	CD84	IRF8	LYN	S1PR3	TYROBP	7
Lymphoid Tissue Structure and Development	quantity of follicular B lymphocytes	2.83e-06		0.625	bias	BCL2A1	CD180	CD84	IRF8	LYN	S1PR3	TYROBP	7
Immunological Disease	allergy	3.05e-06		1.474		C3AR1	CTSS	FCER1G	FCGR2A	FCGR2B	Gp49a/Lilrb4	KLK6	LCP2	LYN	MSN	OSMR	PIK3CG	SPI1	13
Immunological Disease	lupus erythematosus	3.05e-06				C1QA	C1QB	FCGR2A	FCGR2B	ITGAM	LYN	STAT3	TLR7	8
Connective Tissue Disorders	lupus erythematosus	3.05e-06				C1QA	C1QB	FCGR2A	FCGR2B	ITGAM	LYN	STAT3	TLR7	8
Inflammatory Disease	lupus erythematosus	3.05e-06				C1QA	C1QB	FCGR2A	FCGR2B	ITGAM	LYN	STAT3	TLR7	8
Skeletal and Muscular Disorders	lupus erythematosus	3.05e-06				C1QA	C1QB	FCGR2A	FCGR2B	ITGAM	LYN	STAT3	TLR7	8
Inflammatory Response	antimicrobial response	3.06e-06				CLEC5A	CLEC7A	FCER1G	HLA-B	IRF8	MYO1F	Oasl2	SLC11A1	TLR7	9
Antimicrobial Response	antimicrobial response	3.06e-06				CLEC5A	CLEC7A	FCER1G	HLA-B	IRF8	MYO1F	Oasl2	SLC11A1	TLR7	9
Inflammatory Response	accumulation of macrophages	3.36e-06		0.816	bias	GRN	INPP5D	ITGAM	ITGAX	STAT3	TLR7	6
Hematological System Development and Function	accumulation of macrophages	3.36e-06		0.816	bias	GRN	INPP5D	ITGAM	ITGAX	STAT3	TLR7	6
Immune Cell Trafficking	accumulation of macrophages	3.36e-06		0.816	bias	GRN	INPP5D	ITGAM	ITGAX	STAT3	TLR7	6
Tissue Development	accumulation of macrophages	3.36e-06		0.816	bias	GRN	INPP5D	ITGAM	ITGAX	STAT3	TLR7	6
Cell Morphology	cell spreading of blood cells	3.36e-06		0.294	bias	FCGR2A	INPP5D	ITGAM	ITGB2	LYN	SAMSN1	6
Cell Cycle	replication of cells	3.36e-06				CTSD	IGF1	IRF8	NAIP	SLC11A1	STAT3	6
Cell-To-Cell Signaling and Interaction	binding of neutrophils	3.4e-06	Increased	2.203	bias	FCGR2A	ITGAM	ITGB2	LYN	SELPLG	5
Inflammatory Response	binding of neutrophils	3.4e-06	Increased	2.203	bias	FCGR2A	ITGAM	ITGB2	LYN	SELPLG	5
Hematological System Development and Function	binding of neutrophils	3.4e-06	Increased	2.203	bias	FCGR2A	ITGAM	ITGB2	LYN	SELPLG	5
Immune Cell Trafficking	binding of neutrophils	3.4e-06	Increased	2.203	bias	FCGR2A	ITGAM	ITGB2	LYN	SELPLG	5
Tissue Development	binding of neutrophils	3.4e-06	Increased	2.203	bias	FCGR2A	ITGAM	ITGB2	LYN	SELPLG	5
Hematological System Development and Function	function of B lymphocytes	3.46e-06				CTSS	FCGR2A	INPP5D	LCP1	LYN	PIK3CG	S1PR3	7
Cellular Function and Maintenance	function of B lymphocytes	3.46e-06				CTSS	FCGR2A	INPP5D	LCP1	LYN	PIK3CG	S1PR3	7
Humoral Immune Response	function of B lymphocytes	3.46e-06				CTSS	FCGR2A	INPP5D	LCP1	LYN	PIK3CG	S1PR3	7
Cell Death and Survival	cell death	3.49e-06		-0.445		APMAP	B2M	BCL2A1	C1QA	CCL3L1/CCL3L3	CD37	CD53	CD9	CHI3L1	CLEC5A	CSF1R	CSF3R	CTSD	CTSS	FCER1G	FCGR2A	FCGR2B	GFAP	GRN	HEXB	HLA-B	HPGDS	IGF1	IGFBP5	INPP5D	IRF8	ITGAM	ITGB2	ITGB5	KLK6	LAG3	LCP2	LY86	LYN	MAFB	MSN	NAIP	NCKAP1L	PIK3CG	RUNX1	S1PR3	SERPINA3	SPI1	STAT3
Organismal Development	abnormal morphology of body cavity	3.51e-06				B2M	CD9	CLEC7A	CMKLR1	CSF1R	CTSD	FCER1G	FCGR2B	GRN	HEXA	HEXB	IGF1	IGFBP5	INPP5D	IRF8	ITGB2	LAG3	LCP2	LYN	MAN2B1	PIK3CG	RUNX1	SPI1	23
Lipid Metabolism	metabolism of phospholipid	3.63e-06		1.593	bias	FCGR2A	FCGR2B	HEXB	IGF1	INPP5D	ITGB2	LYN	PIK3CG	PLEK	SPI1	10
Small Molecule Biochemistry	metabolism of phospholipid	3.63e-06		1.593	bias	FCGR2A	FCGR2B	HEXB	IGF1	INPP5D	ITGB2	LYN	PIK3CG	PLEK	SPI1	10
Cardiovascular Disease	Infarction	3.63e-06		0.478		C1QA	CCL3L1/CCL3L3	CSF1R	CSF3R	FCER1G	HLA-B	HPGDS	IGF1	ITGAM	ITGB2	TREM2	11
Cellular Development	differentiation of bone marrow cells	3.64e-06	Increased	2.231	bias	C3AR1	FCER1G	IGF1	IRF8	LYN	MAFB	RUNX1	SPI1	TYROBP	9
Hematopoiesis	differentiation of bone marrow cells	3.64e-06	Increased	2.231	bias	C3AR1	FCER1G	IGF1	IRF8	LYN	MAFB	RUNX1	SPI1	TYROBP	9
Inflammatory Response	degranulation of granulocytes	3.9e-06	Decreased	-2	bias	FCGR2A	FCGR2B	ITGAM	ITGB2	MYO1F	5
Cellular Compromise	degranulation of granulocytes	3.9e-06	Decreased	-2	bias	FCGR2A	FCGR2B	ITGAM	ITGB2	MYO1F	5
Hematological System Development and Function	quantity of eosinophils	3.95e-06		-0.808		C3AR1	IRF8	ITGAM	ITGB2	LYN	PIK3CG	SELPLG	7
Tissue Morphology	quantity of eosinophils	3.95e-06		-0.808		C3AR1	IRF8	ITGAM	ITGB2	LYN	PIK3CG	SELPLG	7
Hypersensitivity Response	quantity of eosinophils	3.95e-06		-0.808		C3AR1	IRF8	ITGAM	ITGB2	LYN	PIK3CG	SELPLG	7
Organismal Development	abnormal morphology of abdomen	4.01e-06				B2M	CLEC7A	CSF1R	CTSD	FCER1G	FCGR2B	GRN	HEXA	HEXB	IGFBP5	INPP5D	IRF8	ITGB2	LAG3	LCP2	LYN	MAFB	MAN2B1	MYO1E	SPI1	20
Inflammatory Response	degranulation of BMMC cells	4.31e-06				CD9	FCGR2B	INPP5D	LYN	4
Cellular Compromise	degranulation of BMMC cells	4.31e-06				CD9	FCGR2B	INPP5D	LYN	4
Hypersensitivity Response	degranulation of BMMC cells	4.31e-06				CD9	FCGR2B	INPP5D	LYN	4
Cellular Compromise	cytotoxicity of leukocytes	4.38e-06	Increased	2.414	bias	B2M	FCGR2A	HLA-B	IGF1	ITGAM	ITGB2	LYN	TYROBP	8
Cell Death and Survival	cytotoxicity of leukocytes	4.38e-06	Increased	2.414	bias	B2M	FCGR2A	HLA-B	IGF1	ITGAM	ITGB2	LYN	TYROBP	8
Hematological System Development and Function	cell movement of hematopoietic progenitor cells	4.39e-06		1.698	bias	CCL3L1/CCL3L3	ITGB2	LCP1	RUNX1	SELPLG	SPI1	6
Cellular Movement	cell movement of hematopoietic progenitor cells	4.39e-06		1.698	bias	CCL3L1/CCL3L3	ITGB2	LCP1	RUNX1	SELPLG	SPI1	6
Inflammatory Response	contact dermatitis	4.45e-06				FCER1G	ITGB2	LCP2	OSMR	PIK3CG	5
Immunological Disease	contact dermatitis	4.45e-06				FCER1G	ITGB2	LCP2	OSMR	PIK3CG	5
Inflammatory Disease	contact dermatitis	4.45e-06				FCER1G	ITGB2	LCP2	OSMR	PIK3CG	5
Dermatological Diseases and Conditions	contact dermatitis	4.45e-06				FCER1G	ITGB2	LCP2	OSMR	PIK3CG	5
Cell-To-Cell Signaling and Interaction	recruitment of antigen presenting cells	4.78e-06		1.941	bias	C3AR1	CMKLR1	CSF1R	INPP5D	ITGB2	LYN	PIK3CG	7
Hematological System Development and Function	recruitment of antigen presenting cells	4.78e-06		1.941	bias	C3AR1	CMKLR1	CSF1R	INPP5D	ITGB2	LYN	PIK3CG	7
Cellular Movement	recruitment of antigen presenting cells	4.78e-06		1.941	bias	C3AR1	CMKLR1	CSF1R	INPP5D	ITGB2	LYN	PIK3CG	7
Immune Cell Trafficking	recruitment of antigen presenting cells	4.78e-06		1.941	bias	C3AR1	CMKLR1	CSF1R	INPP5D	ITGB2	LYN	PIK3CG	7
Hematological System Development and Function	development of phagocytes	4.78e-06				CD9	CSF1R	IRF8	MAFB	SPI1	STAT3	6
Cellular Development	development of phagocytes	4.78e-06				CD9	CSF1R	IRF8	MAFB	SPI1	STAT3	6
Hematopoiesis	development of phagocytes	4.78e-06				CD9	CSF1R	IRF8	MAFB	SPI1	STAT3	6
Lymphoid Tissue Structure and Development	development of phagocytes	4.78e-06				CD9	CSF1R	IRF8	MAFB	SPI1	STAT3	6
Cell-To-Cell Signaling and Interaction	signaling of macrophages	4.85e-06				CLEC7A	ITGAM	PIK3CG	3
Organismal Injury and Abnormalities	Lesion Formation	5.25e-06		1.414		C1QA	CCL3L1/CCL3L3	CTSS	FCER1G	FCGR2B	HLA-B	HPGDS	IGF1	IRF8	ITGAM	PIK3CG	RUNX1	STAT3	13
Inflammatory Response	quantity of monocytes	6.12e-06		-1.362		CSF1R	CSF3R	FCGR2B	INPP5D	ITGB2	PIK3CG	RUNX1	7
Hematological System Development and Function	quantity of monocytes	6.12e-06		-1.362		CSF1R	CSF3R	FCGR2B	INPP5D	ITGB2	PIK3CG	RUNX1	7
Tissue Morphology	quantity of monocytes	6.12e-06		-1.362		CSF1R	CSF3R	FCGR2B	INPP5D	ITGB2	PIK3CG	RUNX1	7
Cellular Development	differentiation of connective tissue cells	6.17e-06		1.382		C3AR1	CCL3L1/CCL3L3	CD9	CMKLR1	CSF1R	FCER1G	FCGR2B	GRN	IGF1	IGFBP5	INPP5D	STAT3	TF	TREM2	TYROBP	15
Cell Death and Survival	cell viability of leukocytes	6.32e-06	Increased	2.394	bias	BCL2A1	CSF1R	FCER1G	INPP5D	ITGB2	KLK6	LYN	PIK3CG	STAT3	TYROBP	10
Cell-To-Cell Signaling and Interaction	binding of fibroblast cell lines	6.47e-06		1.516	bias	FCGR2A	IGF1	ITGAM	ITGB2	SELPLG	5
Connective Tissue Development and Function	binding of fibroblast cell lines	6.47e-06		1.516	bias	FCGR2A	IGF1	ITGAM	ITGB2	SELPLG	5
Endocrine System Disorders	insulitis	6.47e-06		-0.555	bias	B2M	CCL3L1/CCL3L3	CTSS	IGF1	ITGB2	5
Gastrointestinal Disease	insulitis	6.47e-06		-0.555	bias	B2M	CCL3L1/CCL3L3	CTSS	IGF1	ITGB2	5
Inflammatory Disease	insulitis	6.47e-06		-0.555	bias	B2M	CCL3L1/CCL3L3	CTSS	IGF1	ITGB2	5
Organismal Survival	survival of organism	6.6e-06	Increased	2.096	bias	BCL2A1	CCL3L1/CCL3L3	CLEC5A	FCGR2B	IGF1	INPP5D	IRF8	ITGAM	LAG3	PIK3CG	RUNX1	S1PR3	SLC11A1	SLC14A1	SPI1	STAT3	UNC93B1	17
Cellular Compromise	cytotoxicity of cells	6.96e-06	Increased	2.412	bias	B2M	FCER1G	FCGR2A	HLA-B	IGF1	ITGAM	ITGB2	LYN	TYROBP	9
Cell Death and Survival	cytotoxicity of cells	6.96e-06	Increased	2.412	bias	B2M	FCER1G	FCGR2A	HLA-B	IGF1	ITGAM	ITGB2	LYN	TYROBP	9
Hematological System Development and Function	cell rolling of leukocytes	7.21e-06		0.534	bias	FCGR2A	ITGAM	ITGB2	LCP2	LYN	SELPLG	6
Cellular Movement	cell rolling of leukocytes	7.21e-06		0.534	bias	FCGR2A	ITGAM	ITGB2	LCP2	LYN	SELPLG	6
Immune Cell Trafficking	cell rolling of leukocytes	7.21e-06		0.534	bias	FCGR2A	ITGAM	ITGB2	LCP2	LYN	SELPLG	6
Cellular Growth and Proliferation	generation of dendritic cells	8.32e-06		1.176	bias	IRF8	LYN	SPI1	STAT3	4
Tissue Development	generation of dendritic cells	8.32e-06		1.176	bias	IRF8	LYN	SPI1	STAT3	4
Inflammatory Response	inflammation of respiratory system component	8.37e-06		0.526		C3AR1	CCL3L1/CCL3L3	CLEC7A	CMKLR1	CTSS	FCGR2A	FCGR2B	IGF1	LCP2	LYN	SPI1	STAT3	12
Cell-To-Cell Signaling and Interaction	recruitment of myeloid cells	8.42e-06	Increased	2.42	bias	C3AR1	CCL3L1/CCL3L3	CHI3L1	FCGR2A	FCGR2B	ITGAM	ITGB2	LYN	PIK3CG	9
Hematological System Development and Function	recruitment of myeloid cells	8.42e-06	Increased	2.42	bias	C3AR1	CCL3L1/CCL3L3	CHI3L1	FCGR2A	FCGR2B	ITGAM	ITGB2	LYN	PIK3CG	9
Cellular Movement	recruitment of myeloid cells	8.42e-06	Increased	2.42	bias	C3AR1	CCL3L1/CCL3L3	CHI3L1	FCGR2A	FCGR2B	ITGAM	ITGB2	LYN	PIK3CG	9
Immune Cell Trafficking	recruitment of myeloid cells	8.42e-06	Increased	2.42	bias	C3AR1	CCL3L1/CCL3L3	CHI3L1	FCGR2A	FCGR2B	ITGAM	ITGB2	LYN	PIK3CG	9
Metabolic Disease	GM2 gangliosidosis	8.45e-06				HEXA	HEXB	S1PR3	3
Neurological Disease	GM2 gangliosidosis	8.45e-06				HEXA	HEXB	S1PR3	3
Developmental Disorder	GM2 gangliosidosis	8.45e-06				HEXA	HEXB	S1PR3	3
Hereditary Disorder	GM2 gangliosidosis	8.45e-06				HEXA	HEXB	S1PR3	3
Molecular Transport	release of prostaglandin D2	8.45e-06				FCER1G	FCGR2B	Gp49a/Lilrb4	3
Lipid Metabolism	release of prostaglandin D2	8.45e-06				FCER1G	FCGR2B	Gp49a/Lilrb4	3
Small Molecule Biochemistry	release of prostaglandin D2	8.45e-06				FCER1G	FCGR2B	Gp49a/Lilrb4	3
Inflammatory Response	Dermatitis	9.59e-06		0.896	bias	C3AR1	FCER1G	FCGR2A	FCGR2B	ITGB2	KLK6	LCP2	LYN	MSN	OSMR	PIK3CG	SPI1	TLR7	13
Inflammatory Disease	Dermatitis	9.59e-06		0.896	bias	C3AR1	FCER1G	FCGR2A	FCGR2B	ITGB2	KLK6	LCP2	LYN	MSN	OSMR	PIK3CG	SPI1	TLR7	13
Dermatological Diseases and Conditions	Dermatitis	9.59e-06		0.896	bias	C3AR1	FCER1G	FCGR2A	FCGR2B	ITGB2	KLK6	LCP2	LYN	MSN	OSMR	PIK3CG	SPI1	TLR7	13
Hematological System Development and Function	migration of antigen presenting cells	9.77e-06	Increased	2.733	bias	CCL3L1/CCL3L3	CMKLR1	CSF1R	CTSZ	PIK3CG	S1PR3	TREM2	TYROBP	8
Cellular Movement	migration of antigen presenting cells	9.77e-06	Increased	2.733	bias	CCL3L1/CCL3L3	CMKLR1	CSF1R	CTSZ	PIK3CG	S1PR3	TREM2	TYROBP	8
Immune Cell Trafficking	migration of antigen presenting cells	9.77e-06	Increased	2.733	bias	CCL3L1/CCL3L3	CMKLR1	CSF1R	CTSZ	PIK3CG	S1PR3	TREM2	TYROBP	8
Inflammatory Response	abnormal morphology of macrophages	9.79e-06				CHI3L1	CMKLR1	CTSD	HEXB	MAN2B1	SPI1	6
Hematological System Development and Function	abnormal morphology of macrophages	9.79e-06				CHI3L1	CMKLR1	CTSD	HEXB	MAN2B1	SPI1	6
Cell Morphology	abnormal morphology of macrophages	9.79e-06				CHI3L1	CMKLR1	CTSD	HEXB	MAN2B1	SPI1	6
Cell Death and Survival	apoptosis of granulocytes	9.79e-06		-0.243		BCL2A1	IGF1	INPP5D	ITGAM	ITGB2	LYN	6
Free Radical Scavenging	production of superoxide	1.03e-05	Increased	2.586	bias	HVCN1	ITGAM	ITGAX	ITGB2	PIK3CG	SPI1	TYROBP	7
Hematological System Development and Function	development of myeloid cells	1.05e-05				CD9	CSF1R	CSF3R	MAFB	RUNX1	SPI1	6
Cellular Development	development of myeloid cells	1.05e-05				CD9	CSF1R	CSF3R	MAFB	RUNX1	SPI1	6
Hematopoiesis	development of myeloid cells	1.05e-05				CD9	CSF1R	CSF3R	MAFB	RUNX1	SPI1	6
Lymphoid Tissue Structure and Development	development of myeloid cells	1.05e-05				CD9	CSF1R	CSF3R	MAFB	RUNX1	SPI1	6
Hematological System Development and Function	differentiation of macrophages	1.09e-05		1.408	bias	C1QC	CSF1R	IRF8	ITGAM	SPI1	STAT3	TYROBP	7
Cellular Development	differentiation of macrophages	1.09e-05		1.408	bias	C1QC	CSF1R	IRF8	ITGAM	SPI1	STAT3	TYROBP	7
Hematopoiesis	differentiation of macrophages	1.09e-05		1.408	bias	C1QC	CSF1R	IRF8	ITGAM	SPI1	STAT3	TYROBP	7
Connective Tissue Disorders	abnormal bone density	1.16e-05		-1.86	bias	B2M	CSF1R	FCER1G	ITGB2	SPI1	TBXAS1	TREM2	TYROBP	8
Skeletal and Muscular Disorders	abnormal bone density	1.16e-05		-1.86	bias	B2M	CSF1R	FCER1G	ITGB2	SPI1	TBXAS1	TREM2	TYROBP	8
Cell Death and Survival	apoptosis of lymphoma cell lines	1.16e-05		0.633		BCL2A1	FCGR2B	IRF8	LYN	MSN	RUNX1	SPI1	STAT3	8
Hematological System Development and Function	differentiation of antigen presenting cells	1.16e-05		1.352	bias	C1QC	CSF1R	IRF8	ITGAM	LYN	SPI1	STAT3	TYROBP	8
Cellular Development	differentiation of antigen presenting cells	1.16e-05		1.352	bias	C1QC	CSF1R	IRF8	ITGAM	LYN	SPI1	STAT3	TYROBP	8
Hematopoiesis	differentiation of antigen presenting cells	1.16e-05		1.352	bias	C1QC	CSF1R	IRF8	ITGAM	LYN	SPI1	STAT3	TYROBP	8
Hematological System Development and Function	expansion of lymphocytes	1.16e-05		-1.729	bias	B2M	CD180	CTSD	FCGR2B	LAG3	LCP2	SPI1	STAT3	8
Cellular Development	expansion of lymphocytes	1.16e-05		-1.729	bias	B2M	CD180	CTSD	FCGR2B	LAG3	LCP2	SPI1	STAT3	8
Cellular Growth and Proliferation	expansion of lymphocytes	1.16e-05		-1.729	bias	B2M	CD180	CTSD	FCGR2B	LAG3	LCP2	SPI1	STAT3	8
Lymphoid Tissue Structure and Development	abnormal morphology of enlarged spleen	1.21e-05				FCGR2B	INPP5D	IRF8	ITGB2	LAG3	LCP2	LYN	SPI1	8
Organ Morphology	abnormal morphology of enlarged spleen	1.21e-05				FCGR2B	INPP5D	IRF8	ITGB2	LAG3	LCP2	LYN	SPI1	8
Organismal Development	abnormal morphology of enlarged spleen	1.21e-05				FCGR2B	INPP5D	IRF8	ITGB2	LAG3	LCP2	LYN	SPI1	8
Cell-To-Cell Signaling and Interaction	recruitment of neutrophils	1.21e-05	Increased	2.177	bias	C3AR1	CCL3L1/CCL3L3	CHI3L1	FCGR2A	FCGR2B	ITGAM	ITGB2	PIK3CG	8
Inflammatory Response	recruitment of neutrophils	1.21e-05	Increased	2.177	bias	C3AR1	CCL3L1/CCL3L3	CHI3L1	FCGR2A	FCGR2B	ITGAM	ITGB2	PIK3CG	8
Hematological System Development and Function	recruitment of neutrophils	1.21e-05	Increased	2.177	bias	C3AR1	CCL3L1/CCL3L3	CHI3L1	FCGR2A	FCGR2B	ITGAM	ITGB2	PIK3CG	8
Cellular Movement	recruitment of neutrophils	1.21e-05	Increased	2.177	bias	C3AR1	CCL3L1/CCL3L3	CHI3L1	FCGR2A	FCGR2B	ITGAM	ITGB2	PIK3CG	8
Immune Cell Trafficking	recruitment of neutrophils	1.21e-05	Increased	2.177	bias	C3AR1	CCL3L1/CCL3L3	CHI3L1	FCGR2A	FCGR2B	ITGAM	ITGB2	PIK3CG	8
Humoral Immune Response	quantity of IgG3	1.22e-05		0.128	bias	CD180	FCER1G	FCGR2B	LY86	SAMSN1	TYROBP	6
Protein Synthesis	quantity of IgG3	1.22e-05		0.128	bias	CD180	FCER1G	FCGR2B	LY86	SAMSN1	TYROBP	6
Cell-To-Cell Signaling and Interaction	phagocytosis of red blood cells	1.22e-05		1.722	bias	FCGR2A	ITGAM	ITGB2	LYN	4
Inflammatory Response	phagocytosis of red blood cells	1.22e-05		1.722	bias	FCGR2A	ITGAM	ITGB2	LYN	4
Hematological System Development and Function	phagocytosis of red blood cells	1.22e-05		1.722	bias	FCGR2A	ITGAM	ITGB2	LYN	4
Cellular Function and Maintenance	phagocytosis of red blood cells	1.22e-05		1.722	bias	FCGR2A	ITGAM	ITGB2	LYN	4
Molecular Transport	release of superoxide	1.22e-05		0.789	bias	FCER1G	FCGR2A	ITGB2	LYN	4
Free Radical Scavenging	release of superoxide	1.22e-05		0.789	bias	FCER1G	FCGR2A	ITGB2	LYN	4
Hematological System Development and Function	function of Th2 cells	1.26e-05				C3AR1	CHI3L1	GPR84	PIK3CG	SAMSN1	5
Cellular Function and Maintenance	function of Th2 cells	1.26e-05				C3AR1	CHI3L1	GPR84	PIK3CG	SAMSN1	5
Lipid Metabolism	metabolism of membrane lipid derivative	1.3e-05		1.813	bias	CD9	FCGR2A	FCGR2B	HEXA	HEXB	IGF1	INPP5D	ITGB2	LYN	PIK3CG	PLEK	SPI1	12
Small Molecule Biochemistry	metabolism of membrane lipid derivative	1.3e-05		1.813	bias	CD9	FCGR2A	FCGR2B	HEXA	HEXB	IGF1	INPP5D	ITGB2	LYN	PIK3CG	PLEK	SPI1	12
Hematological System Development and Function	function of helper T lymphocytes	1.31e-05				C3AR1	CHI3L1	FCER1G	GPR84	PIK3CG	SAMSN1	6
Cellular Function and Maintenance	function of helper T lymphocytes	1.31e-05				C3AR1	CHI3L1	FCER1G	GPR84	PIK3CG	SAMSN1	6
Cellular Function and Maintenance	function of mast cells	1.4e-05				FCER1G	FCGR2A	FCGR2B	Gp49a/Lilrb4	PIK3CG	5
Hypersensitivity Response	function of mast cells	1.4e-05				FCER1G	FCGR2A	FCGR2B	Gp49a/Lilrb4	PIK3CG	5
Hematological System Development and Function	quantity of plasma cells	1.4e-05		-0.218		FCGR2B	Gp49a/Lilrb4	IRF8	ITGB2	RASGRP3	5
Tissue Morphology	quantity of plasma cells	1.4e-05		-0.218		FCGR2B	Gp49a/Lilrb4	IRF8	ITGB2	RASGRP3	5
Humoral Immune Response	quantity of plasma cells	1.4e-05		-0.218		FCGR2B	Gp49a/Lilrb4	IRF8	ITGB2	RASGRP3	5
Hematological System Development and Function	morphology of T lymphocytes	1.42e-05				B2M	FCER1G	FCGR2B	HLA-B	INPP5D	LCP2	SPI1	7
Cell Morphology	morphology of T lymphocytes	1.42e-05				B2M	FCER1G	FCGR2B	HLA-B	INPP5D	LCP2	SPI1	7
Cell-To-Cell Signaling and Interaction	binding of tumor cell lines	1.5e-05	Increased	2.484	bias	CD68	CLEC7A	FCGR2A	IGF1	ITGAM	ITGB2	ITGB5	SELPLG	8
Cell Morphology	abnormal morphology of neuroglia	1.5e-05				GFAP	HEXA	HEXB	MAN2B1	SPI1	TYROBP	6
Nervous System Development and Function	abnormal morphology of neuroglia	1.5e-05				GFAP	HEXA	HEXB	MAN2B1	SPI1	TYROBP	6
Lipid Metabolism	synthesis of prostaglandin E2	1.57e-05	Increased	2.449	bias	FCER1G	FCGR2A	FCGR2B	HPGDS	IGF1	S1PR3	STAT3	7
Small Molecule Biochemistry	synthesis of prostaglandin E2	1.57e-05	Increased	2.449	bias	FCER1G	FCGR2A	FCGR2B	HPGDS	IGF1	S1PR3	STAT3	7
Drug Metabolism	synthesis of prostaglandin E2	1.57e-05	Increased	2.449	bias	FCER1G	FCGR2A	FCGR2B	HPGDS	IGF1	S1PR3	STAT3	7
Cancer	non-small cell lung cancer	1.61e-05				B2M	CSF1R	CSF3R	CTSD	IGF1	ITGB5	KLK6	MAFB	STAT3	9
Respiratory Disease	non-small cell lung cancer	1.61e-05				B2M	CSF1R	CSF3R	CTSD	IGF1	ITGB5	KLK6	MAFB	STAT3	9
Cell Death and Survival	cytolysis of lymphocytes	1.61e-05				FCER1G	FCGR2A	HLA-B	LCP2	PIK3CG	TYROBP	6
Metabolic Disease	lysosomal storage disease	1.61e-05				CTSD	GRN	GUSB	HEXA	HEXB	S1PR3	6
Developmental Disorder	lysosomal storage disease	1.61e-05				CTSD	GRN	GUSB	HEXA	HEXB	S1PR3	6
Hereditary Disorder	lysosomal storage disease	1.61e-05				CTSD	GRN	GUSB	HEXA	HEXB	S1PR3	6
Cell Morphology	cell spreading of leukocytes	1.71e-05		-0.277	bias	INPP5D	ITGAM	ITGB2	LYN	SAMSN1	5
Cell Morphology	cell spreading	1.72e-05		1.04	bias	CD9	FCGR2A	IGFBP5	INPP5D	ITGAM	ITGB2	LYN	SAMSN1	SERPINA3	STAT3	10
Immunological Disease	systemic lupus erythematosus	1.83e-05				C1QA	FCGR2A	FCGR2B	ITGAM	LYN	STAT3	TLR7	7
Connective Tissue Disorders	systemic lupus erythematosus	1.83e-05				C1QA	FCGR2A	FCGR2B	ITGAM	LYN	STAT3	TLR7	7
Inflammatory Disease	systemic lupus erythematosus	1.83e-05				C1QA	FCGR2A	FCGR2B	ITGAM	LYN	STAT3	TLR7	7
Skeletal and Muscular Disorders	systemic lupus erythematosus	1.83e-05				C1QA	FCGR2A	FCGR2B	ITGAM	LYN	STAT3	TLR7	7
Tissue Morphology	abnormal morphology of enlarged lymph node	1.84e-05				FCGR2B	INPP5D	IRF8	ITGB2	LYN	S1PR3	6
Lymphoid Tissue Structure and Development	abnormal morphology of enlarged lymph node	1.84e-05				FCGR2B	INPP5D	IRF8	ITGB2	LYN	S1PR3	6
Organ Morphology	abnormal morphology of enlarged lymph node	1.84e-05				FCGR2B	INPP5D	IRF8	ITGB2	LYN	S1PR3	6
Small Molecule Biochemistry	incorporation of thymidine	1.84e-05		1.765		IGF1	IGFBP5	INPP5D	PIK3CG	STAT3	TF	6
DNA Replication	Recombination	and Repair	incorporation of thymidine	1.84e-05		1.765		IGF1	IGFBP5	INPP5D	PIK3CG	STAT3	TF	6
Nucleic Acid Metabolism	incorporation of thymidine	1.84e-05		1.765		IGF1	IGFBP5	INPP5D	PIK3CG	STAT3	TF	6
Skeletal and Muscular System Development and Function	abnormal structure of bone	1.88e-05				CSF1R	FCER1G	INPP5D	ITGB2	TYROBP	5
Inflammatory Response	abnormal morphology of neutrophils	2.01e-05				FCGR2B	ITGAM	ITGB2	3
Hematological System Development and Function	abnormal morphology of neutrophils	2.01e-05				FCGR2B	ITGAM	ITGB2	3
Cell Morphology	abnormal morphology of neutrophils	2.01e-05				FCGR2B	ITGAM	ITGB2	3
Cell-To-Cell Signaling and Interaction	binding of red blood cells	2.01e-05				FCGR2A	ITGAM	ITGB2	3
Hematological System Development and Function	binding of red blood cells	2.01e-05				FCGR2A	ITGAM	ITGB2	3
Hematopoiesis	binding of red blood cells	2.01e-05				FCGR2A	ITGAM	ITGB2	3
Cell-To-Cell Signaling and Interaction	phagocytosis of blood platelets	2.01e-05				ITGAM	ITGAX	ITGB2	3
Inflammatory Response	phagocytosis of blood platelets	2.01e-05				ITGAM	ITGAX	ITGB2	3
Hematological System Development and Function	phagocytosis of blood platelets	2.01e-05				ITGAM	ITGAX	ITGB2	3
Cellular Function and Maintenance	phagocytosis of blood platelets	2.01e-05				ITGAM	ITGAX	ITGB2	3
Immunological Disease	formation of granuloma	2.03e-05				CTSS	IRF8	STAT3	TREM2	4
Organismal Injury and Abnormalities	formation of granuloma	2.03e-05				CTSS	IRF8	STAT3	TREM2	4
Cell-To-Cell Signaling and Interaction	release of 5-hydroxytryptamine	2.03e-05				CD9	FCER1G	FCGR2A	TYROBP	4
Molecular Transport	release of 5-hydroxytryptamine	2.03e-05				CD9	FCER1G	FCGR2A	TYROBP	4
Small Molecule Biochemistry	release of 5-hydroxytryptamine	2.03e-05				CD9	FCER1G	FCGR2A	TYROBP	4
Cellular Movement	cell movement of tumor cell lines	2.16e-05	Increased	3.312	bias	ARPC1B	CCL3L1/CCL3L3	CD9	CSF1R	CTSZ	GRN	IGF1	ITGB5	KLK6	LCP1	LYN	MSN	PIK3CG	S1PR3	SELPLG	STAT3	TBXAS1	17
Cell-To-Cell Signaling and Interaction	recruitment of macrophages	2.23e-05				C3AR1	CMKLR1	CSF1R	INPP5D	ITGB2	PIK3CG	6
Inflammatory Response	recruitment of macrophages	2.23e-05				C3AR1	CMKLR1	CSF1R	INPP5D	ITGB2	PIK3CG	6
Hematological System Development and Function	recruitment of macrophages	2.23e-05				C3AR1	CMKLR1	CSF1R	INPP5D	ITGB2	PIK3CG	6
Cellular Movement	recruitment of macrophages	2.23e-05				C3AR1	CMKLR1	CSF1R	INPP5D	ITGB2	PIK3CG	6
Immune Cell Trafficking	recruitment of macrophages	2.23e-05				C3AR1	CMKLR1	CSF1R	INPP5D	ITGB2	PIK3CG	6
Inflammatory Response	cell-mediated response	2.33e-05		0.927	bias	C3AR1	CLEC7A	HLA-B	INPP5D	LAG3	SLC11A1	STAT3	TLR7	8
Cell Death and Survival	apoptosis of lymphocytes	2.34e-05	Decreased	-2.657		BCL2A1	CD9	CHI3L1	FCGR2B	IGF1	INPP5D	LYN	PIK3CG	RUNX1	SPI1	STAT3	11
Hematological System Development and Function	cell viability of mast cells	2.37e-05	Increased	2	bias	BCL2A1	FCER1G	INPP5D	LYN	4
Cell Death and Survival	cell viability of mast cells	2.37e-05	Increased	2	bias	BCL2A1	FCER1G	INPP5D	LYN	4
Cell-To-Cell Signaling and Interaction	response of B lymphocytes	2.37e-05				CD180	CTSS	LYN	TLR7	4
Hematological System Development and Function	response of B lymphocytes	2.37e-05				CD180	CTSS	LYN	TLR7	4
Humoral Immune Response	response of B lymphocytes	2.37e-05				CD180	CTSS	LYN	TLR7	4
Cell-To-Cell Signaling and Interaction	binding of leukocytes	2.42e-05	Increased	2.734	bias	FCGR2A	FCGR2B	ITGAM	ITGB2	LCP2	LYN	MSN	SELPLG	8
Hematological System Development and Function	binding of leukocytes	2.42e-05	Increased	2.734	bias	FCGR2A	FCGR2B	ITGAM	ITGB2	LCP2	LYN	MSN	SELPLG	8
Hematological System Development and Function	development of hematopoietic progenitor cells	2.42e-05	Increased	2.043	bias	B2M	CSF3R	LCP2	LYN	RASGRP3	RUNX1	SPI1	TYROBP	8
Cellular Development	development of hematopoietic progenitor cells	2.42e-05	Increased	2.043	bias	B2M	CSF3R	LCP2	LYN	RASGRP3	RUNX1	SPI1	TYROBP	8
Hematopoiesis	development of hematopoietic progenitor cells	2.42e-05	Increased	2.043	bias	B2M	CSF3R	LCP2	LYN	RASGRP3	RUNX1	SPI1	TYROBP	8
Hematological System Development and Function	differentiation of hematopoietic progenitor cells	2.48e-05		1.956	bias	CSF1R	FCGR2B	IRF8	LCP2	LYN	MAFB	RUNX1	SPI1	STAT3	9
Cellular Development	differentiation of hematopoietic progenitor cells	2.48e-05		1.956	bias	CSF1R	FCGR2B	IRF8	LCP2	LYN	MAFB	RUNX1	SPI1	STAT3	9
Hematopoiesis	differentiation of hematopoietic progenitor cells	2.48e-05		1.956	bias	CSF1R	FCGR2B	IRF8	LCP2	LYN	MAFB	RUNX1	SPI1	STAT3	9
Connective Tissue Disorders	experimentally-induced arthritis	2.57e-05		-0.339		CCL3L1/CCL3L3	CD180	CTSS	FCGR2A	FCGR2B	PIK3CG	STAT3	7
Inflammatory Disease	experimentally-induced arthritis	2.57e-05		-0.339		CCL3L1/CCL3L3	CD180	CTSS	FCGR2A	FCGR2B	PIK3CG	STAT3	7
Skeletal and Muscular Disorders	experimentally-induced arthritis	2.57e-05		-0.339		CCL3L1/CCL3L3	CD180	CTSS	FCGR2A	FCGR2B	PIK3CG	STAT3	7
Cell-To-Cell Signaling and Interaction	phagocytosis of leukemia cell lines	2.75e-05		0.152	bias	FCGR2A	FCGR2B	INPP5D	SPI1	4
Inflammatory Response	phagocytosis of leukemia cell lines	2.75e-05		0.152	bias	FCGR2A	FCGR2B	INPP5D	SPI1	4
Cellular Function and Maintenance	phagocytosis of leukemia cell lines	2.75e-05		0.152	bias	FCGR2A	FCGR2B	INPP5D	SPI1	4
Cell Signaling	quantity of Ca2+	2.75e-05	Increased	2.379	bias	C3AR1	CCL3L1/CCL3L3	FCER1G	FCGR2A	IGF1	INPP5D	ITGAM	LCP2	LYN	PIK3CG	RASGRP3	S1PR3	12
Molecular Transport	quantity of Ca2+	2.75e-05	Increased	2.379	bias	C3AR1	CCL3L1/CCL3L3	FCER1G	FCGR2A	IGF1	INPP5D	ITGAM	LCP2	LYN	PIK3CG	RASGRP3	S1PR3	12
Vitamin and Mineral Metabolism	quantity of Ca2+	2.75e-05	Increased	2.379	bias	C3AR1	CCL3L1/CCL3L3	FCER1G	FCGR2A	IGF1	INPP5D	ITGAM	LCP2	LYN	PIK3CG	RASGRP3	S1PR3	12
Hematological System Development and Function	production of granulocytes	2.86e-05				INPP5D	IRF8	SPI1	3
Cellular Function and Maintenance	production of granulocytes	2.86e-05				INPP5D	IRF8	SPI1	3
Cellular Growth and Proliferation	production of granulocytes	2.86e-05				INPP5D	IRF8	SPI1	3
Hematological System Development and Function	abnormal quantity of leukocytes	2.86e-05				B2M	CSF1R	FCGR2A	IRF8	ITGAM	SPI1	6
Tissue Morphology	abnormal quantity of leukocytes	2.86e-05				B2M	CSF1R	FCGR2A	IRF8	ITGAM	SPI1	6
Hematological System Development and Function	homing of mononuclear leukocytes	3.15e-05		1.44	bias	CCL3L1/CCL3L3	LCP1	PIK3CG	RUNX1	S1PR3	SELPLG	SERPINA3	STAT3	8
Cellular Movement	homing of mononuclear leukocytes	3.15e-05		1.44	bias	CCL3L1/CCL3L3	LCP1	PIK3CG	RUNX1	S1PR3	SELPLG	SERPINA3	STAT3	8
Immune Cell Trafficking	homing of mononuclear leukocytes	3.15e-05		1.44	bias	CCL3L1/CCL3L3	LCP1	PIK3CG	RUNX1	S1PR3	SELPLG	SERPINA3	STAT3	8
Molecular Transport	quantity of phosphatidylinositol-3	4	5-triphosphate	3.17e-05		0.218	bias	FCER1G	FCGR2B	INPP5D	PIK3CG	4
Carbohydrate Metabolism	quantity of phosphatidylinositol-3	4	5-triphosphate	3.17e-05		0.218	bias	FCER1G	FCGR2B	INPP5D	PIK3CG	4
Lipid Metabolism	quantity of phosphatidylinositol-3	4	5-triphosphate	3.17e-05		0.218	bias	FCER1G	FCGR2B	INPP5D	PIK3CG	4
Small Molecule Biochemistry	quantity of phosphatidylinositol-3	4	5-triphosphate	3.17e-05		0.218	bias	FCER1G	FCGR2B	INPP5D	PIK3CG	4
Lipid Metabolism	synthesis of prostaglandin D2	3.17e-05		1.98	bias	CLEC7A	FCER1G	HPGDS	IGF1	4
Small Molecule Biochemistry	synthesis of prostaglandin D2	3.17e-05		1.98	bias	CLEC7A	FCER1G	HPGDS	IGF1	4
Cell-To-Cell Signaling and Interaction	adhesion of mononuclear leukocytes	3.24e-05	Increased	2.618	bias	CCL3L1/CCL3L3	ITGAM	ITGAX	ITGB2	LCP1	PIK3CG	SELPLG	7
Hematological System Development and Function	adhesion of mononuclear leukocytes	3.24e-05	Increased	2.618	bias	CCL3L1/CCL3L3	ITGAM	ITGAX	ITGB2	LCP1	PIK3CG	SELPLG	7
Immune Cell Trafficking	adhesion of mononuclear leukocytes	3.24e-05	Increased	2.618	bias	CCL3L1/CCL3L3	ITGAM	ITGAX	ITGB2	LCP1	PIK3CG	SELPLG	7
Tissue Development	adhesion of mononuclear leukocytes	3.24e-05	Increased	2.618	bias	CCL3L1/CCL3L3	ITGAM	ITGAX	ITGB2	LCP1	PIK3CG	SELPLG	7
Organ Development	response of liver	3.29e-05		-0.213	bias	CCL3L1/CCL3L3	FCGR2B	IGF1	ITGB2	LCP2	LYN	SPI1	STAT3	TYROBP	9
Digestive System Development and Function	response of liver	3.29e-05		-0.213	bias	CCL3L1/CCL3L3	FCGR2B	IGF1	ITGB2	LCP2	LYN	SPI1	STAT3	TYROBP	9
Hepatic System Development and Function	response of liver	3.29e-05		-0.213	bias	CCL3L1/CCL3L3	FCGR2B	IGF1	ITGB2	LCP2	LYN	SPI1	STAT3	TYROBP	9
Hematological System Development and Function	abnormal morphology of bone marrow	3.42e-05				CD68	CSF1R	INPP5D	IRF8	SPI1	TYROBP	6
Tissue Morphology	abnormal morphology of bone marrow	3.42e-05				CD68	CSF1R	INPP5D	IRF8	SPI1	TYROBP	6
Lymphoid Tissue Structure and Development	abnormal morphology of bone marrow	3.42e-05				CD68	CSF1R	INPP5D	IRF8	SPI1	TYROBP	6
Renal and Urological System Development and Function	homeostasis of urine	3.5e-05				HEXA	HEXB	MAN2B1	MYO1E	SLC14A1	5
Hematological System Development and Function	abnormal morphology of osteoclasts	3.65e-05				CD68	CSF1R	INPP5D	TYROBP	4
Tissue Morphology	abnormal morphology of osteoclasts	3.65e-05				CD68	CSF1R	INPP5D	TYROBP	4
Cell Morphology	abnormal morphology of osteoclasts	3.65e-05				CD68	CSF1R	INPP5D	TYROBP	4
Lymphoid Tissue Structure and Development	abnormal morphology of osteoclasts	3.65e-05				CD68	CSF1R	INPP5D	TYROBP	4
Tissue Development	abnormal morphology of osteoclasts	3.65e-05				CD68	CSF1R	INPP5D	TYROBP	4
Organ Morphology	abnormal morphology of osteoclasts	3.65e-05				CD68	CSF1R	INPP5D	TYROBP	4
Connective Tissue Development and Function	abnormal morphology of osteoclasts	3.65e-05				CD68	CSF1R	INPP5D	TYROBP	4
Embryonic Development	abnormal morphology of osteoclasts	3.65e-05				CD68	CSF1R	INPP5D	TYROBP	4
Organ Development	abnormal morphology of osteoclasts	3.65e-05				CD68	CSF1R	INPP5D	TYROBP	4
Organismal Development	abnormal morphology of osteoclasts	3.65e-05				CD68	CSF1R	INPP5D	TYROBP	4
Skeletal and Muscular System Development and Function	abnormal morphology of osteoclasts	3.65e-05				CD68	CSF1R	INPP5D	TYROBP	4
Hematological System Development and Function	development of dendritic cells	3.65e-05				CSF1R	IRF8	SPI1	STAT3	4
Cellular Development	development of dendritic cells	3.65e-05				CSF1R	IRF8	SPI1	STAT3	4
Hematopoiesis	development of dendritic cells	3.65e-05				CSF1R	IRF8	SPI1	STAT3	4
Lymphoid Tissue Structure and Development	development of dendritic cells	3.65e-05				CSF1R	IRF8	SPI1	STAT3	4
Hematological System Development and Function	expansion of myeloid cells	3.65e-05				LAG3	RUNX1	SPI1	STAT3	4
Cellular Development	expansion of myeloid cells	3.65e-05				LAG3	RUNX1	SPI1	STAT3	4
Cellular Growth and Proliferation	expansion of myeloid cells	3.65e-05				LAG3	RUNX1	SPI1	STAT3	4
Lymphoid Tissue Structure and Development	development of lymphatic system component	3.69e-05		0.923		B2M	CD37	CD9	CSF3R	IGF1	INPP5D	LCP2	LYN	RASGRP3	SPI1	TYROBP	11
Embryonic Development	development of lymphatic system component	3.69e-05		0.923		B2M	CD37	CD9	CSF3R	IGF1	INPP5D	LCP2	LYN	RASGRP3	SPI1	TYROBP	11
Organ Development	development of lymphatic system component	3.69e-05		0.923		B2M	CD37	CD9	CSF3R	IGF1	INPP5D	LCP2	LYN	RASGRP3	SPI1	TYROBP	11
Organismal Development	development of lymphatic system component	3.69e-05		0.923		B2M	CD37	CD9	CSF3R	IGF1	INPP5D	LCP2	LYN	RASGRP3	SPI1	TYROBP	11
Cellular Movement	extravasation of cells	3.8e-05		1.98	bias	CCL3L1/CCL3L3	Gp49a/Lilrb4	ITGAM	ITGB2	PIK3CG	5
Tissue Development	abnormal morphology of broad rib	3.97e-05				HEXA	HEXB	2
Organ Morphology	abnormal morphology of broad rib	3.97e-05				HEXA	HEXB	2
Connective Tissue Development and Function	abnormal morphology of broad rib	3.97e-05				HEXA	HEXB	2
Embryonic Development	abnormal morphology of broad rib	3.97e-05				HEXA	HEXB	2
Organ Development	abnormal morphology of broad rib	3.97e-05				HEXA	HEXB	2
Organismal Development	abnormal morphology of broad rib	3.97e-05				HEXA	HEXB	2
Skeletal and Muscular System Development and Function	abnormal morphology of broad rib	3.97e-05				HEXA	HEXB	2
Carbohydrate Metabolism	conversion of phosphatidylinositol 3	4-diphosphate	3.97e-05				FCGR2B	INPP5D	2
Lipid Metabolism	conversion of phosphatidylinositol 3	4-diphosphate	3.97e-05				FCGR2B	INPP5D	2
Small Molecule Biochemistry	conversion of phosphatidylinositol 3	4-diphosphate	3.97e-05				FCGR2B	INPP5D	2
Lipid Metabolism	hydrolysis of gangliotriaosylceramide II3-sulfate	3.97e-05				HEXA	HEXB	2
Small Molecule Biochemistry	hydrolysis of gangliotriaosylceramide II3-sulfate	3.97e-05				HEXA	HEXB	2
Lipid Metabolism	hydrolysis of lactosylceramide II3-sulfate	3.97e-05				HEXA	HEXB	2
Small Molecule Biochemistry	hydrolysis of lactosylceramide II3-sulfate	3.97e-05				HEXA	HEXB	2
Metabolic Disease	polycystic lipomembranous osteodysplasia with sclerosing leukoencephalopathy	3.97e-05				TREM2	TYROBP	2
Connective Tissue Disorders	polycystic lipomembranous osteodysplasia with sclerosing leukoencephalopathy	3.97e-05				TREM2	TYROBP	2
Skeletal and Muscular Disorders	polycystic lipomembranous osteodysplasia with sclerosing leukoencephalopathy	3.97e-05				TREM2	TYROBP	2
Developmental Disorder	polycystic lipomembranous osteodysplasia with sclerosing leukoencephalopathy	3.97e-05				TREM2	TYROBP	2
Hereditary Disorder	polycystic lipomembranous osteodysplasia with sclerosing leukoencephalopathy	3.97e-05				TREM2	TYROBP	2
Hematological System Development and Function	quantity of granulocyte progenitors	3.97e-05				INPP5D	RUNX1	2
Tissue Morphology	quantity of granulocyte progenitors	3.97e-05				INPP5D	RUNX1	2
Hematopoiesis	quantity of granulocyte progenitors	3.97e-05				INPP5D	RUNX1	2
Cell-To-Cell Signaling and Interaction	signaling of peripheral T lymphocyte	3.97e-05				ITGB2	LCP2	2
Hematological System Development and Function	signaling of peripheral T lymphocyte	3.97e-05				ITGB2	LCP2	2
Hematological System Development and Function	function of CD4+ T-lymphocytes	4.12e-05				B2M	CD84	FCER1G	INPP5D	LAG3	5
Cellular Function and Maintenance	function of CD4+ T-lymphocytes	4.12e-05				B2M	CD84	FCER1G	INPP5D	LAG3	5
Infectious Disease	quantity of virus	4.12e-05				CCL3L1/CCL3L3	HLA-B	ITGB2	STAT3	TYROBP	5
Humoral Immune Response	quantity of IgG2a	4.3e-05		0		CD180	FCER1G	FCGR2B	LYN	RASGRP3	TYROBP	6
Protein Synthesis	quantity of IgG2a	4.3e-05		0		CD180	FCER1G	FCGR2B	LYN	RASGRP3	TYROBP	6
Cell-To-Cell Signaling and Interaction	activation of macrophages	4.6e-05		1.553	bias	CHI3L1	CSF1R	FCER1G	IGF1	SLC11A1	STAT3	TYROBP	7
Inflammatory Response	activation of macrophages	4.6e-05		1.553	bias	CHI3L1	CSF1R	FCER1G	IGF1	SLC11A1	STAT3	TYROBP	7
Hematological System Development and Function	activation of macrophages	4.6e-05		1.553	bias	CHI3L1	CSF1R	FCER1G	IGF1	SLC11A1	STAT3	TYROBP	7
Immune Cell Trafficking	activation of macrophages	4.6e-05		1.553	bias	CHI3L1	CSF1R	FCER1G	IGF1	SLC11A1	STAT3	TYROBP	7
Immunological Disease	immunodeficiency	4.8e-05				B2M	C1QA	C1QB	C1QC	IGF1	ITGB2	STAT3	7
Cell Death and Survival	necrosis	4.81e-05		-1.04		APMAP	B2M	BCL2A1	C1QA	CCL3L1/CCL3L3	CD9	CHI3L1	CSF1R	CSF3R	CTSD	CTSS	FCER1G	FCGR2B	GFAP	GRN	HLA-B	IGF1	IGFBP5	INPP5D	IRF8	ITGAM	ITGB2	KLK6	LAG3	LYN	MAFB	MSN	NAIP	PIK3CG	RUNX1	S1PR3	SERPINA3	SPI1	STAT3	TF	TYROBP	36
Cell Death and Survival	cytolysis	4.83e-05		1.131		B2M	FCER1G	FCGR2A	HLA-B	ITGB2	LCP2	PIK3CG	TYROBP	8
Cellular Development	proliferation of leukemia cell lines	5e-05		0.997		FCER1G	IGF1	INPP5D	LYN	RUNX1	SPI1	STAT3	TF	8
Cellular Growth and Proliferation	proliferation of leukemia cell lines	5e-05		0.997		FCER1G	IGF1	INPP5D	LYN	RUNX1	SPI1	STAT3	TF	8
Lipid Metabolism	synthesis of lipid	5.09e-05	Increased	2.665	bias	CD9	CLEC7A	FCER1G	FCGR2A	FCGR2B	HEXB	HPGDS	IGF1	INPP5D	ITGB2	LYN	MAN2B1	PIK3CG	S1PR3	STAT3	TBXAS1	16
Small Molecule Biochemistry	synthesis of lipid	5.09e-05	Increased	2.665	bias	CD9	CLEC7A	FCER1G	FCGR2A	FCGR2B	HEXB	HPGDS	IGF1	INPP5D	ITGB2	LYN	MAN2B1	PIK3CG	S1PR3	STAT3	TBXAS1	16
Hematological System Development and Function	expansion of antigen presenting cells	5.19e-05				LAG3	LYN	RUNX1	3
Cellular Development	expansion of antigen presenting cells	5.19e-05				LAG3	LYN	RUNX1	3
Cellular Growth and Proliferation	expansion of antigen presenting cells	5.19e-05				LAG3	LYN	RUNX1	3
Cell-To-Cell Signaling and Interaction	phagocytosis of fibroblast cell lines	5.19e-05				FCGR2A	ITGAM	ITGB2	3
Inflammatory Response	phagocytosis of fibroblast cell lines	5.19e-05				FCGR2A	ITGAM	ITGB2	3
Cellular Function and Maintenance	phagocytosis of fibroblast cell lines	5.19e-05				FCGR2A	ITGAM	ITGB2	3
Immunological Disease	graft-vs-host disease	5.36e-05				C3AR1	CSF3R	Gp49a/Lilrb4	INPP5D	4
Cell Death and Survival	cell death of T lymphocytes	5.61e-05	Decreased	-2.921		BCL2A1	CD9	CHI3L1	CTSD	IGF1	KLK6	LAG3	PIK3CG	RUNX1	STAT3	10
Cell Death and Survival	apoptosis of leukemia cell lines	5.76e-05		0.271		B2M	BCL2A1	CTSD	IGF1	INPP5D	ITGAM	LYN	RUNX1	STAT3	9
Tissue Morphology	abnormal morphology of lymph node	5.91e-05				FCGR2B	HPGDS	INPP5D	IRF8	ITGB2	LYN	S1PR3	7
Lymphoid Tissue Structure and Development	abnormal morphology of lymph node	5.91e-05				FCGR2B	HPGDS	INPP5D	IRF8	ITGB2	LYN	S1PR3	7
Organ Morphology	abnormal morphology of lymph node	5.91e-05				FCGR2B	HPGDS	INPP5D	IRF8	ITGB2	LYN	S1PR3	7
Cell-To-Cell Signaling and Interaction	binding of phagocytes	5.94e-05	Increased	2.408	bias	FCGR2A	ITGAM	ITGB2	LYN	MSN	SELPLG	6
Inflammatory Response	binding of phagocytes	5.94e-05	Increased	2.408	bias	FCGR2A	ITGAM	ITGB2	LYN	MSN	SELPLG	6
Hematological System Development and Function	binding of phagocytes	5.94e-05	Increased	2.408	bias	FCGR2A	ITGAM	ITGB2	LYN	MSN	SELPLG	6
Cell Death and Survival	apoptosis of bone marrow cell lines	6.03e-05				IGF1	IRF8	PIK3CG	RUNX1	STAT3	5
Cell Cycle	cell cycle progression of leukocytes	6.03e-05				FCGR2A	FCGR2B	INPP5D	LAG3	STAT3	5
Hematological System Development and Function	proliferation of granulocytes	6.05e-05				CSF1R	LAG3	MAFB	STAT3	4
Cellular Development	proliferation of granulocytes	6.05e-05				CSF1R	LAG3	MAFB	STAT3	4
Cellular Growth and Proliferation	proliferation of granulocytes	6.05e-05				CSF1R	LAG3	MAFB	STAT3	4
Hematopoiesis	proliferation of granulocytes	6.05e-05				CSF1R	LAG3	MAFB	STAT3	4
Hematological System Development and Function	hemostasis	6.11e-05		1.342	bias	CD84	FCER1G	FCGR2A	INPP5D	LCP2	LYN	PLEK	SELPLG	8
Cellular Growth and Proliferation	colony formation	6.14e-05		1.712		CCL3L1/CCL3L3	CD9	CSF1R	CSF3R	CTSD	GRN	IGF1	INPP5D	IRF8	PIK3CG	RUNX1	SPI1	STAT3	13
Hematological System Development and Function	quantity of double-positive thymocyte	6.94e-05		1.633	bias	CTSD	ITGB2	LCP2	PIK3CG	RUNX1	SPI1	6
Tissue Morphology	quantity of double-positive thymocyte	6.94e-05		1.633	bias	CTSD	ITGB2	LCP2	PIK3CG	RUNX1	SPI1	6
Hematopoiesis	quantity of double-positive thymocyte	6.94e-05		1.633	bias	CTSD	ITGB2	LCP2	PIK3CG	RUNX1	SPI1	6
Metabolic Disease	amyloidosis	7.07e-05				B2M	CD68	CHI3L1	CTSD	CTSS	GFAP	IGF1	IGFBP5	NAIP	OSMR	SERPINA3	STAT3	TF	13
Molecular Transport	release of metal	7.43e-05		1.842	bias	CSF1R	FCER1G	FCGR2A	FCGR2B	IGF1	S1PR3	SLC11A1	TF	8
Humoral Immune Response	quantity of IgG2b	7.47e-05		0.2	bias	CD180	FCER1G	FCGR2B	LY86	LYN	5
Protein Synthesis	quantity of IgG2b	7.47e-05		0.2	bias	CD180	FCER1G	FCGR2B	LY86	LYN	5
Immunological Disease	abnormal quantity of TNF	7.61e-05				B2M	CCL3L1/CCL3L3	HEXB	TREM2	4
Molecular Transport	accumulation of phosphoinositide	7.61e-05				FCGR2A	GPR84	INPP5D	PIK3CG	4
Carbohydrate Metabolism	accumulation of phosphoinositide	7.61e-05				FCGR2A	GPR84	INPP5D	PIK3CG	4
Lipid Metabolism	accumulation of phosphoinositide	7.61e-05				FCGR2A	GPR84	INPP5D	PIK3CG	4
Small Molecule Biochemistry	accumulation of phosphoinositide	7.61e-05				FCGR2A	GPR84	INPP5D	PIK3CG	4
Cell Cycle	re-entry into S phase	7.61e-05				CSF1R	IGF1	RUNX1	TF	4
Cellular Growth and Proliferation	formation of cells	7.64e-05	Increased	2.608	bias	CCL3L1/CCL3L3	CD9	CSF1R	GRN	IGF1	IRF8	LCP1	LCP2	LYN	PIK3CG	SPI1	11
Hematological System Development and Function	differentiation of B lymphocytes	7.67e-05		1	bias	INPP5D	IRF8	LYN	NCKAP1L	RUNX1	SPI1	STAT3	TLR7	8
Cellular Development	differentiation of B lymphocytes	7.67e-05		1	bias	INPP5D	IRF8	LYN	NCKAP1L	RUNX1	SPI1	STAT3	TLR7	8
Humoral Immune Response	differentiation of B lymphocytes	7.67e-05		1	bias	INPP5D	IRF8	LYN	NCKAP1L	RUNX1	SPI1	STAT3	TLR7	8
Hematopoiesis	differentiation of B lymphocytes	7.67e-05		1	bias	INPP5D	IRF8	LYN	NCKAP1L	RUNX1	SPI1	STAT3	TLR7	8
Cellular Function and Maintenance	flux of Ca2+	7.8e-05		0.806	bias	CCL3L1/CCL3L3	CLEC7A	FCGR2A	FCGR2B	INPP5D	ITGB2	LCP2	LYN	S1PR3	9
Cell Signaling	flux of Ca2+	7.8e-05		0.806	bias	CCL3L1/CCL3L3	CLEC7A	FCGR2A	FCGR2B	INPP5D	ITGB2	LCP2	LYN	S1PR3	9
Molecular Transport	flux of Ca2+	7.8e-05		0.806	bias	CCL3L1/CCL3L3	CLEC7A	FCGR2A	FCGR2B	INPP5D	ITGB2	LCP2	LYN	S1PR3	9
Vitamin and Mineral Metabolism	flux of Ca2+	7.8e-05		0.806	bias	CCL3L1/CCL3L3	CLEC7A	FCGR2A	FCGR2B	INPP5D	ITGB2	LCP2	LYN	S1PR3	9
Lipid Metabolism	degradation of lipid	8.47e-05	Increased	2.213	bias	FCGR2B	HEXA	HEXB	INPP5D	MAN2B1	SPI1	6
Small Molecule Biochemistry	degradation of lipid	8.47e-05	Increased	2.213	bias	FCGR2B	HEXA	HEXB	INPP5D	MAN2B1	SPI1	6
Inflammatory Response	cell spreading of neutrophils	8.51e-05				ITGAM	ITGB2	LYN	3
Hematological System Development and Function	cell spreading of neutrophils	8.51e-05				ITGAM	ITGB2	LYN	3
Cell Morphology	cell spreading of neutrophils	8.51e-05				ITGAM	ITGB2	LYN	3
Carbohydrate Metabolism	degradation of phosphatidic acid	8.51e-05				FCGR2B	INPP5D	SPI1	3
Lipid Metabolism	degradation of phosphatidic acid	8.51e-05				FCGR2B	INPP5D	SPI1	3
Small Molecule Biochemistry	degradation of phosphatidic acid	8.51e-05				FCGR2B	INPP5D	SPI1	3
Hematological Disease	anemia	8.63e-05		-0.811	bias	FCER1G	FCGR2A	FCGR2B	INPP5D	LYN	RUNX1	SPI1	STAT3	TBXAS1	TF	10
Hematological System Development and Function	cell movement of antigen presenting cells	8.63e-05	Increased	3.068	bias	C3AR1	CCL3L1/CCL3L3	CMKLR1	CSF1R	CTSZ	ITGB2	PIK3CG	S1PR3	TREM2	TYROBP	10
Cellular Movement	cell movement of antigen presenting cells	8.63e-05	Increased	3.068	bias	C3AR1	CCL3L1/CCL3L3	CMKLR1	CSF1R	CTSZ	ITGB2	PIK3CG	S1PR3	TREM2	TYROBP	10
Immune Cell Trafficking	cell movement of antigen presenting cells	8.63e-05	Increased	3.068	bias	C3AR1	CCL3L1/CCL3L3	CMKLR1	CSF1R	CTSZ	ITGB2	PIK3CG	S1PR3	TREM2	TYROBP	10
Lymphoid Tissue Structure and Development	size of lymphoid organ	9.17e-05		0.152		IGF1	INPP5D	ITGB2	PIK3CG	SPI1	5
Organ Morphology	size of lymphoid organ	9.17e-05		0.152		IGF1	INPP5D	ITGB2	PIK3CG	SPI1	5
Cellular Function and Maintenance	organization of cytoplasm	9.3e-05	Increased	2.522	bias	C1QA	CD9	CSF1R	CTSS	FCGR2A	GFAP	GRN	HEXA	HEXB	IGF1	ITGAM	LCP1	LCP2	LYN	MSN	MYO1F	NCKAP1L	PLEK	S1PR3	SPI1	STAT3	TF	TREM2	23
Cellular Assembly and Organization	organization of cytoplasm	9.3e-05	Increased	2.522	bias	C1QA	CD9	CSF1R	CTSS	FCGR2A	GFAP	GRN	HEXA	HEXB	IGF1	ITGAM	LCP1	LCP2	LYN	MSN	MYO1F	NCKAP1L	PLEK	S1PR3	SPI1	STAT3	TF	TREM2	23
Molecular Transport	release of histamine	9.45e-05				B2M	FCER1G	FCGR2B	LYN	4
Small Molecule Biochemistry	release of histamine	9.45e-05				B2M	FCER1G	FCGR2B	LYN	4
Infectious Disease	Viral Infection	0.000102	Increased	2.47	bias	APBB1IP	ARPC1B	B2M	C3AR1	CCL3L1/CCL3L3	CD9	CMKLR1	CTSS	CTSZ	FCGR2B	HLA-B	IRF8	ITGAM	ITGB2	LAPTM5	LCP2	MAN2B1	MYO1F	RUNX1	SAMSN1	SELPLG	SPI1	STAT3	TLR7	TYROBP	UNC93B1	26
Inflammatory Response	antibacterial response	0.000105				FCER1G	HLA-B	IRF8	MYO1F	SLC11A1	5
Antimicrobial Response	antibacterial response	0.000105				FCER1G	HLA-B	IRF8	MYO1F	SLC11A1	5
Cellular Movement	invasion of tumor cell lines	0.000105	Increased	2.683	bias	CD9	CTSD	CTSS	CTSZ	GRN	IGF1	ITGB2	KLK6	LCP1	LYN	PIK3CG	S1PR3	STAT3	13
Hematological System Development and Function	proliferation of follicular B lymphocytes	0.000106				CD180	IRF8	TLR7	3
Cellular Development	proliferation of follicular B lymphocytes	0.000106				CD180	IRF8	TLR7	3
Cellular Growth and Proliferation	proliferation of follicular B lymphocytes	0.000106				CD180	IRF8	TLR7	3
Humoral Immune Response	proliferation of follicular B lymphocytes	0.000106				CD180	IRF8	TLR7	3
Lymphoid Tissue Structure and Development	proliferation of follicular B lymphocytes	0.000106				CD180	IRF8	TLR7	3
Cellular Growth and Proliferation	proliferation of hematopoietic cell lines	0.000111	Increased	2.018	bias	C10orf54	CLEC7A	CSF1R	CSF3R	IGF1	LYN	RUNX1	STAT3	8
Cell Death and Survival	cell death of myeloma cell lines	0.000111		-0.908		B2M	IGF1	INPP5D	IRF8	SPI1	5
Cell-To-Cell Signaling and Interaction	immune response of dendritic cells	0.000116				CD68	FCER1G	FCGR2A	Gp49a/Lilrb4	4
Inflammatory Response	immune response of dendritic cells	0.000116				CD68	FCER1G	FCGR2A	Gp49a/Lilrb4	4
Connective Tissue Development and Function	bone mineral density	0.000117		1.328	bias	CD68	CD9	CSF1R	IGF1	INPP5D	ITGB2	TYROBP	7
Skeletal and Muscular System Development and Function	bone mineral density	0.000117		1.328	bias	CD68	CD9	CSF1R	IGF1	INPP5D	ITGB2	TYROBP	7
Cell-To-Cell Signaling and Interaction	antibody response of lymphocytes	0.000119				CD180	LCP2	2
Inflammatory Response	antibody response of lymphocytes	0.000119				CD180	LCP2	2
Hematological System Development and Function	antibody response of lymphocytes	0.000119				CD180	LCP2	2
Cell-To-Cell Signaling and Interaction	binding of peripheral blood lymphocytes	0.000119				ITGB2	LCP2	2
Hematological System Development and Function	binding of peripheral blood lymphocytes	0.000119				ITGB2	LCP2	2
Cell-To-Cell Signaling and Interaction	binding of peripheral blood monocytes	0.000119				ITGAM	ITGB2	2
Inflammatory Response	binding of peripheral blood monocytes	0.000119				ITGAM	ITGB2	2
Hematological System Development and Function	binding of peripheral blood monocytes	0.000119				ITGAM	ITGB2	2
Carbohydrate Metabolism	conversion of phosphatidylinositol-3	4	5-triphosphate	0.000119				FCGR2B	INPP5D	2
Lipid Metabolism	conversion of phosphatidylinositol-3	4	5-triphosphate	0.000119				FCGR2B	INPP5D	2
Small Molecule Biochemistry	conversion of phosphatidylinositol-3	4	5-triphosphate	0.000119				FCGR2B	INPP5D	2
Carbohydrate Metabolism	degradation of phosphatidylinositol-3	4	5-triphosphate	0.000119				FCGR2B	INPP5D	2
Lipid Metabolism	degradation of phosphatidylinositol-3	4	5-triphosphate	0.000119				FCGR2B	INPP5D	2
Small Molecule Biochemistry	degradation of phosphatidylinositol-3	4	5-triphosphate	0.000119				FCGR2B	INPP5D	2
Infectious Disease	infection of lymphoma cell lines	0.000119				ITGAM	SELPLG	2
Inflammatory Response	inflammation of knee	0.000119				FCGR2A	FCGR2B	2
Cellular Movement	invasion of hepatocytes	0.000119				ITGAM	ITGAX	2
Inflammatory Response	margination of neutrophils	0.000119				ITGAM	ITGB2	2
Immune Cell Trafficking	margination of neutrophils	0.000119				ITGAM	ITGB2	2
Hematological System Development and Function	recovery of blood platelets	0.000119				IGF1	STAT3	2
Cell Death and Survival	recovery of blood platelets	0.000119				IGF1	STAT3	2
Endocrine System Disorders	Pancreatitis	0.000123		-0.555	bias	B2M	CCL3L1/CCL3L3	CTSD	CTSS	IGF1	ITGB2	6
Gastrointestinal Disease	Pancreatitis	0.000123		-0.555	bias	B2M	CCL3L1/CCL3L3	CTSD	CTSS	IGF1	ITGB2	6
Inflammatory Disease	Pancreatitis	0.000123		-0.555	bias	B2M	CCL3L1/CCL3L3	CTSD	CTSS	IGF1	ITGB2	6
Cellular Movement	cell movement of lymphatic system cells	0.000126		1.432	bias	CD9	IGF1	LCP1	LCP2	S1PR3	5
Immune Cell Trafficking	cell movement of lymphatic system cells	0.000126		1.432	bias	CD9	IGF1	LCP1	LCP2	S1PR3	5
Hematological System Development and Function	colony formation of hematopoietic progenitor cells	0.000126		0.426	bias	CCL3L1/CCL3L3	IGF1	IRF8	RUNX1	SPI1	5
Cellular Growth and Proliferation	colony formation of hematopoietic progenitor cells	0.000126		0.426	bias	CCL3L1/CCL3L3	IGF1	IRF8	RUNX1	SPI1	5
Hematopoiesis	colony formation of hematopoietic progenitor cells	0.000126		0.426	bias	CCL3L1/CCL3L3	IGF1	IRF8	RUNX1	SPI1	5
Cell-To-Cell Signaling and Interaction	phagocytosis of neutrophils	0.000128		1.951	bias	FCGR2A	ITGAM	ITGB2	SELPLG	4
Inflammatory Response	phagocytosis of neutrophils	0.000128		1.951	bias	FCGR2A	ITGAM	ITGB2	SELPLG	4
Hematological System Development and Function	phagocytosis of neutrophils	0.000128		1.951	bias	FCGR2A	ITGAM	ITGB2	SELPLG	4
Cellular Function and Maintenance	phagocytosis of neutrophils	0.000128		1.951	bias	FCGR2A	ITGAM	ITGB2	SELPLG	4
Immunological Disease	eosinophilia	0.000129		1.964	bias	CCL3L1/CCL3L3	CTSS	HLA-B	IRF8	SPI1	STAT3	6
Hematological Disease	eosinophilia	0.000129		1.964	bias	CCL3L1/CCL3L3	CTSS	HLA-B	IRF8	SPI1	STAT3	6
Inflammatory Response	quantity of blood platelets	0.000129		0.447	bias	FCGR2A	INPP5D	ITGAM	ITGB2	LYN	PLEK	6
Hematological System Development and Function	quantity of blood platelets	0.000129		0.447	bias	FCGR2A	INPP5D	ITGAM	ITGB2	LYN	PLEK	6
Tissue Morphology	quantity of blood platelets	0.000129		0.447	bias	FCGR2A	INPP5D	ITGAM	ITGB2	LYN	PLEK	6
Inflammatory Response	inflammation of lung	0.000132		-0.083	bias	CCL3L1/CCL3L3	CLEC7A	CMKLR1	CTSS	FCGR2B	IGF1	LCP2	LYN	SPI1	STAT3	10
Respiratory Disease	inflammation of lung	0.000132		-0.083	bias	CCL3L1/CCL3L3	CLEC7A	CMKLR1	CTSS	FCGR2B	IGF1	LCP2	LYN	SPI1	STAT3	10
Cellular Growth and Proliferation	colony formation of cells	0.000134		1.483		CCL3L1/CCL3L3	CD9	CSF1R	CSF3R	CTSD	GRN	IGF1	INPP5D	IRF8	RUNX1	SPI1	STAT3	12
Cellular Development	proliferation of neuroglia	0.000135		1.511	bias	CLDN11	GRN	IGF1	LYN	RUNX1	S1PR3	6
Cellular Growth and Proliferation	proliferation of neuroglia	0.000135		1.511	bias	CLDN11	GRN	IGF1	LYN	RUNX1	S1PR3	6
Nervous System Development and Function	proliferation of neuroglia	0.000135		1.511	bias	CLDN11	GRN	IGF1	LYN	RUNX1	S1PR3	6
Cell Death and Survival	cell death of B lymphocytes	0.000147		-1.024	bias	BCL2A1	FCGR2B	INPP5D	KLK6	LYN	SPI1	6
Cellular Function and Maintenance	production of cells	0.000154				CSF1R	INPP5D	IRF8	MAFB	RUNX1	SPI1	6
Cellular Growth and Proliferation	production of cells	0.000154				CSF1R	INPP5D	IRF8	MAFB	RUNX1	SPI1	6
Cardiovascular Disease	damage of cardiovascular tissue	0.000154		-1.067		HPGDS	IGF1	ITGAM	PIK3CG	4
Organismal Injury and Abnormalities	damage of cardiovascular tissue	0.000154		-1.067		HPGDS	IGF1	ITGAM	PIK3CG	4
Hematological System Development and Function	extravasation of leukocytes	0.000154		1.98	bias	CCL3L1/CCL3L3	ITGAM	ITGB2	PIK3CG	4
Cellular Movement	extravasation of leukocytes	0.000154		1.98	bias	CCL3L1/CCL3L3	ITGAM	ITGB2	PIK3CG	4
Hematological Disease	non-M3 acute myeloid leukemia	0.000154				CSF1R	INPP5D	RUNX1	SPI1	4
Cancer	non-M3 acute myeloid leukemia	0.000154				CSF1R	INPP5D	RUNX1	SPI1	4
Post-Translational Modification	phosphorylation of protein	0.000156	Increased	2.955	bias	CD9	CSF1R	FCER1G	FCGR2A	FCGR2B	IGF1	ITGAM	ITGB2	LYN	NCKAP1L	PIK3CG	SAMSN1	SPI1	TF	TYROBP	15
Skeletal and Muscular System Development and Function	osteoclastogenesis	0.000161		0.537	bias	CD9	CSF1R	INPP5D	MAFB	STAT3	5
Hematological Disease	myeloid leukemia	0.000162		-0.356		CSF1R	CSF3R	INPP5D	IRF8	LYN	RUNX1	SPI1	STAT3	8
Cancer	myeloid leukemia	0.000162		-0.356		CSF1R	CSF3R	INPP5D	IRF8	LYN	RUNX1	SPI1	STAT3	8
Cellular Movement	emigration of leukocytes	0.000169		1.98	bias	FCGR2A	ITGB2	RUNX1	SELPLG	4
Immune Cell Trafficking	emigration of leukocytes	0.000169		1.98	bias	FCGR2A	ITGB2	RUNX1	SELPLG	4
Hematological System Development and Function	maturation of myeloid cells	0.000169				IRF8	ITGAM	STAT3	TLR7	4
Cellular Development	maturation of myeloid cells	0.000169				IRF8	ITGAM	STAT3	TLR7	4
Hematopoiesis	maturation of myeloid cells	0.000169				IRF8	ITGAM	STAT3	TLR7	4
Hematological System Development and Function	differentiation of red blood cells	0.000175		0.372	bias	INPP5D	LYN	MAFB	NCKAP1L	RUNX1	SPI1	6
Cellular Development	differentiation of red blood cells	0.000175		0.372	bias	INPP5D	LYN	MAFB	NCKAP1L	RUNX1	SPI1	6
Hematopoiesis	differentiation of red blood cells	0.000175		0.372	bias	INPP5D	LYN	MAFB	NCKAP1L	RUNX1	SPI1	6
Hematological Disease	chronic myeloid leukemia	0.00018				CSF1R	IRF8	LYN	RUNX1	SPI1	5
Cancer	chronic myeloid leukemia	0.00018				CSF1R	IRF8	LYN	RUNX1	SPI1	5
Immunological Disease	lichen planus	0.00018				B2M	GRN	HLA-B	LAPTM5	LCP1	5
Inflammatory Disease	lichen planus	0.00018				B2M	GRN	HLA-B	LAPTM5	LCP1	5
Dermatological Diseases and Conditions	lichen planus	0.00018				B2M	GRN	HLA-B	LAPTM5	LCP1	5
Inflammatory Response	inflammation of liver	0.000181		-0.491	bias	CCL3L1/CCL3L3	FCGR2B	ITGB2	LCP2	LYN	SPI1	STAT3	TYROBP	8
Gastrointestinal Disease	inflammation of liver	0.000181		-0.491	bias	CCL3L1/CCL3L3	FCGR2B	ITGB2	LCP2	LYN	SPI1	STAT3	TYROBP	8
Inflammatory Disease	inflammation of liver	0.000181		-0.491	bias	CCL3L1/CCL3L3	FCGR2B	ITGB2	LCP2	LYN	SPI1	STAT3	TYROBP	8
Organ Development	inflammation of liver	0.000181		-0.491	bias	CCL3L1/CCL3L3	FCGR2B	ITGB2	LCP2	LYN	SPI1	STAT3	TYROBP	8
Digestive System Development and Function	inflammation of liver	0.000181		-0.491	bias	CCL3L1/CCL3L3	FCGR2B	ITGB2	LCP2	LYN	SPI1	STAT3	TYROBP	8
Hepatic System Development and Function	inflammation of liver	0.000181		-0.491	bias	CCL3L1/CCL3L3	FCGR2B	ITGB2	LCP2	LYN	SPI1	STAT3	TYROBP	8
Hepatic System Disease	inflammation of liver	0.000181		-0.491	bias	CCL3L1/CCL3L3	FCGR2B	ITGB2	LCP2	LYN	SPI1	STAT3	TYROBP	8
Organismal Survival	lifespan of organism	0.000182		0.816	bias	IGF1	INPP5D	ITGB2	LYN	PIK3CG	STAT3	6
Cell Death and Survival	apoptosis of tumor cell lines	0.000184		-0.785		B2M	BCL2A1	CSF1R	CTSD	FCGR2B	GRN	IGF1	IGFBP5	INPP5D	IRF8	ITGAM	LAG3	LYN	MSN	NAIP	RUNX1	S1PR3	SPI1	STAT3	TF	20
Hematological System Development and Function	extravasation of neutrophils	0.000187				ITGAM	ITGB2	PIK3CG	3
Cellular Movement	extravasation of neutrophils	0.000187				ITGAM	ITGB2	PIK3CG	3
Cell-To-Cell Signaling and Interaction	signaling of T lymphocytes	0.000187				ITGB2	LCP2	PIK3CG	3
Hematological System Development and Function	signaling of T lymphocytes	0.000187				ITGB2	LCP2	PIK3CG	3
Protein Synthesis	quantity of interleukin	0.000198		-0.865		C3AR1	CLEC7A	HEXB	INPP5D	ITGB2	STAT3	6
Tissue Morphology	morphology of hepatocytes	0.000201				GRN	HEXA	HEXB	MAN2B1	OSMR	5
Cell Morphology	morphology of hepatocytes	0.000201				GRN	HEXA	HEXB	MAN2B1	OSMR	5
Organ Morphology	morphology of hepatocytes	0.000201				GRN	HEXA	HEXB	MAN2B1	OSMR	5
Organismal Development	morphology of hepatocytes	0.000201				GRN	HEXA	HEXB	MAN2B1	OSMR	5
Digestive System Development and Function	morphology of hepatocytes	0.000201				GRN	HEXA	HEXB	MAN2B1	OSMR	5
Hepatic System Development and Function	morphology of hepatocytes	0.000201				GRN	HEXA	HEXB	MAN2B1	OSMR	5
Lipid Metabolism	synthesis of phospholipid	0.000202		0.684	bias	FCGR2A	HEXB	IGF1	INPP5D	ITGB2	LYN	PIK3CG	7
Small Molecule Biochemistry	synthesis of phospholipid	0.000202		0.684	bias	FCGR2A	HEXB	IGF1	INPP5D	ITGB2	LYN	PIK3CG	7
Tissue Morphology	size of lesion	0.000212		1.414		C1QA	CTSS	FCER1G	HLA-B	HPGDS	IGF1	ITGAM	PIK3CG	8
Organismal Injury and Abnormalities	size of lesion	0.000212		1.414		C1QA	CTSS	FCER1G	HLA-B	HPGDS	IGF1	ITGAM	PIK3CG	8
Humoral Immune Response	quantity of IgE	0.000213		1		C3AR1	CHI3L1	FCER1G	Gp49a/Lilrb4	LYN	5
Protein Synthesis	quantity of IgE	0.000213		1		C3AR1	CHI3L1	FCER1G	Gp49a/Lilrb4	LYN	5
Cell-To-Cell Signaling and Interaction	adhesion of endothelial cells	0.000214	Increased	2.395	bias	C1QA	CCL3L1/CCL3L3	ITGAM	ITGB2	PIK3CG	SELPLG	6
Tissue Development	adhesion of endothelial cells	0.000214	Increased	2.395	bias	C1QA	CCL3L1/CCL3L3	ITGAM	ITGB2	PIK3CG	SELPLG	6
Cardiovascular System Development and Function	adhesion of endothelial cells	0.000214	Increased	2.395	bias	C1QA	CCL3L1/CCL3L3	ITGAM	ITGB2	PIK3CG	SELPLG	6
Cellular Function and Maintenance	organization of cytoskeleton	0.000217	Increased	2.522	bias	C1QA	CD9	CSF1R	CTSS	FCGR2A	GFAP	GRN	IGF1	ITGAM	LCP1	LCP2	LYN	MSN	MYO1F	NCKAP1L	PLEK	S1PR3	SPI1	STAT3	TF	TREM2	21
Cellular Assembly and Organization	organization of cytoskeleton	0.000217	Increased	2.522	bias	C1QA	CD9	CSF1R	CTSS	FCGR2A	GFAP	GRN	IGF1	ITGAM	LCP1	LCP2	LYN	MSN	MYO1F	NCKAP1L	PLEK	S1PR3	SPI1	STAT3	TF	TREM2	21
Cellular Movement	arrest in movement of cells	0.000221				ITGAM	ITGB2	MAFB	3
Humoral Immune Response	quantity of IgG1	0.000223		1.342		C3AR1	CD37	FCER1G	FCGR2B	LYN	RASGRP3	6
Protein Synthesis	quantity of IgG1	0.000223		1.342		C3AR1	CD37	FCER1G	FCGR2B	LYN	RASGRP3	6
Neurological Disease	Dementia	0.00023				CD68	CHI3L1	CSF1R	CTSD	CTSS	GFAP	GRN	IGF1	NAIP	SERPINA3	STAT3	TF	12
Psychological Disorders	Dementia	0.00023				CD68	CHI3L1	CSF1R	CTSD	CTSS	GFAP	GRN	IGF1	NAIP	SERPINA3	STAT3	TF	12
Molecular Transport	release of eicosanoid	0.000232		1.701	bias	CLEC7A	FCER1G	FCGR2A	FCGR2B	Gp49a/Lilrb4	LYN	6
Lipid Metabolism	release of eicosanoid	0.000232		1.701	bias	CLEC7A	FCER1G	FCGR2A	FCGR2B	Gp49a/Lilrb4	LYN	6
Small Molecule Biochemistry	release of eicosanoid	0.000232		1.701	bias	CLEC7A	FCER1G	FCGR2A	FCGR2B	Gp49a/Lilrb4	LYN	6
Metabolic Disease	Tay-Sachs disease	0.000236				HEXA	HEXB	2
Neurological Disease	Tay-Sachs disease	0.000236				HEXA	HEXB	2
Developmental Disorder	Tay-Sachs disease	0.000236				HEXA	HEXB	2
Hereditary Disorder	Tay-Sachs disease	0.000236				HEXA	HEXB	2
Molecular Transport	accumulation of chondroitin sulfate B	0.000236				HEXA	HEXB	2
Carbohydrate Metabolism	accumulation of chondroitin sulfate B	0.000236				HEXA	HEXB	2
Small Molecule Biochemistry	accumulation of chondroitin sulfate B	0.000236				HEXA	HEXB	2
Cellular Development	arrest in growth of bone marrow cells	0.000236				CMKLR1	IRF8	2
Cellular Growth and Proliferation	arrest in growth of bone marrow cells	0.000236				CMKLR1	IRF8	2
Lymphoid Tissue Structure and Development	arrest in growth of bone marrow cells	0.000236				CMKLR1	IRF8	2
Hereditary Disorder	camptodactyly	0.000236				HEXA	HEXB	2
Hematological System Development and Function	differentiation of microglia	0.000236				ITGAM	TYROBP	2
Cellular Development	differentiation of microglia	0.000236				ITGAM	TYROBP	2
Hematopoiesis	differentiation of microglia	0.000236				ITGAM	TYROBP	2
Nervous System Development and Function	differentiation of microglia	0.000236				ITGAM	TYROBP	2
Inflammatory Response	expansion of macrophages	0.000236				LAG3	RUNX1	2
Hematological System Development and Function	expansion of macrophages	0.000236				LAG3	RUNX1	2
Cellular Development	expansion of macrophages	0.000236				LAG3	RUNX1	2
Cellular Growth and Proliferation	expansion of macrophages	0.000236				LAG3	RUNX1	2
Skeletal and Muscular Disorders	hypertrophy of myotube	0.000236				GRN	IGF1	2
Developmental Disorder	hypertrophy of myotube	0.000236				GRN	IGF1	2
Cellular Movement	invasion of pneumocytes	0.000236				ITGAM	ITGAX	2
Hematological System Development and Function	production of myeloid progenitor cells	0.000236				RUNX1	SPI1	2
Cellular Function and Maintenance	production of myeloid progenitor cells	0.000236				RUNX1	SPI1	2
Cellular Growth and Proliferation	production of myeloid progenitor cells	0.000236				RUNX1	SPI1	2
Hematopoiesis	production of myeloid progenitor cells	0.000236				RUNX1	SPI1	2
Cell Cycle	re-entry into S phase of colon cancer cell lines	0.000236				IGF1	TF	2
Cellular Movement	cell movement of neuroglia	0.000237	Increased	2.213	bias	CCL3L1/CCL3L3	CHI3L1	CLDN11	CSF1R	IGF1	5
Hematological System Development and Function	quantity of natural killer cells	0.000237		-0.651	bias	CMKLR1	INPP5D	LCP2	PIK3CG	TYROBP	5
Tissue Morphology	quantity of natural killer cells	0.000237		-0.651	bias	CMKLR1	INPP5D	LCP2	PIK3CG	TYROBP	5
Cellular Compromise	cytotoxicity of lymphocytes	0.000242		1.964	bias	B2M	FCGR2A	HLA-B	IGF1	ITGB2	TYROBP	6
Cell Death and Survival	cytotoxicity of lymphocytes	0.000242		1.964	bias	B2M	FCGR2A	HLA-B	IGF1	ITGB2	TYROBP	6
Inflammatory Response	cell movement of macrophages	0.000242	Increased	2.747	bias	C3AR1	CCL3L1/CCL3L3	CMKLR1	CSF1R	ITGB2	PIK3CG	TREM2	TYROBP	8
Hematological System Development and Function	cell movement of macrophages	0.000242	Increased	2.747	bias	C3AR1	CCL3L1/CCL3L3	CMKLR1	CSF1R	ITGB2	PIK3CG	TREM2	TYROBP	8
Cellular Movement	cell movement of macrophages	0.000242	Increased	2.747	bias	C3AR1	CCL3L1/CCL3L3	CMKLR1	CSF1R	ITGB2	PIK3CG	TREM2	TYROBP	8
Immune Cell Trafficking	cell movement of macrophages	0.000242	Increased	2.747	bias	C3AR1	CCL3L1/CCL3L3	CMKLR1	CSF1R	ITGB2	PIK3CG	TREM2	TYROBP	8
Carbohydrate Metabolism	synthesis of carbohydrate	0.000243		0.444	bias	CSF1R	FCGR2A	IGF1	INPP5D	ITGB2	LYN	MAN2B1	PIK3CG	PLEK	S1PR3	STAT3	11
Free Radical Scavenging	generation of reactive oxygen species	0.000245		1.937		FCGR2A	IGF1	ITGAM	PIK3CG	STAT3	TF	TLR7	7
Skeletal and Muscular System Development and Function	abnormal morphology of skeleton	0.000247				CSF1R	FCER1G	HEXA	HEXB	IGF1	INPP5D	ITGB2	MAN2B1	TYROBP	9
Hematological System Development and Function	homing of lymphocytes	0.000251		1.499	bias	LCP1	PIK3CG	RUNX1	S1PR3	SELPLG	STAT3	6
Cellular Movement	homing of lymphocytes	0.000251		1.499	bias	LCP1	PIK3CG	RUNX1	S1PR3	SELPLG	STAT3	6
Immune Cell Trafficking	homing of lymphocytes	0.000251		1.499	bias	LCP1	PIK3CG	RUNX1	S1PR3	SELPLG	STAT3	6
Cell-To-Cell Signaling and Interaction	adhesion of embryonic cells	0.000257		0.908	bias	CD9	ITGAM	ITGB2	KLK6	4
Tissue Development	adhesion of embryonic cells	0.000257		0.908	bias	CD9	ITGAM	ITGB2	KLK6	4
Embryonic Development	adhesion of embryonic cells	0.000257		0.908	bias	CD9	ITGAM	ITGB2	KLK6	4
Hematological System Development and Function	cell viability of granulocytes	0.000257		1.982	bias	BCL2A1	ITGB2	LYN	STAT3	4
Cell Death and Survival	cell viability of granulocytes	0.000257		1.982	bias	BCL2A1	ITGB2	LYN	STAT3	4
Hematological Disease	accelerated phase chronic myelogenous leukemia	0.000259				CSF1R	LYN	RUNX1	3
Cancer	accelerated phase chronic myelogenous leukemia	0.000259				CSF1R	LYN	RUNX1	3
Inflammatory Response	expansion of phagocytes	0.000259				LAG3	LYN	RUNX1	3
Hematological System Development and Function	expansion of phagocytes	0.000259				LAG3	LYN	RUNX1	3
Cellular Development	expansion of phagocytes	0.000259				LAG3	LYN	RUNX1	3
Cellular Growth and Proliferation	expansion of phagocytes	0.000259				LAG3	LYN	RUNX1	3
Hematopoiesis	frequency of hematopoietic progenitor cells	0.000259				LYN	RASGRP3	RUNX1	3
Cell-To-Cell Signaling and Interaction	recruitment of inflammatory leukocytes	0.000259				CCL3L1/CCL3L3	CLEC7A	TLR7	3
Hematological System Development and Function	recruitment of inflammatory leukocytes	0.000259				CCL3L1/CCL3L3	CLEC7A	TLR7	3
Cellular Movement	recruitment of inflammatory leukocytes	0.000259				CCL3L1/CCL3L3	CLEC7A	TLR7	3
Immune Cell Trafficking	recruitment of inflammatory leukocytes	0.000259				CCL3L1/CCL3L3	CLEC7A	TLR7	3
Hematological Disease	acute myeloid leukemia	0.00026				CSF1R	CSF3R	INPP5D	LYN	RUNX1	SPI1	STAT3	7
Cancer	acute myeloid leukemia	0.00026				CSF1R	CSF3R	INPP5D	LYN	RUNX1	SPI1	STAT3	7
Protein Synthesis	quantity of cytokine	0.000276		-1.423		C3AR1	CLEC7A	HEXB	IGF1	INPP5D	ITGB2	SAMSN1	STAT3	8
Humoral Immune Response	abnormal morphology of B lymphocytes	0.000278				CD84	IRF8	LYN	SPI1	4
Cell Morphology	abnormal morphology of B lymphocytes	0.000278				CD84	IRF8	LYN	SPI1	4
Cellular Movement	transmigration of cells	0.000282	Increased	2.196	bias	CCL3L1/CCL3L3	CTSS	IGF1	ITGAM	ITGAX	ITGB2	6
Carbohydrate Metabolism	quantity of carbohydrate	0.000287		0.136		C1QA	FCER1G	FCGR2B	GUSB	HEXA	HEXB	IGF1	IGFBP5	INPP5D	ITGB2	PIK3CG	STAT3	12
Hematological System Development and Function	development of thymocytes	0.000292				B2M	LCP2	RASGRP3	SPI1	TYROBP	5
Cellular Function and Maintenance	development of thymocytes	0.000292				B2M	LCP2	RASGRP3	SPI1	TYROBP	5
Cellular Development	development of thymocytes	0.000292				B2M	LCP2	RASGRP3	SPI1	TYROBP	5
Hematopoiesis	development of thymocytes	0.000292				B2M	LCP2	RASGRP3	SPI1	TYROBP	5
Lymphoid Tissue Structure and Development	development of thymocytes	0.000292				B2M	LCP2	RASGRP3	SPI1	TYROBP	5
Tissue Development	development of thymocytes	0.000292				B2M	LCP2	RASGRP3	SPI1	TYROBP	5
Cell-mediated Immune Response	development of thymocytes	0.000292				B2M	LCP2	RASGRP3	SPI1	TYROBP	5
Embryonic Development	development of thymocytes	0.000292				B2M	LCP2	RASGRP3	SPI1	TYROBP	5
Organ Development	development of thymocytes	0.000292				B2M	LCP2	RASGRP3	SPI1	TYROBP	5
Organismal Development	development of thymocytes	0.000292				B2M	LCP2	RASGRP3	SPI1	TYROBP	5
Cell-To-Cell Signaling and Interaction	binding of kidney cell lines	0.0003		1.97	bias	FCGR2A	ITGAM	ITGB2	SELPLG	4
Renal and Urological System Development and Function	binding of kidney cell lines	0.0003		1.97	bias	FCGR2A	ITGAM	ITGB2	SELPLG	4
Cell Death and Survival	cytolysis of natural killer cells	0.0003				FCER1G	FCGR2A	LCP2	TYROBP	4
Cellular Function and Maintenance	function of neuroglia	0.0003				CCL3L1/CCL3L3	GFAP	GRN	LYN	4
Cellular Function and Maintenance	function of osteoclasts	0.0003				CD68	FCER1G	INPP5D	TYROBP	4
Connective Tissue Development and Function	function of osteoclasts	0.0003				CD68	FCER1G	INPP5D	TYROBP	4
Skeletal and Muscular System Development and Function	function of osteoclasts	0.0003				CD68	FCER1G	INPP5D	TYROBP	4
Lipid Metabolism	degradation of glycolipid	0.000301				HEXA	HEXB	MAN2B1	3
Small Molecule Biochemistry	degradation of glycolipid	0.000301				HEXA	HEXB	MAN2B1	3
Hematological System Development and Function	expansion of T lymphocytes	0.000304		-0.914	bias	B2M	CTSD	LAG3	LCP2	SPI1	STAT3	6
Cellular Development	expansion of T lymphocytes	0.000304		-0.914	bias	B2M	CTSD	LAG3	LCP2	SPI1	STAT3	6
Cellular Growth and Proliferation	expansion of T lymphocytes	0.000304		-0.914	bias	B2M	CTSD	LAG3	LCP2	SPI1	STAT3	6
Inflammatory Response	chemotaxis of macrophages	0.000322	Increased	2.176	bias	C3AR1	CCL3L1/CCL3L3	CMKLR1	CSF1R	PIK3CG	5
Hematological System Development and Function	chemotaxis of macrophages	0.000322	Increased	2.176	bias	C3AR1	CCL3L1/CCL3L3	CMKLR1	CSF1R	PIK3CG	5
Cellular Movement	chemotaxis of macrophages	0.000322	Increased	2.176	bias	C3AR1	CCL3L1/CCL3L3	CMKLR1	CSF1R	PIK3CG	5
Immune Cell Trafficking	chemotaxis of macrophages	0.000322	Increased	2.176	bias	C3AR1	CCL3L1/CCL3L3	CMKLR1	CSF1R	PIK3CG	5
Hematological System Development and Function	homing of T lymphocytes	0.000322		1.24	bias	LCP1	PIK3CG	RUNX1	SELPLG	STAT3	5
Cellular Movement	homing of T lymphocytes	0.000322		1.24	bias	LCP1	PIK3CG	RUNX1	SELPLG	STAT3	5
Immune Cell Trafficking	homing of T lymphocytes	0.000322		1.24	bias	LCP1	PIK3CG	RUNX1	SELPLG	STAT3	5
Cell-mediated Immune Response	homing of T lymphocytes	0.000322		1.24	bias	LCP1	PIK3CG	RUNX1	SELPLG	STAT3	5
Hematological System Development and Function	proliferation of leukocyte cell lines	0.000331		1.352	bias	C10orf54	CLEC7A	CSF1R	CSF3R	IGF1	LYN	STAT3	7
Cellular Development	proliferation of leukocyte cell lines	0.000331		1.352	bias	C10orf54	CLEC7A	CSF1R	CSF3R	IGF1	LYN	STAT3	7
Cellular Growth and Proliferation	proliferation of leukocyte cell lines	0.000331		1.352	bias	C10orf54	CLEC7A	CSF1R	CSF3R	IGF1	LYN	STAT3	7
Carbohydrate Metabolism	accumulation of carbohydrate	0.000339		-0.567		FCGR2A	GPR84	HEXA	HEXB	INPP5D	PIK3CG	6
Inflammatory Response	quantity of plasmacytoid dendritic cells	0.000347				FCGR2B	IRF8	TYROBP	3
Hematological System Development and Function	quantity of plasmacytoid dendritic cells	0.000347				FCGR2B	IRF8	TYROBP	3
Tissue Morphology	quantity of plasmacytoid dendritic cells	0.000347				FCGR2B	IRF8	TYROBP	3
Inflammatory Response	degranulation of leukocyte cell lines	0.000348		0.577	bias	C3AR1	FCER1G	FCGR2B	LYN	4
Cellular Compromise	degranulation of leukocyte cell lines	0.000348		0.577	bias	C3AR1	FCER1G	FCGR2B	LYN	4
Cell Signaling	oscillation of Ca2+	0.000348				CD9	INPP5D	ITGAM	ITGB2	4
Vitamin and Mineral Metabolism	oscillation of Ca2+	0.000348				CD9	INPP5D	ITGAM	ITGB2	4
Small Molecule Biochemistry	oscillation of Ca2+	0.000348				CD9	INPP5D	ITGAM	ITGB2	4
Cell Death and Survival	cell death of phagocytes	0.000372		-0.972		BCL2A1	C1QA	FCER1G	INPP5D	ITGB2	NAIP	STAT3	7
Lymphoid Tissue Structure and Development	morphology of thymus gland	0.000378				IGF1	LCP2	PIK3CG	RUNX1	SPI1	STAT3	6
Organ Morphology	morphology of thymus gland	0.000378				IGF1	LCP2	PIK3CG	RUNX1	SPI1	STAT3	6
Organismal Development	morphology of thymus gland	0.000378				IGF1	LCP2	PIK3CG	RUNX1	SPI1	STAT3	6
Inflammatory Response	migration of neutrophils	0.000391	Increased	2.193	bias	CCL3L1/CCL3L3	ITGAM	ITGB2	PIK3CG	SELPLG	5
Hematological System Development and Function	migration of neutrophils	0.000391	Increased	2.193	bias	CCL3L1/CCL3L3	ITGAM	ITGB2	PIK3CG	SELPLG	5
Cellular Movement	migration of neutrophils	0.000391	Increased	2.193	bias	CCL3L1/CCL3L3	ITGAM	ITGB2	PIK3CG	SELPLG	5
Immune Cell Trafficking	migration of neutrophils	0.000391	Increased	2.193	bias	CCL3L1/CCL3L3	ITGAM	ITGB2	PIK3CG	SELPLG	5
Metabolic Disease	Sandhoff's disease	0.000392				HEXB	S1PR3	2
Neurological Disease	Sandhoff's disease	0.000392				HEXB	S1PR3	2
Developmental Disorder	Sandhoff's disease	0.000392				HEXB	S1PR3	2
Hereditary Disorder	Sandhoff's disease	0.000392				HEXB	S1PR3	2
Molecular Transport	accumulation of asialo GM2 ganglioside	0.000392				HEXA	HEXB	2
Lipid Metabolism	accumulation of asialo GM2 ganglioside	0.000392				HEXA	HEXB	2
Small Molecule Biochemistry	accumulation of asialo GM2 ganglioside	0.000392				HEXA	HEXB	2
Inflammatory Response	acute renal allograft rejection	0.000392				B2M	SERPINA3	2
Organismal Injury and Abnormalities	acute renal allograft rejection	0.000392				B2M	SERPINA3	2
Renal and Urological Disease	acute renal allograft rejection	0.000392				B2M	SERPINA3	2
Lipid Metabolism	catabolism of ganglioside	0.000392				HEXA	HEXB	2
Small Molecule Biochemistry	catabolism of ganglioside	0.000392				HEXA	HEXB	2
Cellular Development	development of lymphoid cells	0.000392				LCP2	SPI1	2
Hematopoiesis	development of lymphoid cells	0.000392				LCP2	SPI1	2
Lymphoid Tissue Structure and Development	development of lymphoid cells	0.000392				LCP2	SPI1	2
Tissue Development	development of lymphoid cells	0.000392				LCP2	SPI1	2
Embryonic Development	development of lymphoid cells	0.000392				LCP2	SPI1	2
Organ Development	development of lymphoid cells	0.000392				LCP2	SPI1	2
Organismal Development	development of lymphoid cells	0.000392				LCP2	SPI1	2
Cellular Growth and Proliferation	generation of plasmacytoid dendritic cells	0.000392				IRF8	STAT3	2
Tissue Development	generation of plasmacytoid dendritic cells	0.000392				IRF8	STAT3	2
Inflammatory Response	infiltration by neutrophils	0.000392		0.659	bias	CMKLR1	FCER1G	ITGAM	ITGB2	PIK3CG	STAT3	6
Hematological System Development and Function	infiltration by neutrophils	0.000392		0.659	bias	CMKLR1	FCER1G	ITGAM	ITGB2	PIK3CG	STAT3	6
Cellular Movement	infiltration by neutrophils	0.000392		0.659	bias	CMKLR1	FCER1G	ITGAM	ITGB2	PIK3CG	STAT3	6
Immune Cell Trafficking	infiltration by neutrophils	0.000392		0.659	bias	CMKLR1	FCER1G	ITGAM	ITGB2	PIK3CG	STAT3	6
tox Functions:
Category	Diseases or Functions Annotation	p-Value	Predicted Activation State	Activation z-score	Notes	Molecules	# Molecules
Liver Inflammation/Hepatitis	inflammation of liver	0.000181		-0.491	bias	CCL3L1/CCL3L3	FCGR2B	ITGB2	LCP2	LYN	SPI1	STAT3	TYROBP	8
Cardiac Infarction	myocardial infarction	0.000551				CCL3L1/CCL3L3	CSF1R	CSF3R	FCER1G	ITGAM	ITGB2	6
Renal Inflammation	Nephritis	0.000592		-1.46	bias	C1QA	CCL3L1/CCL3L3	FCGR2A	FCGR2B	IGF1	ITGAM	LYN	7
Renal Nephritis	Nephritis	0.000592		-1.46	bias	C1QA	CCL3L1/CCL3L3	FCGR2A	FCGR2B	IGF1	ITGAM	LYN	7
Increased Levels of Albumin	increased localization of albumin	0.000816				B2M	STAT3	2
Cardiac Damage	injury of heart tissue	0.00139				IGF1	PIK3CG	2
Renal Inflammation	lupus nephritis	0.00151				FCGR2A	FCGR2B	LYN	3
Renal Nephritis	lupus nephritis	0.00151				FCGR2A	FCGR2B	LYN	3
Renal Damage	proximal tubular toxicity	0.00158				CCL3L1/CCL3L3	CTSS	IGF1	IGFBP5	4
Renal Tubule Injury	proximal tubular toxicity	0.00158				CCL3L1/CCL3L3	CTSS	IGF1	IGFBP5	4
Cardiac Damage	injury of heart	0.00191				IGF1	PIK3CG	STAT3	3
Renal Inflammation	glomerulonephritis	0.00329				C1QA	CCL3L1/CCL3L3	FCGR2A	FCGR2B	LYN	5
Renal Nephritis	glomerulonephritis	0.00329				C1QA	CCL3L1/CCL3L3	FCGR2A	FCGR2B	LYN	5
Cardiac Inflammation	carditis	0.00483				CCL3L1/CCL3L3	ITGAM	ITGB2	3
Increased Levels of ALT	increased localization of ALT	0.00568				C1QA	ITGB2	2
Renal Destruction	destruction of renal tubule	0.00633				CD37	1
Glomerular Injury	focal segmental glomerulosclerosis type 6	0.00633				MYO1E	1
Kidney Failure	gentamicin-induced renal injury	0.00633				HEXB	1
Renal Proliferation	proliferation of mesangial cells	0.00648				FCER1G	IGF1	STAT3	3
Renal Damage	damage of kidney	0.00668		1		B2M	C1QA	FCGR2A	IGF1	4
Kidney Failure	failure of kidney	0.00918				FCER1G	FCGR2B	HEXB	ITGAM	MYO1E	5
Renal Damage	injury of kidney	0.0103				B2M	FCGR2A	IGF1	3
Renal Hydronephrosis	autoimmune hydronephrosis	0.0126				FCGR2B	1
Cardiac Hypertrophy	hypertrophy of heart cells	0.0138				CMKLR1	CTSD	IGF1	STAT3	4
Cardiac Hypertrophy	hypertrophy of cardiac muscle	0.0164				IGF1	STAT3	2
Liver Steatosis	alcoholic fatty liver disease	0.0189				STAT3	1
Renal Proliferation	contact growth inhibition of kidney cell lines	0.0189				STAT3	1
Cardiac Inflammation	endocarditis	0.0189				ITGB2	1
Renal Necrosis/Cell Death	apoptosis of tubular cells	0.0195				IGF1	MAFB	2
Renal Proliferation	proliferation of kidney cell lines	0.0203		-0.152		CSF1R	GRN	INPP5D	STAT3	4
Liver Necrosis/Cell Death	necrosis of liver	0.0219		-1.406		IGF1	IRF8	ITGB2	STAT3	TYROBP	5
Liver Inflammation/Hepatitis	chronic autoimmune hepatitis	0.0251				STAT3	1
Liver Cholestasis	lipopolysaccharide hepatocellular cholestasis	0.0251				CD68	1
Glomerular Injury	thrombosis of renal glomerulus	0.0251				C1QA	1
Renal Thrombosis	thrombosis of renal glomerulus	0.0251				C1QA	1
Liver Damage	damage of liver	0.026		-0.83		FCGR2B	IGF1	ITGB2	STAT3	4
Liver Fibrosis	proliferation of hepatic stellate cells	0.0277				IGF1	TF	2
Liver Proliferation	proliferation of hepatic stellate cells	0.0277				IGF1	TF	2
Liver Proliferation	proliferation of liver cells	0.031				C3AR1	IGF1	OSMR	TF	4
Liver Adhesion	adhesion of hepatocytes	0.0374				ITGAM	1
Liver Cholestasis	obstructive cholestasis	0.0374				CD68	1
Liver Damage	injury of liver	0.0398				FCGR2B	ITGB2	STAT3	3
Kidney Failure	acute renal failure	0.0399				HEXB	ITGAM	2
Cardiac Damage	injury of myocardium	0.0435				IGF1	1
Cardiac Degeneration	injury of myocardium	0.0435				IGF1	1
Renal Proliferation	proliferation of podocytes	0.0435				STAT3	1
Cardiac Proliferation	proliferation of cardiac fibroblasts	0.0496				IGF1	1
Cardiac Proliferation	proliferation of ventricular myocytes	0.0496				IGF1	1
Renal Necrosis/Cell Death	cell death of renal glomerulus	0.0556				C1QA	1
Renal Necrosis/Cell Death	survival of podocytes	0.0556				IGF1	1
Renal Necrosis/Cell Death	apoptosis of proximal tubule cells	0.0616				IGF1	1
Cardiac Hypertrophy	hypertrophy of myocardium	0.0616				STAT3	1
Liver Regeneration	regeneration of liver	0.0638				C3AR1	STAT3	2
Liver Cirrhosis	Cirrhosis	0.0665				B2M	CD180	TF	3
Increased Levels of Alkaline Phosphatase	increased activation of alkaline phosphatase	0.0673				IGF1	IGFBP5	2
Liver Proliferation	proliferation of oval cells	0.0793				OSMR	1
Liver Necrosis/Cell Death	apoptosis of hepatic stellate cells	0.0851				IGF1	1
Increased Levels of LDH	increased release of LDH	0.0851				ITGB2	1
Renal Inflammation	crescentic glomerulonephritis	0.0909				CCL3L1/CCL3L3	1
Renal Nephritis	crescentic glomerulonephritis	0.0909				CCL3L1/CCL3L3	1
Cardiac Inflammation	experimental autoimmune myocarditis	0.0909				CCL3L1/CCL3L3	1
Liver Hyperplasia/Hyperproliferation	hyperplasia of liver	0.0909				SPI1	1
Cardiac Proliferation	proliferation of heart cells	0.0952				IGF1	ITGB2	2
Liver Necrosis/Cell Death	focal necrosis of liver	0.0967				TYROBP	1
Renal Damage	injury of renal glomerulus	0.0967				B2M	1
Renal Necrosis/Cell Death	apoptosis of renal tubule	0.102				MAFB	1
Renal Dysplasia	dysgenesis of kidney	0.108				MAFB	1
Renal Hydronephrosis	hydronephrosis	0.109				FCGR2B	IGF1	2
Liver Cirrhosis	primary biliary cirrhosis	0.109				B2M	CD180	2
Liver Hyperplasia/Hyperproliferation	development of hepatocellular carcinoma	0.114				STAT3	1
Hepatocellular Carcinoma	development of hepatocellular carcinoma	0.114				STAT3	1
Glomerular Injury	formation of glomerular crescent	0.125				C1QA	1
Liver Damage	hepatotoxicity	0.125				HLA-B	1
Cardiac Hypertrophy	hypertrophy of ventricular myocytes	0.125				IGF1	1
Liver Fibrosis	migration of hepatic stellate cells	0.125				IGF1	1
Liver Damage	damage of liver cells	0.13				STAT3	1
Glomerular Injury	hypertrophy of renal glomerulus	0.13				LYN	1
Renal Hypertrophy	hypertrophy of renal glomerulus	0.13				LYN	1
Liver Necrosis/Cell Death	cell death of liver cells	0.132				IGF1	ITGB2	STAT3	3
Cardiac Necrosis/Cell Death	cell viability of cardiomyocytes	0.152				IGF1	1
Liver Hepatomegaly	hepatomegaly	0.158				INPP5D	1
Liver Fibrosis	fibrosis of liver	0.165				FCGR2B	STAT3	2
Heart Failure	chronic heart failure	0.168				CSF3R	1
Glomerular Injury	glomerulosclerosis	0.172				LYN	MYO1E	2
Cardiac Hypertrophy	hypertrophy of cardiomyocytes	0.172				IGF1	STAT3	2
Liver Necrosis/Cell Death	apoptosis of liver cell lines	0.179				STAT3	1
Increased Levels of Creatinine	increased quantity of creatinine	0.194				SLC14A1	1
Heart Failure	failure of heart	0.203				CSF3R	IGF1	PIK3CG	3
Renal Necrosis/Cell Death	apoptosis of kidney cell lines	0.206				BCL2A1	IGF1	LYN	3
Cardiac Output	cardiac output	0.21				IGF1	1
Renal Necrosis/Cell Death	cell death of kidney cells	0.221		-1.511		BCL2A1	IGF1	LYN	MAFB	4
Cardiac Inflammation	inflammation of heart	0.23				B2M	1
Liver Fibrosis	activation of hepatic stellate cells	0.239				IGF1	1
Liver Hyperplasia/Hyperproliferation	hepatocellular carcinoma	0.239				CSF1R	CTSD	OSMR	STAT3	4
Hepatocellular Carcinoma	hepatocellular carcinoma	0.239				CSF1R	CTSD	OSMR	STAT3	4
Liver Proliferation	proliferation of hepatocytes	0.243				IGF1	OSMR	2
Cardiac Dysfunction	dysfunction of heart	0.249				PIK3CG	1
Liver Necrosis/Cell Death	apoptosis of liver cells	0.257				IGF1	STAT3	2
Glomerular Injury	interstitial fibrosis of kidney	0.258				MYO1E	1
Kidney Failure	interstitial fibrosis of kidney	0.258				MYO1E	1
Renal Fibrosis	interstitial fibrosis of kidney	0.258				MYO1E	1
Liver Hyperplasia/Hyperproliferation	cholangiocarcinoma	0.268				STAT3	1
Cardiac Arrythmia	ventricular tachycardia	0.282				LCP2	1
Tachycardia	ventricular tachycardia	0.282				LCP2	1
Cardiac Arrythmia	arrhythmia	0.314				CHI3L1	LCP2	2
Cardiac Necrosis/Cell Death	apoptosis of cardiomyocytes	0.316				IGF1	STAT3	2
Increased Levels of Hematocrit	increased hematocrit of organism	0.433				SPI1	1
Cardiac Arrythmia	atrial fibrillation	0.444				CHI3L1	1
Cardiac Fibrosis	fibrosis of heart	0.447				STAT3	1
Cardiac Hypertrophy	hypertrophy of heart	0.48				IGF1	PIK3CG	2
Cardiac Arteriopathy	coronary artery disease	0.516				ITGAM	ITGB2	2
Liver Necrosis/Cell Death	apoptosis of hepatocytes	0.566				STAT3	1
Canonical Pathways
Ingenuity Canonical Pathways	-log(p-value)	Ratio	Molecules
Dendritic Cell Maturation	6.43	0.0427	B2M	FCGR2A	TYROBP	PIK3CG	HLA-B	FCER1G	IRF8	FCGR2B	TREM2
FcŒ≥ Receptor-mediated Phagocytosis in Macrophages and Monocytes	5.77	0.066	PLD4	ARPC1B	FCGR2A	PIK3CG	LYN	INPP5D	LCP2
Role of Pattern Recognition Receptors in Recognition of Bacteria and Viruses	5.73	0.0642	CLEC7A	PIK3CG	TLR7	C1QC	C1QA	C1QB	C3AR1
Caveolar-mediated Endocytosis Signaling	5.28	0.0706	B2M	ITGB2	ITGAM	HLA-B	ITGB5	ITGAX
Acute Myeloid Leukemia Signaling	5.11	0.0714	RUNX1	CSF3R	PIK3CG	STAT3	SPI1	CSF1R
Systemic Lupus Erythematosus Signaling	5.05	0.0312	FCGR2A	PIK3CG	HLA-B	TLR7	FCER1G	LYN	FCGR2B	INPP5D
TREM1 Signaling	4.68	0.0667	TYROBP	TLR7	STAT3	FCGR2B	ITGAX
Complement System	4.63	0.114	C1QC	C1QA	C1QB	C3AR1
Natural Killer Cell Signaling	4.57	0.0508	FCGR2A	TYROBP	PIK3CG	FCER1G	INPP5D	LCP2
GM-CSF Signaling	4.39	0.0735	RUNX1	PIK3CG	LYN	STAT3	BCL2A1
Granulocyte Adhesion and Diapedesis	4.34	0.0385	CSF3R	ITGB2	CLDN11	ITGAM	CCL3L1/CCL3L3	MSN	SELPLG
Communication between Innate and Adaptive Immune Cells	4.22	0.0446	B2M	HLA-B	TLR7	FCER1G	CCL3L1/CCL3L3
Clathrin-mediated Endocytosis Signaling	3.93	0.0354	ITGB2	IGF1	TF	ARPC1B	PIK3CG	MYO1E	ITGB5
FcŒ≥RIIB Signaling in B Lymphocytes	3.89	0.0625	PIK3CG	LYN	FCGR2B	INPP5D
CTLA4 Signaling in Cytotoxic T Lymphocytes	3.87	0.0521	B2M	PIK3CG	HLA-B	FCER1G	LCP2
Virus Entry via Endocytic Pathways	3.7	0.0495	B2M	ITGB2	PIK3CG	HLA-B	ITGB5
Paxillin Signaling	3.41	0.0427	ITGB2	ITGAM	PIK3CG	ITGB5	ITGAX
B Cell Receptor Signaling	3.39	0.0343	FCGR2A	PIK3CG	LYN	FCGR2B	BCL2A1	INPP5D
Role of NFAT in Regulation of the Immune Response	3.36	0.03	FCGR2A	PIK3CG	FCER1G	LYN	FCGR2B	LCP2
Fc Epsilon RI Signaling	3.31	0.0427	PIK3CG	FCER1G	LYN	INPP5D	LCP2
IL-8 Signaling	3.08	0.0267	PLD4	ITGB2	ITGAM	PIK3CG	ITGB5	ITGAX
Macropinocytosis Signaling	3.07	0.0519	ITGB2	PIK3CG	CSF1R	ITGB5
PI3K Signaling in B Lymphocytes	2.97	0.035	CD180	PIK3CG	LYN	FCGR2B	INPP5D
Crosstalk between Dendritic Cells and Natural Killer Cells	2.97	0.0377	TYROBP	HLA-B	TLR7	TREM2
Oncostatin M Signaling	2.93	0.0857	OSMR	STAT3	CHI3L1
Leukocyte Extravasation Signaling	2.91	0.0286	ITGB2	CLDN11	ITGAM	PIK3CG	MSN	SELPLG
Integrin Signaling	2.88	0.0288	ITGB2	ITGAM	ARPC1B	PIK3CG	ITGB5	ITGAX
Prostanoid Biosynthesis	2.86	0.133	HPGDS	TBXAS1
Allograft Rejection Signaling	2.66	0.0309	B2M	HLA-B	FCER1G
Phospholipase C Signaling	2.64	0.0226	PLD4	FCGR2A	FCER1G	LYN	FCGR2B	LCP2
MSP-RON Signaling Pathway	2.63	0.0588	ITGB2	ITGAM	PIK3CG
Cytotoxic T Lymphocyte-mediated Apoptosis of Target Cells	2.57	0.0341	B2M	HLA-B	FCER1G
IGF-1 Signaling	2.53	0.0374	IGF1	PIK3CG	IGFBP5	STAT3
iCOS-iCOSL Signaling in T Helper Cells	2.49	0.0317	PIK3CG	FCER1G	INPP5D	LCP2
Acute Phase Response Signaling	2.47	0.0276	TF	PIK3CG	SERPINA3	OSMR	STAT3
Agranulocyte Adhesion and Diapedesis	2.47	0.026	ITGB2	CLDN11	CCL3L1/CCL3L3	MSN	SELPLG
Chondroitin Sulfate Degradation (Metazoa)	2.46	0.087	HEXB	HEXA
OX40 Signaling Pathway	2.41	0.0309	B2M	HLA-B	FCER1G
Dermatan Sulfate Degradation (Metazoa)	2.4	0.087	HEXB	HEXA
Lipid Antigen Presentation by CD1	2.35	0.0667	B2M	FCER1G
CD28 Signaling in T Helper Cells	2.32	0.0294	ARPC1B	PIK3CG	FCER1G	LCP2
IL-10 Signaling	2.09	0.0385	FCGR2A	STAT3	FCGR2B
Cdc42 Signaling	2.09	0.0215	B2M	ARPC1B	HLA-B	FCER1G
Growth Hormone Signaling	2.07	0.0385	IGF1	PIK3CG	STAT3
IL-3 Signaling	2.04	0.04	PIK3CG	STAT3	INPP5D
FLT3 Signaling in Hematopoietic Progenitor Cells	1.99	0.038	PIK3CG	STAT3	INPP5D
NF-Œ∫B Activation by Viruses	1.97	0.0361	ITGB2	PIK3CG	ITGB5
Role of JAK family kinases in IL-6-type Cytokine Signaling	1.97	0.0714	OSMR	STAT3
HER-2 Signaling in Breast Cancer	1.94	0.0366	ITGB2	PIK3CG	ITGB5
Ceramide Signaling	1.92	0.033	S1PR3	CTSD	PIK3CG
PDGF Signaling	1.89	0.0349	PIK3CG	STAT3	INPP5D
Tec Kinase Signaling	1.88	0.0217	PIK3CG	FCER1G	LYN	STAT3
Antigen Presentation Pathway	1.87	0.0476	B2M	HLA-B
Reelin Signaling in Neurons	1.86	0.0353	ITGB2	PIK3CG	LYN
IL-9 Signaling	1.76	0.05	PIK3CG	STAT3
Autoimmune Thyroid Disease Signaling	1.76	0.0323	HLA-B	FCER1G
Thyroid Hormone Biosynthesis	1.72	0.143	CTSD
Graft-versus-Host Disease Signaling	1.66	0.0392	HLA-B	FCER1G
Neuroprotective Role of THOP1 in Alzheimer's Disease	1.66	0.0364	HLA-B	SERPINA3
Amyotrophic Lateral Sclerosis Signaling	1.66	0.0238	IGF1	PIK3CG	NAIP
Docosahexaenoic Acid (DHA) Signaling	1.64	0.04	PIK3CG	BCL2A1
Pancreatic Adenocarcinoma Signaling	1.54	0.0234	PLD4	PIK3CG	STAT3
PKCŒ∏ Signaling in T Lymphocytes	1.53	0.0208	PIK3CG	FCER1G	LCP2
Role of Tissue Factor in Cancer	1.53	0.0231	PIK3CG	LYN	ITGB5
IL-12 Signaling and Production in Macrophages	1.46	0.0191	PIK3CG	IRF8	SPI1
RhoA Signaling	1.46	0.0244	IGF1	ARPC1B	MSN
CNTF Signaling	1.43	0.0351	PIK3CG	STAT3
Actin Cytoskeleton Signaling	1.39	0.0165	ARPC1B	PIK3CG	NCKAP1L	MSN
Role of Osteoblasts	Osteoclasts and Chondrocytes in Rheumatoid Arthritis	1.35	0.016	IGF1	PIK3CG	NAIP	CSF1R
Thrombopoietin Signaling	1.35	0.0312	PIK3CG	STAT3
Myc Mediated Apoptosis Signaling	1.31	0.0317	IGF1	PIK3CG
Glioma Invasiveness Signaling	1.31	0.0303	PIK3CG	ITGB5
ErbB2-ErbB3 Signaling	1.31	0.0317	PIK3CG	STAT3
EGF Signaling	1.31	0.0312	PIK3CG	STAT3
Signaling by Rho Family GTPases	1.28	0.0152	ARPC1B	PIK3CG	GFAP	MSN
IL-15 Signaling	1.27	0.0278	PIK3CG	STAT3
IL-17A Signaling in Airway Cells	1.27	0.0263	PIK3CG	STAT3
Role of JAK1 and JAK3 in Œ≥c Cytokine Signaling	1.27	0.0294	PIK3CG	STAT3
Eicosanoid Signaling	1.26	0.0233	HPGDS	TBXAS1
T Helper Cell Differentiation	1.24	0.0278	FCER1G	STAT3
CD40 Signaling	1.23	0.0282	PIK3CG	STAT3
Estrogen-Dependent Breast Cancer Signaling	1.23	0.0274	IGF1	PIK3CG
JAK/Stat Signaling	1.17	0.0282	PIK3CG	STAT3
Purine Nucleotides De Novo Biosynthesis II	1.17	0.0238	ADSSL1
IL-4 Signaling	1.16	0.025	PIK3CG	INPP5D
Leptin Signaling in Obesity	1.13	0.0235	PIK3CG	STAT3
Prolactin Signaling	1.12	0.0238	PIK3CG	STAT3
Choline Biosynthesis III	1.1	0.0455	PLD4
NF-Œ∫B Signaling	1.1	0.0166	PIK3CG	TLR7	FCER1G
VDR/RXR Activation	1.09	0.0227	KLK6	IGFBP5
Altered T Cell and B Cell Signaling in Rheumatoid Arthritis	1.07	0.02	TLR7	FCER1G
Production of Nitric Oxide and Reactive Oxygen Species in Macrophages	1.05	0.0142	PIK3CG	IRF8	SPI1
Ephrin Receptor Signaling	1.04	0.0143	ARPC1B	PIK3CG	STAT3
ILK Signaling	1.02	0.0146	ITGB2	PIK3CG	ITGB5
Apoptosis Signaling	1.01	0.02	BCL2A1	NAIP
FGF Signaling	0.995	0.0213	PIK3CG	STAT3
Superpathway of Inositol Phosphate Compounds	0.991	0.0128	PLD4	PIK3CG	INPP5D
SAPK/JNK Signaling	0.978	0.019	PIK3CG	FCER1G
D-myo-inositol (1	4	5)-trisphosphate Degradation	0.966	0.0435	INPP5D
1D-myo-inositol Hexakisphosphate Biosynthesis II (Mammalian)	0.944	0.0357	INPP5D
D-myo-inositol (1	3	4)-trisphosphate Biosynthesis	0.944	0.04	INPP5D
Glioma Signaling	0.938	0.0177	IGF1	PIK3CG
T Cell Receptor Signaling	0.93	0.0183	PIK3CG	LCP2
Mouse Embryonic Stem Cell Pluripotency	0.915	0.0202	PIK3CG	STAT3
HGF Signaling	0.9	0.018	PIK3CG	STAT3
Type I Diabetes Mellitus Signaling	0.9	0.0165	HLA-B	FCER1G
Role of JAK1	JAK2 and TYK2 in Interferon Signaling	0.884	0.0357	STAT3
Glutathione-mediated Detoxification	0.884	0.0227	HPGDS
fMLP Signaling in Neutrophils	0.865	0.0152	ARPC1B	PIK3CG
Rac Signaling	0.865	0.0156	ARPC1B	PIK3CG
Sphingosine-1-phosphate Signaling	0.858	0.0163	S1PR3	PIK3CG
Huntington's Disease Signaling	0.851	0.0119	CTSD	IGF1	PIK3CG
IL-22 Signaling	0.849	0.04	STAT3
Superpathway of D-myo-inositol (1	4	5)-trisphosphate Metabolism	0.849	0.0303	INPP5D
Renin-Angiotensin Signaling	0.845	0.0159	PIK3CG	STAT3
Role of NANOG in Mammalian Embryonic Stem Cell Pluripotency	0.819	0.0168	PIK3CG	STAT3
Atherosclerosis Signaling	0.819	0.0144	ITGB2	SELPLG
14-3-3-mediated Signaling	0.807	0.0165	PIK3CG	GFAP
D-myo-inositol (1	4	5)-Trisphosphate Biosynthesis	0.802	0.025	PLD4
p70S6K Signaling	0.795	0.0152	PIK3CG	LYN
IL-6 Signaling	0.795	0.0161	PIK3CG	STAT3
TNFR2 Signaling	0.788	0.0294	NAIP
GŒ±i Signaling	0.783	0.0148	S1PR3	STAT3
PTEN Signaling	0.783	0.0145	PIK3CG	INPP5D
Hematopoiesis from Pluripotent Stem Cells	0.774	0.0159	FCER1G
PI3K/AKT Signaling	0.771	0.0132	PIK3CG	INPP5D
Role of p14/p19ARF in Tumor Suppression	0.76	0.0286	PIK3CG
Colorectal Cancer Metastasis Signaling	0.752	0.0112	PIK3CG	TLR7	STAT3
Role of JAK2 in Hormone-like Cytokine Signaling	0.747	0.027	STAT3
TWEAK Signaling	0.735	0.0256	NAIP
Insulin Receptor Signaling	0.722	0.0134	PIK3CG	INPP5D
Aryl Hydrocarbon Receptor Signaling	0.711	0.0117	CTSD	ALDH1L2
Human Embryonic Stem Cell Pluripotency	0.701	0.0123	S1PR3	PIK3CG
G-Protein Coupled Receptor Signaling	0.7	0.0109	S1PR3	PIK3CG	STAT3
Synaptic Long Term Depression	0.691	0.0123	IGF1	LYN
Hepatic Fibrosis / Hepatic Stellate Cell Activation	0.691	0.0129	IGF1	IGFBP5
Role of IL-17F in Allergic Inflammatory Airway Diseases	0.658	0.0208	IGF1
GŒ±q Signaling	0.658	0.0117	PLD4	PIK3CG
Transcriptional Regulatory Network in Embryonic Stem Cells	0.649	0.0233	STAT3
Glioblastoma Multiforme Signaling	0.635	0.0119	IGF1	PIK3CG
CXCR4 Signaling	0.631	0.0115	PIK3CG	LYN
Melanoma Signaling	0.63	0.02	PIK3CG
Nur77 Signaling in T Lymphocytes	0.63	0.0156	FCER1G
TNFR1 Signaling	0.596	0.0185	NAIP
Role of Macrophages	Fibroblasts and Endothelial Cells in Rheumatoid Arthritis	0.583	0.00877	PIK3CG	TLR7	STAT3
Ephrin A Signaling	0.58	0.0185	PIK3CG
Role of PI3K/AKT Signaling in the Pathogenesis of Influenza	0.565	0.0132	PIK3CG
UVB-Induced MAPK Signaling	0.565	0.0172	PIK3CG
Endothelin-1 Signaling	0.559	0.0104	PLD4	PIK3CG
Calcium-induced T Lymphocyte Apoptosis	0.557	0.0141	FCER1G
Endometrial Cancer Signaling	0.55	0.0167	PIK3CG
Role of IL-17A in Arthritis	0.55	0.0156	PIK3CG
Toll-like Receptor Signaling	0.55	0.0156	TLR7
IL-2 Signaling	0.55	0.0164	PIK3CG
RhoGDI Signaling	0.544	0.0099	ARPC1B	MSN
Lymphotoxin Œ≤ Receptor Signaling	0.543	0.0161	PIK3CG
Death Receptor Signaling	0.543	0.0147	NAIP
Role of NFAT in Cardiac Hypertrophy	0.541	0.00957	IGF1	PIK3CG
Phospholipases	0.536	0.0147	PLD4
Induction of Apoptosis by HIV1	0.53	0.0149	NAIP
Actin Nucleation by ARP-WASP Complex	0.53	0.0149	ARPC1B
mTOR Signaling	0.527	0.00939	PLD4	PIK3CG
ErbB4 Signaling	0.517	0.0145	PIK3CG
CCR5 Signaling in Macrophages	0.511	0.0103	FCER1G
Regulation of the Epithelial-Mesenchymal Transition Pathway	0.507	0.0102	PIK3CG	STAT3
ERK/MAPK Signaling	0.507	0.00948	PIK3CG	STAT3
Antiproliferative Role of Somatostatin Receptor 2	0.487	0.0139	PIK3CG
Remodeling of Epithelial Adherens Junctions	0.487	0.0143	ARPC1B
Angiopoietin Signaling	0.47	0.0133	PIK3CG
Non-Small Cell Lung Cancer Signaling	0.47	0.012	PIK3CG
Chemokine Signaling	0.47	0.0133	PIK3CG
Erythropoietin Signaling	0.465	0.0127	PIK3CG
IL-17 Signaling	0.465	0.0133	PIK3CG
GDNF Family Ligand-Receptor Interactions	0.465	0.0132	PIK3CG
Agrin Interactions at Neuromuscular Junction	0.459	0.0143	ITGB2
Neurotrophin/TRK Signaling	0.459	0.0132	PIK3CG
Renal Cell Carcinoma Signaling	0.454	0.0127	PIK3CG
Small Cell Lung Cancer Signaling	0.449	0.0106	PIK3CG
PEDF Signaling	0.444	0.0127	PIK3CG
LPS-stimulated MAPK Signaling	0.434	0.012	PIK3CG
VEGF Family Ligand-Receptor Interactions	0.434	0.0114	PIK3CG
STAT3 Pathway	0.434	0.0125	STAT3
cAMP-mediated signaling	0.425	0.00885	S1PR3	STAT3
Cardiac Hypertrophy Signaling	0.417	0.008	IGF1	PIK3CG
Prostate Cancer Signaling	0.407	0.00971	PIK3CG
Regulation of Actin-based Motility by Rho	0.403	0.0109	ARPC1B
TR/RXR Activation	0.395	0.00917	PIK3CG
Melanocyte Development and Pigmentation Signaling	0.395	0.0105	PIK3CG
ErbB Signaling	0.387	0.0111	PIK3CG
G Beta Gamma Signaling	0.383	0.00826	PIK3CG
RANK Signaling in Osteoclasts	0.383	0.0103	PIK3CG
FAK Signaling	0.379	0.00943	PIK3CG
UVA-Induced MAPK Signaling	0.379	0.0102	PIK3CG
PAK Signaling	0.371	0.00909	PIK3CG
VEGF Signaling	0.371	0.00917	PIK3CG
Xenobiotic Metabolism Signaling	0.357	0.00694	ALDH1L2	PIK3CG
p53 Signaling	0.357	0.00885	PIK3CG
HMGB1 Signaling	0.357	0.00917	PIK3CG
Chronic Myeloid Leukemia Signaling	0.353	0.00943	PIK3CG
Telomerase Signaling	0.35	0.00943	PIK3CG
Antioxidant Action of Vitamin C	0.35	0.00901	PLD4
Nitric Oxide Signaling in the Cardiovascular System	0.346	0.008	PIK3CG
Neuropathic Pain Signaling In Dorsal Horn Neurons	0.343	0.00917	PIK3CG
Protein Ubiquitination Pathway	0.342	0.00741	B2M	HLA-B
Glucocorticoid Receptor Signaling	0.34	0.00669	PIK3CG	STAT3
HIF1Œ± Signaling	0.333	0.00893	PIK3CG
Axonal Guidance Signaling	0.316	0.00616	IGF1	ARPC1B	PIK3CG
NGF Signaling	0.312	0.0082	PIK3CG
CCR3 Signaling in Eosinophils	0.306	0.00746	PIK3CG
LXR/RXR Activation	0.303	0.00719	TF
Hereditary Breast Cancer Signaling	0.3	0.00746	PIK3CG
Type II Diabetes Mellitus Signaling	0.292	0.00585	PIK3CG
P2Y Purigenic Receptor Signaling Pathway	0.289	0.00694	PIK3CG
GŒ±12/13 Signaling	0.287	0.00787	PIK3CG
eNOS Signaling	0.269	0.00645	PIK3CG
AMPK Signaling	0.262	0.00552	PIK3CG
Ovarian Cancer Signaling	0.253	0.00658	PIK3CG
Relaxin Signaling	0.251	0.0061	PIK3CG
D-myo-inositol-5-phosphate Metabolism	0.251	0.00617	PLD4
3-phosphoinositide Degradation	0.251	0.00617	INPP5D
Regulation of eIF4 and p70S6K Signaling	0.247	0.00571	PIK3CG
Epithelial Adherens Junction Signaling	0.234	0.00649	ARPC1B
3-phosphoinositide Biosynthesis	0.231	0.00552	PIK3CG
Aldosterone Signaling in Epithelial Cells	0.221	0.00592	PIK3CG
Tight Junction Signaling	0.219	0.00599	CLDN11
Gap Junction Signaling	0.219	0.00552	PIK3CG
Germ Cell-Sertoli Cell Junction Signaling	0.214	0.00592	PIK3CG
Upstream Regulators
Upstream Regulator	Fold Change	Molecule Type	Predicted Activation State	Activation z-score	Notes	p-value of overlap	Target molecules in dataset	Mechanistic Network
lipopolysaccharide		chemical drug	Activated	3.659	bias	3.91e-24	ARPC1B	BCL2A1	C3AR1	CCL3L1/CCL3L3	CD37	CD53	CD9	CHI3L1	CLEC5A	CLEC7A	CSF1R	CSF3R	FCER1G	FCGR2B	GFAP	Gp49a/Lilrb4	GPR84	HLA-B	IGF1	IGFBP5	INPP5D	IRF8	ITGAM	ITGAX	ITGB2	ITGB5	LCP2	LYN	MAFB	MSN	OSMR	PIK3CG	PLD4	PLEK	S1PR3	SAMSN1	SERPINA3	SLC11A1	SPI1	STAT3	TF	TLR7	TREM2
IFNG		cytokine	Activated	2.654	bias	8.15e-18	B2M	BCL2A1	C1QA	C1QB	C1QC	CCL3L1/CCL3L3	CLEC5A	CSF1R	CTSD	CTSS	CTSZ	FCER1G	FCGR2A	FCGR2B	GUSB	HLA-B	IGF1	IRF8	ITGAM	ITGB2	LAG3	LCP2	LYN	PLEK	S1PR3	SLC11A1	SLC14A1	SPI1	STAT3	TBXAS1	TLR7	TREM2	TYROBP	Wfdc17	C5	Creb	EP300	IFNG	Ifn	KAT2B	RELA	STAT1	STAT3
TNF		cytokine	Activated	3.073	bias	3.85e-17	B2M	BCL2A1	CCL3L1/CCL3L3	CHI3L1	CLDN11	CLEC5A	CSF1R	CST7	CTSS	CTSZ	FCER1G	FCGR2B	GFAP	GPR84	GRN	GUSB	HEXA	HEXB	HLA-B	HPGDS	IGF1	IGFBP5	INPP5D	IRF8	ITGAM	ITGB2	LYN	NAIP	OSMR	S1PR3	SELPLG	SERPINA3	SLC14A1	TBXAS1	TF	TLR7	TREM2	Creb	EP300	IFNG	KAT2B	NFkB (complex)	REL
E. coli B4 lipopolysaccharide		chemical toxicant	Activated	3.302	bias	8.17e-14	C1QB	CCL3L1/CCL3L3	Cd52	CLEC5A	CYTH4	FCER1G	Gp49a/Lilrb4	GPNMB	HLA-B	INPP5D	LCP1	LCP2	Oasl2	PLEK	SAMSN1	SLC14A1	TF
DYSF		other				2.95e-13	B2M	C1QB	Cd52	CD53	CD68	CTSS	FCGR2B	Gp49a/Lilrb4	HLA-B	LCP1	SERPINA3
SPI1	1.777	transcription regulator	Activated	2.761	bias	1.02e-12	C1QC	CD180	CD68	CHI3L1	CSF1R	CSF3R	CTSS	FCER1G	FCGR2B	ITGAM	ITGB2	PIK3CG	SPI1	JUN	RELA	SPI1
IL10		cytokine		0.811		2e-12	BCL2A1	CCL3L1/CCL3L3	CD68	CLEC7A	CSF1R	CTSS	CTSZ	FCER1G	FCGR2A	FCGR2B	INPP5D	LAG3	PIK3CG	SELPLG	STAT3	TLR7	EP300	IFNG	IL10
IL1B		cytokine		0.833	bias	2.63e-11	BCL2A1	CCL3L1/CCL3L3	CHI3L1	CTSS	CTSZ	FCGR2B	GRN	GUSB	HEXA	HEXB	HLA-B	HPGDS	IGF1	IGFBP5	ITGAM	LCP1	OSMR	PLXDC2	SERPINA3	SLC14A1	TLR7	TREM2	Creb	EP300	IL1B	RELA	STAT3	TNF
Immunoglobulin		complex		-0.724		3.27e-11	BCL2A1	C3AR1	CSF1R	CTSZ	FCER1G	FCGR2A	GFAP	ITGAX	LAG3	NAIP	SLC11A1	SPI1	TLR7
inosine		chemical - endogenous mammalian		1.913	bias	1.3e-10	ARPC1B	C1QA	C1QB	C1QC	CCL3L1/CCL3L3	CD68	GFAP	LCP1
IL6		cytokine	Activated	2.534	bias	3.22e-10	CCL3L1/CCL3L3	CD53	CD68	CSF3R	GFAP	HLA-B	IGF1	IGFBP5	ITGAM	ITGB5	LAG3	LY86	SERPINA3	SLC14A1	SPI1	STAT3	TBXAS1	TF	TLR7	Ap1	CEBPB	EGFR	IL6	LEP	NFkB (complex)	PRKCD	STAT3	TP53	beta-estradiol
TGFB1		growth factor		1.819	bias	8.03e-10	B2M	C1QA	C1QB	C1QC	CCL3L1/CCL3L3	CD68	CHI3L1	CSF1R	CTSD	CTSS	FCER1G	GFAP	GUSB	HEXA	HEXB	IGF1	IGFBP5	INPP5D	ITGAM	ITGAX	ITGB2	ITGB5	MSN	RASGRP3	RUNX1	S1PR3	SERPINA3	SPI1	STAT3	CEBPA	CEBPB	CSF3	EGFR	NFkB (complex)	PRKCD	STAT3	TGFB1
tretinoin		chemical - endogenous mammalian	Activated	3.677	bias	1.91e-09	APBB1IP	BCL2A1	C1QA	C3AR1	CD53	CD68	CLDN11	CSF1R	CSF3R	CTSD	FCER1G	GFAP	HLA-B	IGF1	IGFBP5	ITGAM	ITGAX	ITGB2	LYN	MAFB	PIK3CG	PLEK	SPI1	STAT3	TF	TYROBP	CEBPA	CEBPB	CEBPD	CSF3	Creb	EGF	JUN	NFkB (complex)	STAT3	TP53	tretinoin
CSF2		cytokine	Activated	2.931	bias	4.13e-09	BCL2A1	CCL3L1/CCL3L3	CD180	CLEC7A	CSF1R	FCGR2B	IGF1	INPP5D	ITGAM	ITGAX	ITGB5	LCP1	OSMR	PIK3CG	SPI1	Ap1	CSF2	SP1	TNFRSF1A
17-alpha-ethinylestradiol		chemical drug	Activated	2.333	bias	4.16e-09	C1QB	C1QC	CCL3L1/CCL3L3	CD53	CD68	CSF1R	CTSS	IGF1	LY86	SLC11A1
CEBPD		transcription regulator		1.072	bias	8.89e-09	BCL2A1	CCL3L1/CCL3L3	CSF1R	CSF3R	GFAP	IGFBP5	ITGAM	ITGAX	AR	CEBPB	CEBPD	IL6	STAT3
CSF3		cytokine	Activated	2.408	bias	9.49e-09	C3AR1	CCL3L1/CCL3L3	CSF3R	CTSD	GFAP	IGF1	ITGAM	ITGB2	SPI1	STAT3	AR	Ap1	CEBPA	CEBPB	CEBPD	CSF3	IL6	JUN	NFkB (complex)	SP1	STAT3	TNFRSF1A	TP53
CSF1		cytokine		1.606	bias	1.15e-08	CD68	CSF1R	FCER1G	FCGR2A	IGF1	ITGAM	ITGB5	MAFB	RUNX1	SPI1	Ap1	CEBPA	CSF1	Il3	JUN	PTPN11	SP1	SPI1	TNFRSF1A
dexamethasone		chemical drug		0.242		2.24e-08	B2M	BCL2A1	C1QB	C3AR1	CCL3L1/CCL3L3	CHI3L1	CLEC7A	CMKLR1	CSF1R	CTSD	FCGR2B	GRN	HPGDS	IGF1	IGFBP5	ITGAM	ITGB5	LAPTM5	LYN	PLEK	SAMSN1	SERPINA3	SLC14A1	SLCO2B1	TBXAS1	TF	Ap1	CEBPA	CEBPB	JUN	TNFSF11	dexamethasone
hydroxypropyl-beta-cyclodextrin		chemical drug	Inhibited	-2.2	bias	2.9e-08	CCL3L1/CCL3L3	CD68	CTSD	GUSB	ITGAX
CpG oligonucleotide		chemical drug	Activated	2.797	bias	6.88e-08	BCL2A1	CCL3L1/CCL3L3	FCGR2B	GPR84	INPP5D	ITGAX	LYN	SAMSN1
IRF8	2.254	transcription regulator		1.257	bias	8.74e-08	B2M	CSF1R	CSF3R	CTSS	IRF8	ITGAM	MAFB	TYROBP
EGFR		kinase		0.771	bias	9.16e-08	CHI3L1	GFAP	GRN	IGF1	IGFBP5	ITGB5	OSMR	RUNX1	SERPINA3	STAT3	TBXAS1	AR	CEBPB	CEBPD	Creb	EGF	EGFR	IL6	NFkB (complex)	STAT3	TP53
NPC1		transporter				1.01e-07	CCL3L1/CCL3L3	CD68	CTSD	GUSB	ITGAX	STAT3
IL3		cytokine		1.557	bias	1.43e-07	C1QA	CD53	CSF1R	FCGR2A	FCGR2B	Gp49a/Lilrb4	HLA-B	ITGAM	ITGAX	LYN	MAN2B1	SPI1
TPH2		enzyme				1.7e-07	GFAP	IGF1	ITGAM
daidzein		chemical drug		1.134	bias	2.01e-07	FCGR2B	GFAP	HLA-B	ITGB2	LAPTM5	LCP2	LY86
CEBPA		transcription regulator		1.493	bias	2.4e-07	BCL2A1	C3AR1	CHI3L1	CSF1R	CSF3R	HLA-B	IGF1	ITGAM	ITGAX	ITGB5	SPI1	TBXAS1	Ap1	CEBPA	JUN	LEP	NFkB (complex)	PTPN11	RELA	SPI1	STAT3
PSEN2		peptidase	Inhibited	-2.6		2.63e-07	C1QA	C1QB	C3AR1	CD9	CTSS	CTSZ	GFAP
CEBPB		transcription regulator	Activated	2.754	bias	3.44e-07	BCL2A1	CCL3L1/CCL3L3	CSF1R	CSF3R	GFAP	HLA-B	IGF1	LCP2	LYN	STAT3	TF	TMEM176A	AR	CEBPA	CEBPB	CEBPD	IL6	JUN	STAT3	TP53
STAT1		transcription regulator		1.596	bias	3.91e-07	B2M	CCL3L1/CCL3L3	CSF3R	FCER1G	IGF1	IRF8	ITGAX	RUNX1	SERPINA3	Wfdc17
staurosporine		chemical - kinase inhibitor	Inhibited	-2		9.49e-07	CD53	CSF3R	FCGR2A	Gp49a/Lilrb4	IGF1	IGFBP5	ITGB2
IGF1R		transmembrane receptor		-0.965	bias	1.08e-06	Cd33	CD37	CD53	CD68	CD84	IGF1	IGFBP5	ITGAM	STAT3
JAK2		kinase		1.931	bias	1.09e-06	CST7	FCGR2B	GFAP	LYN	OSMR	SLC11A1	STAT3
BID		other	Activated	2	bias	1.59e-06	C3AR1	CTSD	CTSS	ITGAX
FES		kinase				1.68e-06	CSF3R	ITGAM	ITGAX
IL4		cytokine		1.518	bias	1.85e-06	CCL3L1/CCL3L3	CLEC7A	CSF3R	CST7	FCER1G	FCGR2A	FCGR2B	Gp49a/Lilrb4	IGF1	IRF8	ITGAX	ITGB2	SAMSN1	SELPLG	TREM2	IL4	STAT1	STAT6
NOS2		enzyme	Activated	2.412		1.96e-06	BCL2A1	CCL3L1/CCL3L3	CD53	CHI3L1	CSF3R	Gp49a/Lilrb4	SERPINA3	TYROBP
PSEN1		peptidase	Inhibited	-2.947		3.48e-06	C1QA	C1QB	C1QC	C3AR1	CCL3L1/CCL3L3	CD9	CTSS	CTSZ	GFAP	IGF1	SELPLG
phorbol myristate acetate		chemical drug	Activated	3.228	bias	4.21e-06	BCL2A1	CCL3L1/CCL3L3	CD68	CSF1R	CTSD	FCER1G	IGF1	IGFBP5	ITGAM	ITGAX	ITGB2	RUNX1	SELPLG	SERPINA3	STAT3	TBXAS1	TLR7	CEBPA	CEBPD	Creb	EGF	NFkB (complex)	P38 MAPK	STAT3	TGFB1	TP53	calcitriol	phorbol myristate acetate
STAT3	1.621	transcription regulator	Activated	3.108	bias	5.24e-06	CCL3L1/CCL3L3	CD9	CHI3L1	FCER1G	GFAP	HLA-B	IGFBP5	ITGAM	ITGB2	SERPINA3	STAT3	AR	CEBPB	CEBPD	Creb	EP300	IL6	NFkB (complex)	RELA	STAT3	TNF
LIF		cytokine		1.702		5.44e-06	CCL3L1/CCL3L3	CD9	CSF1R	GFAP	IGF1	SERPINA3	STAT3	TMEM176A	CEBPA	CEBPB	LIF	NFkB (complex)	STAT3	TP53
STAT6		transcription regulator		0.319	bias	9.67e-06	CCL3L1/CCL3L3	CST7	CTSS	FCER1G	FCGR2A	Gp49a/Lilrb4	IGF1	SAMSN1	Ap1	IL13	IL4	STAT1	STAT6
TLR4		transmembrane receptor	Activated	2.586	bias	1.01e-05	CCL3L1/CCL3L3	FCGR2B	GFAP	Gp49a/Lilrb4	IRF8	ITGAM	PLEK	TREM2	Wfdc17	CEBPA	CEBPB	CEBPD	NFkB (complex)	STAT3	TLR4	lipopolysaccharide
CSF1R	2.04	kinase				1.06e-05	CCL3L1/CCL3L3	CSF1R	SPI1	STAT3
CDH11		other	Activated	2	bias	1.06e-05	CD9	IGF1	ITGB2	S1PR3
IL13		cytokine		1.246	bias	1.09e-05	BCL2A1	C3AR1	CCL3L1/CCL3L3	CD37	CHI3L1	CLEC7A	CTSS	GPNMB	IGF1	SAMSN1	Ap1	IL13	NFkB (complex)	STAT6
TNFRSF1A		transmembrane receptor		0.896	bias	1.12e-05	CCL3L1/CCL3L3	CD68	GFAP	IGF1	ITGAM	ITGB5	AR	Ap1	CEBPB	CEBPD	IL6	NFkB (complex)	PRKCD	SP1	STAT3	TGFB1	TNFRSF1A
HRG		other	Activated	2	bias	1.25e-05	C1QA	C1QB	C1QC	ITGAX
IgG		complex		-0.436	bias	1.29e-05	B2M	CD9	FCGR2A	FCGR2B	GFAP	KLK6	TLR7
PD98059		chemical - kinase inhibitor	Inhibited	-2.184	bias	1.29e-05	CCL3L1/CCL3L3	CD37	GRN	IGF1	ITGAM	ITGAX	ITGB2	ITGB5	OSMR	RUNX1	STAT3	TF	Ap1	CEBPD	EGFR	NFkB (complex)	P38 MAPK	PD98059	SP1	STAT3	TNFRSF1A	TP53
C5		cytokine		1.637	bias	1.35e-05	CCL3L1/CCL3L3	FCGR2A	FCGR2B	ITGAM	ITGB2	STAT3	C5	CEBPA	CEBPB	CEBPD	CSF3	NFkB (complex)	P38 MAPK	STAT3	TP53
CD3		complex		-1.066	bias	1.47e-05	BCL2A1	CCL3L1/CCL3L3	CD53	FCER1G	IGF1	IGFBP5	IRF8	ITGB5	LCP1	LYN	NAIP	PLEK	SELPLG	CD3	STAT5a/b
mir-21		microRNA		-0.82	bias	1.48e-05	CCL3L1/CCL3L3	CD180	CLEC5A	CSF3R	FCGR2A	STAT3	TREM2
PLA2G2D		enzyme				1.98e-05	CD68	ITGAM	ITGAX
rosiglitazone		chemical drug		1	bias	2.15e-05	C1QA	C1QB	C1QC	CCL3L1/CCL3L3	CD68	CLEC7A	HPGDS	IGF1	IGFBP5	ITGAM	AR	Ap1	CEBPD	IGF1	LEP	NFkB (complex)	STAT3	TP53	prostaglandin E2	rosiglitazone
HRAS		enzyme		1.706	bias	2.47e-05	B2M	C1QC	CTSS	CTSZ	GRN	GUSB	HLA-B	IGFBP5	ITGAM	ITGB5	SELPLG	STAT3
KITLG		growth factor				2.58e-05	B2M	CCL3L1/CCL3L3	CD68	CSF3R	GFAP	LAPTM5	SAMSN1	STAT3	AR	CEBPB	CEBPD	IL6	KITLG	STAT3
Il3		cytokine				2.68e-05	CD68	CSF1R	CSF3R	IGF1	ITGAM	CEBPA	Il3	JUN	PTPN11	SPI1
ciprofloxacin		chemical drug		1.671		2.7e-05	CD68	CTSD	GRN	GUSB	HLA-B	TLR7
AR		ligand-dependent nuclear receptor		1.27	bias	2.87e-05	CCL3L1/CCL3L3	CLDN11	GFAP	GUSB	IGF1	IGFBP5	S1PR3	TBXAS1	TF	AR	Ap1	NFkB (complex)
GPR34		other				3.1e-05	ITGAM	ITGB2
HTR3A		ion channel				3.1e-05	GFAP	ITGAM
N-formyl-Met-Leu-Phe		chemical reagent				3.75e-05	ITGAM	ITGB2	MSN	SELPLG
TNFSF11		cytokine		0.051	bias	4.45e-05	BCL2A1	C3AR1	CCL3L1/CCL3L3	CSF1R	IGF1	IRF8	ITGAM	MAFB	Ap1	CEBPA	CEBPB	CEBPD	IL13	JUN	NFkB (complex)	P38 MAPK	RELA	SPI1	STAT3	STAT6	TNFSF11	TP53
Fcgr3		group				4.66e-05	ITGAM	ITGAX	ITGB2
Hbb-b2		other				4.72e-05	C1QA	CLEC7A	LY86	TF
Pam3-Cys-Ser-Lys4		chemical reagent	Activated	2.219	bias	4.8e-05	BCL2A1	CCL3L1/CCL3L3	FCGR2A	FCGR2B	Wfdc17	EP300	IFNG	NFkB (complex)	Pam3-Cys-Ser-Lys4	STAT3
ITK		kinase	Activated	2.236	bias	5.14e-05	FCER1G	HLA-B	LYN	MYO1F	TF
paclitaxel		chemical drug		0.762	bias	5.84e-05	CD53	GFAP	Gp49a/Lilrb4	ITGB5	LCP1	LCP2	OSMR	STAT3	EGFR	STAT3	paclitaxel
PURA		transcription regulator				5.9e-05	GFAP	ITGAM	ITGAX
cuprizone		chemical toxicant				7.35e-05	CCL3L1/CCL3L3	GFAP	IGF1
Interferon alpha		group	Activated	2.265	bias	7.35e-05	B2M	BCL2A1	C3AR1	HLA-B	IRF8	ITGAM	STAT3	TLR7	CEBPB	EP300	IFNG	Interferon alpha	REL
Ifnar		group	Activated	2.2	bias	7.55e-05	B2M	FCER1G	HLA-B	IRF8	UNC93B1	Ifnar	STAT1
TGM2		enzyme	Activated	2.611	bias	8.9e-05	BCL2A1	FCER1G	HLA-B	ITGAM	ITGAX	MAFB	TYROBP
PRL		cytokine	Activated	2.583	bias	9.5e-05	B2M	CTSD	CTSS	GPNMB	IGFBP5	MSN	SERPINA3
Tgf beta		group		0.97	bias	0.000101	CCL3L1/CCL3L3	CSF1R	GUSB	IGF1	IGFBP5	INPP5D	RUNX1	CEBPD	NFkB (complex)	P38 MAPK	STAT3	TGFB1	TP53	Tgf beta
Bay 11-7082		chemical - kinase inhibitor		-1.982	bias	0.000105	BCL2A1	CCL3L1/CCL3L3	CHI3L1	SAMSN1
HBB		transporter				0.000105	C1QA	CLEC7A	LY86	TF
IGF1	1.669	growth factor	Activated	2.362	bias	0.000106	C1QA	CCL3L1/CCL3L3	CTSD	GFAP	IGF1	IGFBP5	ITGB5	OSMR	TF	AR	Ap1	CEBPA	CEBPB	CEBPD	EGFR	IGF1	IL6	NFkB (complex)	STAT3	TP53
poly rI:rC-RNA		chemical reagent	Activated	2.116	bias	0.000108	B2M	CCL3L1/CCL3L3	CLEC7A	FCGR2B	HLA-B	IGF1	ITGAM	ITGAX	LYN	EP300	KAT2B	REL	RELA	STAT1	poly rI:rC-RNA
NFIX		transcription regulator				0.000109	CHI3L1	GFAP	SERPINA3
IL2		cytokine		1.203	bias	0.000125	CCL3L1/CCL3L3	CMKLR1	CSF1R	CYTH4	FCER1G	GFAP	LAPTM5	LCP2	SELPLG	STAT3
RUNX1	1.702	transcription regulator		1.969	bias	0.000127	CD53	CHI3L1	CSF1R	SPI1	STAT3
BIRC5		other				0.000148	C1QC	Cd52	CD53	FCGR2B
androgen		chemical - other				0.000151	CTSZ	IGF1	IGFBP5	ITGAM	RUNX1	STAT3
SATB1		transcription regulator		1.377		0.000157	CTSD	HVCN1	IRF8	LAG3	SPI1
LEPR		transmembrane receptor				0.000157	CCL3L1/CCL3L3	CD68	GFAP	IGF1	ITGAM	STAT3	Ap1	LEP	LEPR	NFkB (complex)	STAT3
IL17A		cytokine		1	bias	0.000163	BCL2A1	CD68	GUSB	HEXB	OSMR	STAT3
Ifn		group		1.067	bias	0.000174	B2M	BCL2A1	IGF1	IRF8	TLR7	Ifn	STAT1
APOE		transporter	Inhibited	-2.438	bias	0.000177	CCL3L1/CCL3L3	CD68	CTSD	CTSS	FCGR2B	ITGAM	SERPINA3	APOE	Ap1	SP1	TNFRSF1A
TYROBP	4.491	transmembrane receptor				0.00021	FCGR2B	ITGAX	TYROBP
IL8		cytokine		1.23	bias	0.000235	ITGAM	ITGAX	ITGB2	MYO1E
chrysotile asbestos		chemical toxicant				0.000242	CTSS	CTSZ	ITGAX
CAMP		other	Activated	2	bias	0.00027	CSF3R	ITGAM	ITGAX	ITGB2
C5AR1		G-protein coupled receptor				0.000277	FCER1G	FCGR2A	FCGR2B	C5AR1	IL4	STAT1	STAT6
cholesterol		chemical - endogenous mammalian		1.982		0.000287	C1QC	CD68	FCGR2B	ITGAM	ITGAX	LAPTM5
PTPN11		phosphatase				0.000289	CD68	CSF1R	CSF3R	IGF1	JUN	PTPN11	SPI1
RHO		G-protein coupled receptor	Inhibited	-2		0.000289	B2M	C1QA	CSF1R	CTSS
IntegrinŒ±		group				0.000306	ITGAM	ITGB2
RFXAP		transcription regulator				0.000306	B2M	HLA-B	CIITA	KAT2B	RFXAP
CCR1		G-protein coupled receptor				0.000315	CCL3L1/CCL3L3	CTSS	ITGAM
PAK1		kinase				0.000315	CTSD	ITGAM	ITGB2
PPP3CA		phosphatase				0.000331	CD9	GFAP	GRN	TF
NFkB (complex)		complex	Activated	2.174	bias	0.000335	BCL2A1	CCL3L1/CCL3L3	CST7	GFAP	HLA-B	ITGAM	RUNX1	SELPLG	SERPINA3	Wfdc17	NFkB (complex)	STAT3
genistein		chemical drug		1.885		0.000379	FCGR2B	HLA-B	IGF1	ITGB2	LAPTM5	LCP2	LY86
mir-223		microRNA	Activated	2.236	bias	0.000396	CD180	Cd33	HPGDS	IGF1	TLR7
Nuclear factor 1		group				0.000402	CHI3L1	GFAP	SERPINA3
U0126		chemical - kinase inhibitor	Inhibited	-2.621	bias	0.000412	CCL3L1/CCL3L3	CSF1R	GFAP	GRN	ITGB5	OSMR	RUNX1	STAT3	TF	AR	Ap1	CEBPA	CEBPB	EGFR	IGF1	STAT3	TP53	U0126
cycloheximide		chemical reagent		0.461		0.000412	APBB1IP	B2M	CCL3L1/CCL3L3	HEXA	IGF1	IGFBP5	ITGAM	ITGB5	AR	Ap1	CEBPB	CEBPD	IL6	NFkB (complex)	P38 MAPK	STAT3	TP53	cycloheximide	prostaglandin E2
EPO		cytokine				0.000418	B2M	CTSZ	LAPTM5	LCP1	SAMSN1	STAT3	TF
EGF		growth factor		1.8	bias	0.000419	CSF1R	CTSD	GFAP	IGF1	IGFBP5	ITGAM	RUNX1	SERPINA3	SPI1	AR	Ap1	CEBPB	CEBPD	EGF	EGFR	IL6	NFkB (complex)	STAT3	TGFB1	TP53	beta-estradiol	prostaglandin E2
IL1		group	Activated	2.479	bias	0.000429	CLEC7A	CSF1R	GFAP	IGF1	ITGAM	ITGB2	TLR7	Ap1	CEBPA	CEBPB	CEBPD	CSF3	IL1	NFkB (complex)	STAT3	prostaglandin E2
methylprednisolone		chemical drug		1.126		0.000435	B2M	C1QB	CD9	CTSS	FCGR2A	IGF1	ITGB5	MAFB	SERPINA3	STAT3
SELPLG	1.634	other				0.00045	BCL2A1	IGF1	ITGAM
lysophosphatidic acid		chemical - other		1.992	bias	0.000452	GRN	ITGAM	S1PR3	TF
G protein alphai		group				0.000458	FCGR2A	FCGR2B
SCGB3A2		other				0.000458	CTSD	CTSS
TNFRSF10A		transmembrane receptor				0.000458	ITGAM	STAT3
APCS		other				0.000458	FCGR2A	FCGR2B
prostaglandin E2		chemical - endogenous mammalian		0.861	bias	0.000462	CCL3L1/CCL3L3	CST7	GFAP	IGF1	IGFBP5	ITGAM	MAFB	AR	Ap1	CEBPD	IGF1	NFkB (complex)	STAT3	TP53	prostaglandin E2
PTGS2		enzyme		0.391	bias	0.000466	CCL3L1/CCL3L3	CD68	CTSD	IGF1	PIK3CG	PTGS2	SP1	indomethacin
Ap1		complex				0.000545	BCL2A1	C3AR1	CCL3L1/CCL3L3	GFAP	IGF1	Ap1	NFkB (complex)	STAT3
CD40LG		cytokine		1.477	bias	0.000547	B2M	BCL2A1	FCGR2B	ITGAM	PLEK	SAMSN1	SELPLG	TREM2
ETS1		transcription regulator		1	bias	0.000552	CSF1R	FCGR2A	ITGB2	RUNX1	SPI1	TBXAS1
imatinib		chemical drug		1.154	bias	0.000569	ITGAM	ITGAX	LYN	STAT3
STAT5a/b		group				0.000569	BCL2A1	FCER1G	IGF1	LCP2
SELP		transmembrane receptor				0.000617	BCL2A1	CCL3L1/CCL3L3	IGF1
amiodarone		chemical drug				0.000617	GRN	SLCO2B1	TF
CACNA1A		ion channel				0.000638	CD68	ITGAM
PRKCD		kinase				0.000671	CD68	GFAP	ITGAM	STAT3	AR	CEBPB	CEBPD	IL6	NFkB (complex)	PRKCD	STAT3
SMARCA4		transcription regulator	Activated	2	bias	0.000671	BCL2A1	CTSS	HEXB	IGF1	IGFBP5	SLC11A1	TREM2
TLR9		transmembrane receptor	Activated	2.219	bias	0.000682	CCL3L1/CCL3L3	Gp49a/Lilrb4	Oasl2	TLR7	Wfdc17
LEP		growth factor		1.111	bias	0.000704	BCL2A1	CCL3L1/CCL3L3	CD68	GFAP	IGF1	ITGAM	SPI1	STAT3	AR	Ap1	CEBPB	CEBPD	IL6	LEP	LEPR	NFkB (complex)	STAT3	TGFB1	prostaglandin E2
ibuprofen		chemical drug				0.000748	GFAP	ITGAM	SERPINA3	NFkB (complex)	STAT3	ibuprofen
bucladesine		chemical toxicant		1.969	bias	0.000766	C3AR1	FCGR2A	GFAP	IGF1	IGFBP5	ITGB2	TF	Ap1	NFkB (complex)	bucladesine
ARNT2		transcription regulator	Activated	2.449	bias	0.000814	Cd52	CMKLR1	FCGR2A	HLA-B	LCP1	TYROBP
VEGFA		growth factor	Activated	2.423	bias	0.000814	BCL2A1	CTSS	IGFBP5	INPP5D	RASGRP3	RUNX1	CEBPD	NFkB (complex)	P38 MAPK	STAT3	TP53	VEGFA
RUNX1T1		transcription regulator				0.000848	CSF1R	SPI1
TLR2/3/4/9		group				0.000848	FCGR2B	TREM2
beta-estradiol		chemical - endogenous mammalian		0.251	bias	0.00088	BCL2A1	CHI3L1	CSF3R	CTSD	FCGR2A	FCGR2B	GFAP	HLA-B	IGF1	IGFBP5	ITGB2	KLK6	RUNX1	SERPINA3	SLC14A1	SLCO2B1	STAT3	TF	AR	CEBPA	CEBPB	CEBPD	EGFR	IL6	NFkB (complex)	STAT3	TP53	beta-estradiol
peptidoglycan		chemical - endogenous non-mammalian				0.000911	BCL2A1	CCL3L1/CCL3L3	ITGB2	TLR7	CEBPD	NFkB (complex)	P38 MAPK	STAT3	TP53	peptidoglycan
indomethacin		chemical drug		0.64	bias	0.000928	CCL3L1/CCL3L3	CTSD	FCGR2A	GPNMB	IGF1	ITGAM	Ap1	CEBPA	CEBPB	CEBPD	CSF3	NFkB (complex)	SP1	STAT3	indomethacin	prostaglandin E2
SIM1		transcription regulator	Activated	2.449	bias	0.000928	Cd52	CMKLR1	FCGR2A	HLA-B	LCP1	TYROBP
hemin		chemical - endogenous mammalian				0.00106	CCL3L1/CCL3L3	GFAP	IGF1	AR	CEBPB	CEBPD	IL6	STAT3	hemin
ethanol		chemical - endogenous mammalian		1.912	bias	0.00107	C3AR1	GFAP	HLA-B	ITGAM	ITGAX	STAT3	TLR7	AR	CEBPA	CEBPB	CEBPD	IL6	JUN	NFkB (complex)	PRKCD	RELA	SPI1	STAT3	ethanol
Il8r		group				0.00109	ITGAM	ITGAX
astragalin		chemical - endogenous non-mammalian				0.00109	GFAP	STAT3
Ccl6		cytokine				0.00109	CCL3L1/CCL3L3	CTSS
L-N6-(1-iminoethyl)-lysine		chemical reagent				0.00109	ITGAM	STAT3
5-O-mycolyl-beta-araf-(1->2)-5-O-mycolyl-alpha-araf-(1->1')-glycerol		chemical - endogenous non-mammalian		1	bias	0.0011	BCL2A1	CCL3L1/CCL3L3	CMKLR1	NAIP
bleomycin		chemical drug				0.00113	CCL3L1/CCL3L3	CTSD	CTSS	IGF1	MSN	STAT3	TGFB1	bleomycin
RUNX3		transcription regulator				0.00115	ITGAM	ITGAX	RUNX1
CALCA		other		1.951	bias	0.00115	GFAP	IGF1	PLXDC2	SPI1
RELA		transcription regulator	Activated	2.401	bias	0.00117	B2M	BCL2A1	CHI3L1	HLA-B	IGF1	INPP5D	LYN	CEBPB	Creb	EP300	KAT2B	REL	RELA	STAT3	TNF
APP		other		1.199	bias	0.0012	CCL3L1/CCL3L3	CD68	CSF1R	CTSD	FCGR2A	FCGR2B	GFAP	IGF1	IGFBP5	ITGAM	TLR7	APP	AR	CEBPB	CEBPD	IL6	STAT3
MKL2		transcription regulator				0.00121	Gp49a/Lilrb4	HLA-B	RUNX1	TBXAS1
Collagen(s)		complex				0.00124	C3AR1	CD68	ITGAM
KIT		transmembrane receptor				0.00126	C3AR1	CD53	Gp49a/Lilrb4	STAT3
dihydrotestosterone		chemical - endogenous mammalian		1.775	bias	0.00129	B2M	CHI3L1	CMKLR1	GFAP	GRN	HPGDS	IGF1	IGFBP5	TF	AR	Ap1	EGFR	STAT3	dihydrotestosterone
lipid A		chemical toxicant				0.00134	CCL3L1/CCL3L3	FCGR2B	LYN
S-nitrosoglutathione		chemical toxicant				0.00134	GFAP	IGF1	ITGAM	Ap1	NFkB (complex)	S-nitrosoglutathione
mir-130		microRNA				0.00135	IRF8	MAFB
miR-155-5p (miRNAs w/seed UAAUGCU)		mature microRNA	Inhibited	-2.163	bias	0.00137	CSF1R	INPP5D	MAFB	MYO1E	SPI1
IL15		cytokine				0.00142	CD53	CMKLR1	ITGB5	LYN	PLEK	SELPLG	TYROBP
platelet activating factor		chemical - endogenous mammalian				0.00144	ITGAM	ITGB2	SELPLG
CDC42		enzyme				0.00144	GFAP	SPI1	STAT3
TET2		other				0.00144	Gp49a/Lilrb4	ITGAX	ITGB2
WNT5A		cytokine				0.0015	CCL3L1/CCL3L3	IRF8	LCP1	STAT3
IKBKB		kinase	Activated	2.401	bias	0.00154	CCL3L1/CCL3L3	CTSZ	GRN	HLA-B	ITGB5	STAT3
IL11		cytokine				0.00155	BCL2A1	IGF1	SERPINA3
IL6ST		transmembrane receptor				0.00155	CSF1R	GFAP	STAT3	CEBPB	CNTF	IL6ST	LIF	STAT3
SLC4A1		transporter				0.00165	FCER1G	FCGR2A
RFX5		transcription regulator				0.00165	B2M	HLA-B
CFB		peptidase				0.00165	C3AR1	ITGAM
ethylenediaminetetraacetic acid		chemical drug				0.00165	BCL2A1	SELPLG
trientine		chemical drug				0.00165	IGF1	IGFBP5
Ige		complex				0.00166	CCL3L1/CCL3L3	FCER1G	TLR7
PPARD		ligand-dependent nuclear receptor		0.398	bias	0.00173	C1QA	C1QB	C1QC	CD68	CLEC7A
IRF4		transcription regulator				0.00176	B2M	CD68	CTSS	INPP5D
IL12B		cytokine				0.0019	INPP5D	SELPLG	STAT3
IFNAR1		transmembrane receptor				0.00191	B2M	CCL3L1/CCL3L3	HLA-B	Oasl2
alpha-amanitin		chemical toxicant				0.00197	CTSD	GFAP
Cebpd		other				0.00197	IGF1	IGFBP5
Fe2+		chemical - endogenous mammalian				0.00197	CCL3L1/CCL3L3	TF	AR	Ap1	Fe2+	IGF1	TP53
CD40		transmembrane receptor		0.78	bias	0.0021	BCL2A1	FCGR2B	ITGAM	ITGB2	SAMSN1	CD40	CEBPD	NFkB (complex)	P38 MAPK	STAT3	TP53
Cg		complex	Activated	2.195	bias	0.00212	B2M	CLDN11	HLA-B	IGF1	ITGB5	Oasl2	RUNX1
INSIG1		other	Inhibited	-2	bias	0.00214	CD68	CLEC7A	IRF8	SELPLG
wortmannin		chemical - kinase inhibitor		-0.651	bias	0.00216	IGF1	IRF8	ITGAM	MSN	SAMSN1
CEBPE		transcription regulator				0.00216	CSF1R	CSF3R	ITGAM
IL27		cytokine		1.987	bias	0.00222	B2M	HLA-B	ITGAM	LAG3
EP300		transcription regulator		1.095	bias	0.00228	B2M	HLA-B	IGF1	ITGB2	TBXAS1	CIITA	Creb	EP300	KAT2B	REL	RELA	STAT3	TNF
PI3K (complex)		complex	Activated	2.191	bias	0.00229	CTSD	IGF1	ITGAM	ITGB2	PIK3CG	SPI1
TAF1		transcription regulator				0.00232	BCL2A1	IGF1
CSF2RA		transmembrane receptor				0.00232	ITGAM	PIK3CG
FCGR1A		transmembrane receptor				0.00232	ITGAM	ITGB2	CEBPD	FCGR1A	NFkB (complex)	P38 MAPK	STAT3	TP53
CSF3R	2.28	transmembrane receptor				0.00232	CSF3R	ITGAM
CXCL2		cytokine				0.00232	CCL3L1/CCL3L3	ITGAM
NLRC5		transcription regulator				0.00232	B2M	HLA-B
SUV39H1		enzyme				0.00232	CSF1R	CYTH4
SOCS2		other				0.00232	IGF1	STAT3
lactacystin		chemical - protease inhibitor	Inhibited	-2.164	bias	0.0024	CD9	CTSD	GFAP	HLA-B	IGFBP5	CEBPD	Creb	EGF	MYC	NFkB (complex)	SP1	TP53	lactacystin
IRF2		transcription regulator				0.00244	B2M	CTSS	IRF8	IRF1	IRF2	IRF8	Ifn	STAT1
BAX		transporter				0.00244	CTSD	CTSS	HLA-B
RGS10		other				0.00244	CCL3L1/CCL3L3	ITGAM	ITGB2
minocycline		chemical drug				0.00244	GFAP	ITGAM	ITGAX
CTNNB1		transcription regulator				0.00246	Cd52	CTSZ	FCER1G	IGFBP5	IRF8	ITGB2	MAN2B1	SERPINA3	SPI1
cigarette smoke		chemical toxicant				0.00253	CCL3L1/CCL3L3	CLEC5A	IGF1	SERPINA3	TREM2	Creb	EP300	RELA	STAT1	STAT3	TNF	cigarette smoke
MKL1		transcription regulator				0.00266	Gp49a/Lilrb4	HLA-B	RUNX1	TBXAS1
REL		transcription regulator				0.00266	B2M	BCL2A1	HLA-B	STAT3	CEBPA	CEBPB	REL	TP53
sodium selenite		chemical drug				0.0027	HPGDS	TBXAS1
HFE		transmembrane receptor				0.0027	B2M	TF
CARD11		kinase				0.0027	CCL3L1/CCL3L3	SPI1
FOXL2		transcription regulator				0.00275	BCL2A1	CCL3L1/CCL3L3	IGF1
IL6R		transmembrane receptor				0.00275	IGF1	IGFBP5	SERPINA3	AR	CEBPB	CEBPD	IL6	IL6R	STAT3
NKX3-1		transcription regulator				0.00275	CTSZ	RUNX1	STAT3
BTK		kinase				0.00275	BCL2A1	Gp49a/Lilrb4	ITGAX
MAP2K1/2		group				0.00291	CCL3L1/CCL3L3	CHI3L1	PIK3CG
Fcer1		complex				0.00291	BCL2A1	CCL3L1/CCL3L3	FCGR2B
IL18		cytokine		1.98	bias	0.00296	CCL3L1/CCL3L3	INPP5D	ITGAM	TF
carbon tetrachloride		chemical toxicant		1.378	bias	0.00302	CCL3L1/CCL3L3	IGF1	IGFBP5	S1PR3	TF	AR	CEBPB	CEBPD	Creb	EP300	IL6	RELA	STAT3	TNF	carbon tetrachloride
Igm		complex				0.00307	BCL2A1	FCGR2B	SAMSN1
JUN		transcription regulator				0.00313	BCL2A1	C3AR1	CD68	CHI3L1	CSF1R	HLA-B	ITGAM	EP300	JUN	REL	RELA	SPI1
cisplatin		chemical drug		1.134	bias	0.00317	BCL2A1	CD53	FCGR2A	Gp49a/Lilrb4	GPNMB	INPP5D	MYO1E	RUNX1	STAT3
tyrphostin AG 1478		chemical - kinase inhibitor				0.00342	ITGAM	RUNX1	S1PR3
MYD88		other		1.692	bias	0.00348	CCL3L1/CCL3L3	HLA-B	IGF1	IGFBP5	INPP5D	AR	CEBPB	CEBPD	Creb	EP300	IL6	MYD88	RELA	STAT3	TNF
SP1		transcription regulator		1.964	bias	0.00349	CHI3L1	CTSD	CYBRD1	IGF1	ITGAM	ITGAX	ITGB5	SLC11A1
interferon beta-1a		biologic drug				0.00349	CSF1R	CST7	FCER1G	TBXAS1
Smad2/3-Smad4		complex				0.00353	IGFBP5	ITGB5
infliximab		biologic drug				0.0036	FCGR2A	FCGR2B	LAG3
KDM6B		other				0.00399	CCL3L1/CCL3L3	Oasl2
FOXP1		transcription regulator				0.00399	CSF1R	ITGAM
Klra4 (includes others)		transmembrane receptor				0.00399	CCL3L1/CCL3L3	TYROBP
2-mercaptoacetate		chemical - endogenous non-mammalian				0.00399	CD68	IGF1
MIF		cytokine				0.00399	C3AR1	CCL3L1/CCL3L3	CD84	Ap1	MIF	NFkB (complex)
P38 MAPK		group				0.00401	BCL2A1	CCL3L1/CCL3L3	IGFBP5	ITGAM	ITGB2	RUNX1	Ap1	CEBPA	CEBPB	CEBPD	NFkB (complex)	P38 MAPK	STAT3	TP53	prostaglandin E2
LYN	1.93	kinase				0.00419	BCL2A1	CCL3L1/CCL3L3	FCGR2B
mibolerone		chemical drug		-1	bias	0.00421	GPNMB	HEXB	IGF1	TF
diethylstilbestrol		chemical drug				0.00438	C1QA	HLA-B	IGF1	MAFB	RUNX1
Fibrinogen		complex				0.00447	CCL3L1/CCL3L3	ITGAM
PDGF-AA		complex				0.00447	GFAP	IGF1
B2M	1.832	transmembrane receptor				0.00447	CCL3L1/CCL3L3	HLA-B
FSHB		other				0.00447	CLDN11	ITGB5
RAF1		kinase	Activated	2.219	bias	0.00447	CD37	GRN	ITGAM	ITGB5	OSMR
mir-155		microRNA				0.00461	INPP5D	SPI1	STAT3
OTX2		transcription regulator				0.00461	GPNMB	SLC14A1	TF
dehydroisoandrosterone		chemical - endogenous mammalian				0.00461	B2M	GFAP	IGF1
NR1I2		ligand-dependent nuclear receptor		-1.067		0.00488	GUSB	IGF1	STAT3	TF	FOXA2	NR1I2
ETS		group				0.00497	C3AR1	CHI3L1
GRIP1		transcription regulator				0.00497	CCL3L1/CCL3L3	IGF1
IRF1		transcription regulator				0.00503	B2M	CTSS	SPI1	STAT3
KRAS		enzyme		1.387		0.00513	B2M	GFAP	GRN	HEXA	SERPINA3	STAT3	EGFR	KRAS	STAT3
IRF7		transcription regulator	Activated	2	bias	0.00517	IRF8	ITGAM	ITGAX	Oasl2
Creb		group		1.964	bias	0.0052	CSF1R	FCER1G	IGF1	ITGAM	TF
CD28		transmembrane receptor		0	bias	0.00539	BCL2A1	FCER1G	IGFBP5	IRF8	LCP1	NAIP	CD28	CD3	STAT5a/b
ZMPSTE24		peptidase				0.00551	IGF1	IGFBP5	AR	Ap1	IGF1	TP53	ZMPSTE24
MIR124		group				0.00551	SPI1	STAT3
PIK3R6		kinase				0.00559	PIK3CG
etalocib		chemical drug				0.00559	ITGAM
SMPD3		enzyme				0.00559	IGF1
PPT1		enzyme				0.00559	GFAP
MEX3C		other				0.00559	IGF1
SLC39A14		transporter				0.00559	IGF1
SNORD21		other				0.00559	HLA-B
HDLBP		transporter				0.00559	CSF1R
TRPS1		transcription regulator				0.00559	RUNX1
ST6GALNAC2		enzyme				0.00559	SELPLG
CYTL1		cytokine				0.00559	IGF1
B4GALT6		enzyme				0.00559	GFAP
Raet1a		other				0.00559	HLA-B
AZD1981		chemical drug				0.00559	ITGAM
SEMA5A		transmembrane receptor				0.00559	GFAP
SPR		enzyme				0.00559	IGF1
ERAP1		peptidase				0.00559	HLA-B
GLO1		enzyme				0.00559	GFAP
TRD		other				0.00559	FCER1G
IGFALS		other				0.00559	IGF1
mir-434		microRNA				0.00559	STAT3
miR-659-3p (miRNAs w/seed UUGGUUC)		mature microRNA				0.00559	GRN
Raet1d/Raet1e		other				0.00559	HLA-B
KLRC2		transmembrane receptor				0.00559	TYROBP
PTS		enzyme				0.00559	IGF1
PIK3R5		kinase				0.00559	PIK3CG
CCRN4L		transcription regulator				0.00559	IGF1
SETD8		enzyme				0.00559	RUNX1
ZNF140		transcription regulator				0.00559	FCGR2B
NCR2		transmembrane receptor				0.00559	TYROBP
D-lactic acid		chemical - endogenous mammalian				0.00559	ITGAM
4-cresol		chemical toxicant				0.00559	ITGAM
cation		chemical - other				0.00559	ITGB2
D-JNK inhibitor I		chemical drug				0.00559	CSF1R
5-aminovaleric acid		chemical - endogenous non-mammalian				0.00559	GFAP
Ifn gamma		complex				0.00601	CHI3L1	IGFBP5	IRF8
CCL3		cytokine				0.00606	ITGAM	STAT3	CCL3	PRKCD	STAT3
CBFB		transcription regulator				0.00627	CSF1R	RUNX1	TLR7
methotrexate		chemical drug				0.0065	C1QB	CCL3L1/CCL3L3	CTSS	Gp49a/Lilrb4	IGFBP5
TP53		transcription regulator		0.316		0.0067	ARPC1B	BCL2A1	C1QC	CCL3L1/CCL3L3	CSF1R	CSF3R	CTSD	HLA-B	IGF1	IGFBP5	IRF8	ITGB5	RUNX1	TBXAS1	AR	CEBPA	CEBPB	CEBPD	IL6	JUN	NFkB (complex)	P38 MAPK	STAT3	TP53
calcitriol		chemical drug		0.974		0.00679	CSF1R	IGF1	IGFBP5	ITGAM	ITGAX	KLK6	TLR7	Ap1	CEBPA	CEBPD	Creb	JUN	NFkB (complex)	STAT3	calcitriol	prostaglandin E2
AG490		chemical - kinase inhibitor				0.0068	CD68	GFAP	IGF1	AG490	AR	CEBPB	CEBPD	IL6	STAT3
FGF2		growth factor		0.799	bias	0.00687	GFAP	GPNMB	IGF1	IGFBP5	RUNX1	TF	AR	Ap1	FGF2	IGF1	TP53
USF1		transcription regulator				0.00708	B2M	CHI3L1	CTSS
PTH		other		1.939	bias	0.00714	IGF1	IGFBP5	PLXDC2	RUNX1	EGFR	PTH	STAT3
CIITA		transcription regulator				0.00725	B2M	HLA-B	CIITA	EP300	KAT2B	RELA
ELF1		transcription regulator				0.00725	FCER1G	SPI1
PIK3CA		kinase				0.00725	ITGAM	PIK3CG
IGFBP3		other				0.00725	CCL3L1/CCL3L3	IGF1	AR	Ap1	IGF1	IGFBP3	TP53
CTBP1		enzyme				0.00725	CLDN11	CSF1R
PTPRC		phosphatase				0.00725	BCL2A1	CCL3L1/CCL3L3	CEBPD	NFkB (complex)	P38 MAPK	PTPRC	STAT3	TP53
TNFSF12		cytokine				0.00765	CCL3L1/CCL3L3	CD68	ITGAM	AR	CEBPB	CEBPD	IL6	STAT3	TNFSF12
Hsp27		group				0.00788	CSF1R	STAT3
PTPN6		phosphatase				0.00788	ITGB2	LYN
resiquimod		chemical drug		1.969	bias	0.0079	BCL2A1	CCL3L1/CCL3L3	GPR84	MSN
Retnlb		other				0.00795	CCL3L1/CCL3L3	IGF1	MSN
CNTF		cytokine				0.00795	GFAP	SERPINA3	STAT3	CEBPB	CNTF	LIF	NFkB (complex)	STAT3
GNAI2		enzyme				0.00854	CCL3L1/CCL3L3	STAT3
MALP-2s		chemical reagent				0.00854	BCL2A1	CCL3L1/CCL3L3	CEBPD	MALP-2s	NFkB (complex)	P38 MAPK	STAT3	TP53
ribavirin		chemical drug				0.00854	ITGAM	ITGB2	CEBPD	NFkB (complex)	P38 MAPK	STAT3	TP53	ribavirin
INSR		kinase				0.00889	BCL2A1	C1QA	GRN	IGF1	ITGB5	LCP1
KLF4		transcription regulator				0.0092	CSF1R	ITGAM	TF
eicosapentenoic acid		chemical drug				0.0092	CSF1R	IGF1	SPI1
KAT2B		transcription regulator				0.00922	B2M	HLA-B	CIITA	EP300	KAT2B	REL	RELA
4-methylnitrosoamino-1-(3-pyridinyl)-1-butanone		chemical toxicant				0.00922	LCP1	TF
FOXA2		transcription regulator				0.00934	CHI3L1	IGF1	TBXAS1	TF
MYC		transcription regulator	Inhibited	-2.345	bias	0.00941	BCL2A1	CD9	CTSD	HLA-B	ITGAM	ITGAX	KLK6	MSN	SLC11A1	TF	MYC	SP1
8-bromo-cAMP		chemical reagent		0.371	bias	0.00978	CLDN11	CTSD	GFAP	IGF1	8-bromo-cAMP	AR	Ap1	CEBPA	CEBPB	CSF3	STAT3
PAX5		transcription regulator				0.00992	CSF1R	MSN
SLC9A3		ion channel				0.00992	B2M	IRF8
CRP		other				0.00992	CCL3L1/CCL3L3	ITGAM	Ap1	CRP	LEP	LEPR	NFkB (complex)	STAT3
OLR1		transmembrane receptor				0.00992	CD68	ITGAM
oxaliplatin		chemical drug				0.00992	GFAP	STAT3
E. coli B5 lipopolysaccharide		chemical - endogenous non-mammalian	Activated	2.2	bias	0.00994	B2M	CCL3L1/CCL3L3	CSF3R	STAT3	TLR7	AR	CEBPB	CEBPD	E. coli B5 lipopolysaccharide	IL6	STAT1	STAT3
ERBB4		kinase				0.0102	IGFBP5	SERPINA3	TBXAS1
PTX3		other				0.0106	CCL3L1/CCL3L3	IGF1
ANXA1		other				0.0106	ITGAM	ITGB2
nitrofurantoin		chemical drug		1.067		0.0107	CCL3L1/CCL3L3	CTSS	GPNMB	IGF1
IGF2		growth factor				0.0107	GRN	IGF1	IGFBP5	ITGB5
COL18A1		other				0.0109	GFAP	ITGB2	STAT3
IL21		cytokine				0.0109	FCGR2B	STAT3	TYROBP
bisphenol A		chemical - endogenous non-mammalian				0.0109	IGF1	LCP2	STAT3
15-keto-13	14-dihydroprostaglandin E2		chemical - endogenous non-mammalian				0.0112	GFAP
Stat5b dimer		complex				0.0112	BCL2A1
Metalloprotease		group				0.0112	ITGAM
Esr1-Estrogen-Sp1		complex				0.0112	CTSD
NPS		other				0.0112	ITGAM
Calcb		other				0.0112	SPI1
LEPROT		other				0.0112	IGF1
RAB7B		enzyme				0.0112	CTSD
LEPROTL1		other				0.0112	IGF1
L3MBTL1		other				0.0112	RUNX1
ZDHHC2		enzyme				0.0112	CD9
ALX3		transcription regulator				0.0112	GFAP
ZDHHC7		enzyme				0.0112	TF
RBBP5		other				0.0112	CTSD
CELA1		peptidase				0.0112	HLA-B
HPX		transporter				0.0112	ITGAM
IFI30		enzyme				0.0112	CTSS
CALCB		other				0.0112	SPI1
EPHA4		kinase				0.0112	IGF1
SORT1		transporter				0.0112	GRN
ST8SIA2		enzyme				0.0112	GFAP
VPS26A		transporter				0.0112	GUSB
CDO1		enzyme				0.0112	IGF1
bisphosphonate		chemical drug				0.0112	STAT3
8-methyl-pyridoxatin		chemical reagent				0.0112	TF
bepridil		chemical drug				0.0112	GRN
paraoxon		chemical toxicant				0.0112	GFAP
all-trans-4-Oxo-retinoic acid		chemical - endogenous mammalian				0.0112	ITGAX
lanreotide		chemical drug				0.0112	IGF1
physostigmine		chemical drug				0.0112	ITGAM
protamine zinc insulin		chemical drug				0.0112	IGF1
fluorocitric acid		chemical reagent				0.0112	GFAP
trinitrobenzenesulfonic acid		chemical reagent				0.0113	CCL3L1/CCL3L3	CD68	ITGAM
JAK1		kinase				0.0114	CCL3L1/CCL3L3	OSMR
DNASE2		enzyme				0.0114	GPNMB	Oasl2
GTF2B		transcription regulator				0.0114	BCL2A1	IGF1
KRT17		other				0.0114	CCL3L1/CCL3L3	CLEC7A
bisindolylmaleimide I		chemical - kinase inhibitor				0.012	BCL2A1	IGF1	SAMSN1
IFRD1		other				0.0122	CTSZ	IGF1
AGN194204		chemical drug		1.982	bias	0.0125	BCL2A1	CCL3L1/CCL3L3	Gp49a/Lilrb4	ITGB2
TFEB		transcription regulator				0.013	CTSD	HEXA
NOD2		other				0.013	BCL2A1	ITGAM
carrageenan		chemical - endogenous non-mammalian				0.013	CCL3L1/CCL3L3	GFAP
MYOD1		transcription regulator		1.165	bias	0.013	IGF1	IGFBP5	MAFB	RUNX1
HOXA9		transcription regulator				0.013	IGF1	LY86	LYN	MAFB
TCR		complex		0.686	bias	0.0132	CCL3L1/CCL3L3	LCP2	RUNX1	STAT3	TLR7
STAT5A		transcription regulator				0.0133	BCL2A1	CCL3L1/CCL3L3	FCER1G	IGF1
TBX21		transcription regulator				0.0138	RUNX1	SELPLG
CREBBP		transcription regulator	Activated	2	bias	0.0141	B2M	HLA-B	INPP5D	SERPINA3
butyric acid		chemical - endogenous mammalian				0.0141	BCL2A1	GRN	INPP5D	ITGAM	ITGB5	STAT3
mifepristone		chemical drug		-1.342		0.0142	C1QB	CHI3L1	CTSD	FCGR2B	ITGAM
NQO1		enzyme				0.0146	CSF3R	SPI1
cyclosporin A		biologic drug		0.128	bias	0.0147	CCL3L1/CCL3L3	CD68	FCGR2A	GFAP	GPNMB	LYN
SOCS1		other				0.0149	FCER1G	Oasl2	STAT3
tanespimycin		chemical drug				0.0149	BCL2A1	LYN	STAT3
HOXA10		transcription regulator		-1	bias	0.015	CSF3R	FCER1G	IGFBP5	MSN
SOD1		enzyme				0.015	B2M	C1QA	CSF1R	GFAP
SMAD3		transcription regulator		0.781	bias	0.0153	CCL3L1/CCL3L3	INPP5D	ITGB5	TF
EDN1		cytokine				0.0153	BCL2A1	GRN	ITGAM	MSN
IL1RN		cytokine				0.0153	CTSS	IGF1	IGFBP5
hexamethylene bisacetamide		chemical reagent				0.0155	BCL2A1	SPI1
memantine		chemical drug				0.0155	GFAP	STAT3
OSM		cytokine	Activated	2.022	bias	0.0155	B2M	GPNMB	HLA-B	OSMR	RUNX1	SERPINA3	STAT3
pyrrolidine dithiocarbamate		chemical reagent				0.0158	BCL2A1	IGF1	SAMSN1
C/ebp		group				0.0163	CSF1R	IGF1
IKBKE		kinase				0.0163	CCL3L1/CCL3L3	HLA-B
LCN2		transporter				0.0163	CCL3L1/CCL3L3	MSN
GABPA		transcription regulator				0.0163	ITGB2	SPI1
Rp-8-Br-cGMPS		chemical - kinase inhibitor				0.0167	ITGAM
adalimumab		biologic drug				0.0167	FCGR2B
repertaxin		chemical drug				0.0167	ITGAM
propentofylline		chemical drug				0.0167	GFAP
dietary fat derivative		chemical drug				0.0167	ITGAM
ROBO3		transmembrane receptor				0.0167	IRF8
Eotaxin		group				0.0167	ITGAM
Raet1b		other				0.0167	HLA-B
GALNS		enzyme				0.0167	GFAP
ST8SIA4		enzyme				0.0167	GFAP
PSMC5		transcription regulator				0.0167	LYN
RIMS2		other				0.0167	IGF1
H60a		other				0.0167	HLA-B
CARD8		other				0.0167	BCL2A1
STIP1		other				0.0167	STAT3
RYBP		transcription regulator				0.0167	RUNX1
CD74		transmembrane receptor				0.0167	CD84
Mbd5		other				0.0167	IGF1
GRB10		other				0.0167	IGF1
TAPBP		transporter				0.0167	HLA-B
MATK		kinase				0.0167	LYN
LIFR		transmembrane receptor				0.0167	GFAP
[truncated: 1,279 more rows]
[truncated: 51 more columns]
