# Supplementary figures and images for: Limited Effects of aneIF2αS51AAllele on Neurological Impairments in the 5xFAD Mouse Model of Alzheimer’s Disease
Source: Hindawi journal article supplement (doi:10.1155/2015/825157), 2015-01-01

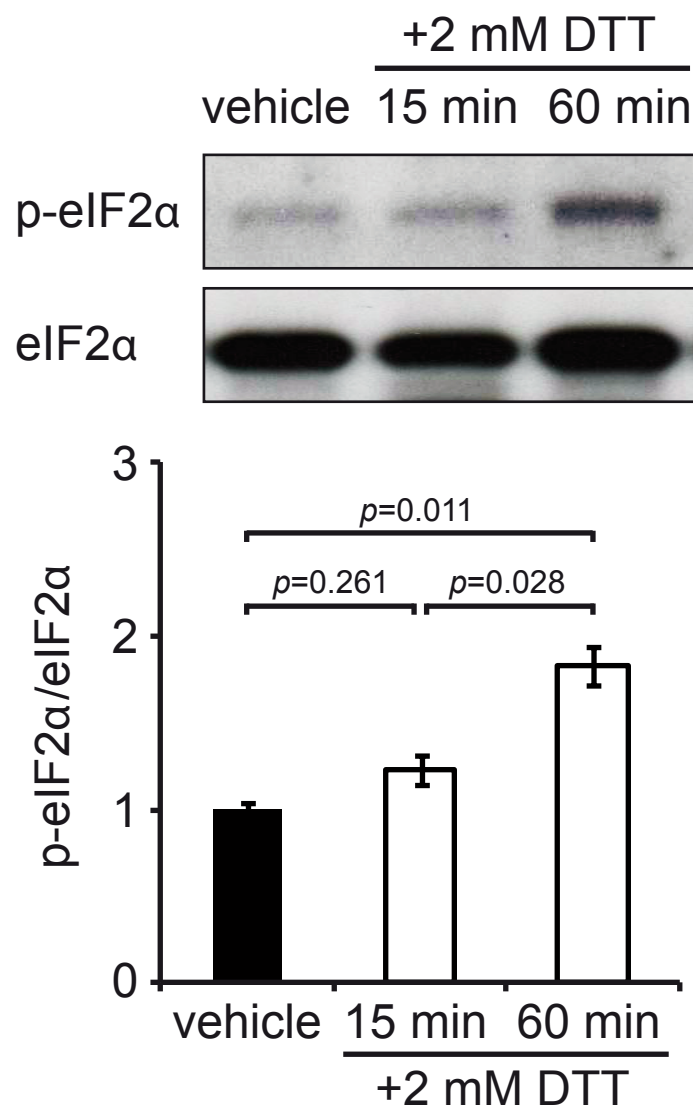

Supplement: f1 [file 825157.f1.ai]

A

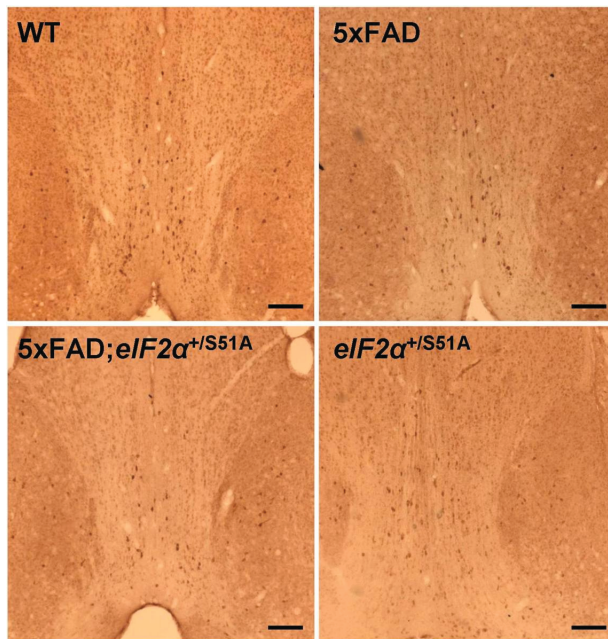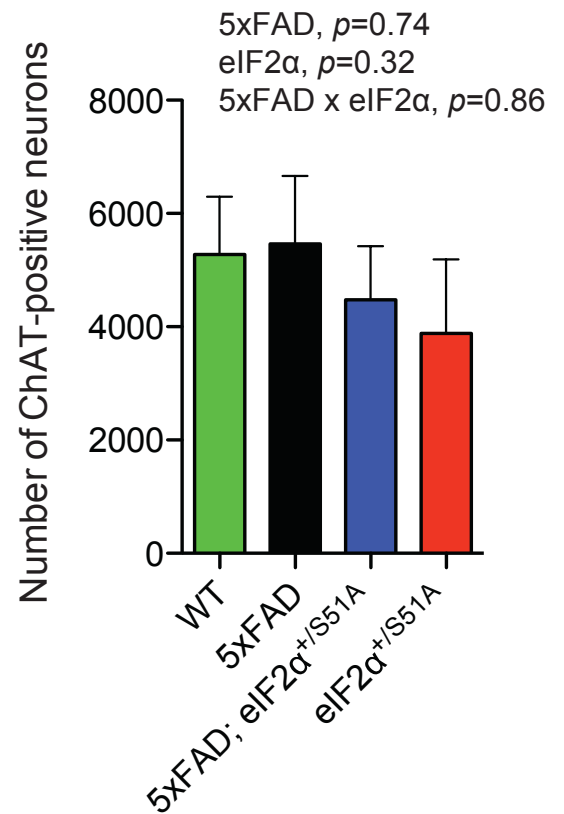

B

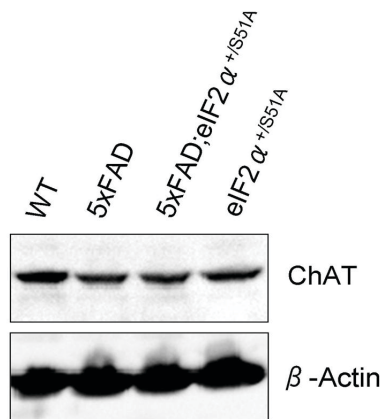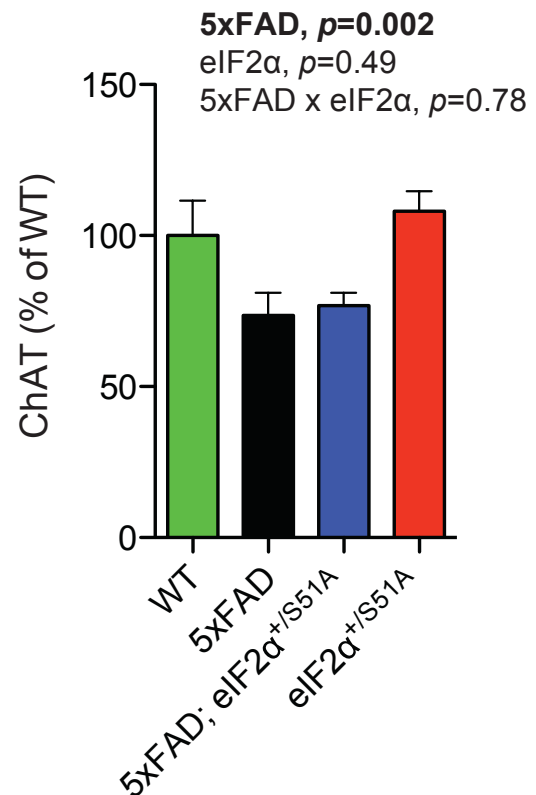

Supplementary Figure 2

Supplement: f2 [file 825157.f2.ai]
